# Supplementary material for: DNA methylation profile is a quantitative measure of biological aging in children
Source: Aging (Albany NY). 2019 Nov 22;11(22):10031–51. doi: 10.18632/aging.102399 (PMC6914436; doi:10.18632/aging.102399)
Supplement: Supplementary Table 2 [file aging-11-102399-s003..xlsx]

## Sheet: CpGs_information
No.	CpGs	Active.coefficients	GeneID	GenomeBuild	Chr	MapInfo	UGRepAcc	Symbol	UGCluster	Name	Aliases	LLRepProtAcc	Chromosome	Cytoband	GO	SPFunction	SPLocal	UniProt
0	(Intercept)	2.37685
1	cg00343092	-1.136	706	36	22	41877918	NM_000714.4	TSPO	Hs.202	translocator protein (18kDa)	||MBR||DBI||BZRP||PTBR||PBR||pk18||PKBS||BPBS||IBP||TSPO||mDRC||translocator protein (18kDa)||ISOQUINOLINE CARBOXAMIDE-BINDING PROTEIN||BENZODIAZEPINE RECEPTOR, PERIPHERAL||mitochondrial benzodiazepine receptor||TRANSLOCATOR PROTEIN, 18-KD||peripheral-type benzodiazepine receptor||benzodiazepine peripheral binding site||	NP_001243460	22	22q13.31	molecular function|benzodiazepine receptor activity|TAS|GO:0008503|GOA|1326278//molecular function|cholesterol binding|TAS|GO:0015485|GOA|16822554//biological process|anion transport|TAS|GO:0006820|GOA|16822554//biological process|apoptotic process|TAS|GO:0006915|GOA|16822554//biological process|cell proliferation|TAS|GO:0008283|GOA|16822554//biological process|heme biosynthetic process|TAS|GO:00…	can bind protoporphyrin ix and may play a role in the transport of porphyrins and heme (by similarity). promotes the transport of cholesterol across mitochondrial membranes and may play a role in lipid metabolism (pubmed:24814875), but its precise physiological role is controversial. it is apparently not required for steroid hormone biosynthesis. was initially identified as peripheral-type benzod…	mitochondrion membrane {eco:0000269|pubmed:1847678}; multi-pass membrane protein {eco:0000269|pubmed:1847678}.	O76068|P30536
2	cg00563932	-2.25497	5730	36	9	138990870	NM_000954.5	PTGDS	Hs.446429	prostaglandin D2 synthase 21kDa (brain)	||5.3.99.2||L-PGDS||LPGDS||PGDS2||cerebrin-28||PTGDS||PDS||PGD2 synthase||beta-trace protein||prostaglandin-D2 synthase||lipocalin-type prostaglandin-D synthase||glutathione-independent PGD synthase||prostaglandin-H2 D-isomerase precursor||glutathione-independent PGD synthetase||PROSTAGLANDIN D2 SYNTHASE, BRAIN||lipocalin-type prostaglandin D synthase||PROSTAGLANDIN D SYNTHASE, LIPOCALIN-TYPE||pr…	NP_000945	9	9q34.2-q34.3	molecular function|fatty acid binding|IDA|GO:0005504|GOA|20667974//molecular function|prostaglandin-D synthase activity|IDA|GO:0004667|GOA|20667974//molecular function|prostaglandin-D synthase activity|ISS|GO:0004667|GOA|na//molecular function|retinoid binding|ISS|GO:0005501|GOA|na//molecular function|transporter activity|ISS|GO:0005215|GOA|na//biological process|arachidonic acid metabolic proces…	catalyzes the conversion of pgh2 to pgd2, a prostaglandin involved in smooth muscle contraction/relaxation and a potent inhibitor of platelet aggregation. involved in a variety of cns functions, such as sedation, nrem sleep and pge2-induced allodynia, and may have an anti-apoptotic role in oligodendrocytes. binds small non-substrate lipophilic molecules, including biliverdin, bilirubin, retinal, …	rough endoplasmic reticulum {eco:0000269|pubmed:9065498}. nucleus membrane {eco:0000269|pubmed:9065498}. golgi apparatus {eco:0000269|pubmed:9065498}. cytoplasm, perinuclear region {eco:0000269|pubmed:9065498}. secreted {eco:0000269|pubmed:9065498}. note=detected on rough endoplasmic reticulum of arachnoid and menigioma cells. localized to the nuclear envelope, golgi apparatus, secretory vesicles…	P41222
3	cg00571634	1.20513	54554	36	3	123617510	NM_019069.3	WDR5B	Hs.567513	WD repeat domain 5B	||WDR5B||WD repeat-containing protein 5B||WD repeat domain 5B||	NP_061942	3	3q21.1		may function as a substrate receptor for cul4-ddb1 ubiquitin e3 ligase complex. {eco:0000250}.		Q86VZ2
4	cg00629217	-1.44311	84708	36	4	54120106	NM_032622.1	LNX1	Hs.518760	ligand of numb-protein X 1, E3 ubiquitin protein ligase	||MPDZ||PDZRN2||6.3.2.19||LNX1||numb-binding protein 1||LIGAND OF NUMB PROTEIN X1||multi-PDZ-domain-containing protein, E3 ubiquitin-protein ligase LNX||E3 ubiquitin-protein ligase LNX isoform a||PDZ domain-containing ring finger protein 2||E3 ubiquitin-protein ligase LNX isoform b precursor||ligand of numb-protein X 1, E3 ubiquitin protein ligase||	NP_116011	4	4q12	molecular function|PDZ domain binding|IEA|GO:0030165|GOA|na//molecular function|ligase activity|IEA|GO:0016874|GOA|na//molecular function|protein binding|IPI|GO:0005515|GOA|16002321//molecular function|ubiquitin-protein transferase activity|IEA|GO:0004842|GOA|na//molecular function|zinc ion binding|IEA|GO:0008270|GOA|na//biological process|protein homooligomerization|IEA|GO:0051260|GOA|na//biolog…	isoform 2 provides an endocytic scaffold for igsf5/jam4. {eco:0000250}.	cytoplasm {eco:0000250}.	Q8TBB1
5	cg01511567	0.557255	6749	36	11	56860207	NM_003146.2	SSRP1	Hs.523680	structure specific recognition protein 1	||SSRP1||T160||hSSRP1||FACTp80||FACT80||cisplatin-DNA SSRP||FACT, 80-KD SUBUNIT||high mobility group box||FACT complex subunit SSRP1||FACT 80 kDa subunit||structure-specific recognition protein 1||Structure specific recognition protein 1||CHROMATIN-SPECIFIC TRANSCRIPTION ELONGATION FACTOR, 80-KD SUBUNIT||recombination signal sequence recognition protein 1||facilitates chromatin transcription comp…	NP_003137	11	11q12	molecular function|DNA binding|IEA|GO:0003677|GOA|na//molecular function|chromatin binding|IBA|GO:0003682|GOA|na//molecular function|poly(A) RNA binding|IDA|GO:0044822|GOA|22658674//molecular function|protein binding|IPI|GO:0005515|GOA|16902406//biological process|DNA repair|IEA|GO:0006281|GOA|na//biological process|DNA replication|IEA|GO:0006260|GOA|na//biological process|chromatin remodeling|IB…	component of the fact complex, a general chromatin factor that acts to reorganize nucleosomes. the fact complex is involved in multiple processes that require dna as a template such as mrna elongation, dna replication and dna repair. during transcription elongation the fact complex acts as a histone chaperone that both destabilizes and restores nucleosomal structure. it facilitates the passage of…	nucleus. nucleus, nucleolus. chromosome. note=colocalizes with rna polymerase ii on chromatin. recruited to actively transcribed loci.	Q08945
6	cg01515426	-4.75389	51529	36	17	77443371	NM_001002249.1	ANAPC11	Hs.534456	anaphase promoting complex subunit 11	||Apc11p||ANAPC11||HSPC214||cyclosome subunit 11||Anaphase promoting complex subunit 11||hepatocellular carcinoma-associated RING finger protein||anaphase-promoting complex subunit 11 isoform 2||anaphase-promoting complex subunit 11 isoform 3||anaphase-promoting complex subunit 11 isoform 4||anaphase-promoting complex subunit 11 isoform 1||APC11 anaphase promoting complex subunit 11 homolog||anap…	NP_057560	17	17q25.3	molecular function|cullin family protein binding|IDA|GO:0097602|GOA|10230407//molecular function|ubiquitin protein ligase activity|IDA|GO:0061630|GOA|10230407//molecular function|ubiquitin-protein transferase activity|IDA|GO:0004842|GOA|11739784//molecular function|ubiquitin-ubiquitin ligase activity|IDA|GO:0034450|GOA|10230407//molecular function|zinc ion binding|IEA|GO:0008270|GOA|na//biologica…	component of the anaphase promoting complex/cyclosome (apc/c), a cell cycle-regulated e3 ubiquitin ligase that controls progression through mitosis and the g1 phase of the cell cycle. the apc/c complex acts by mediating ubiquitination and subsequent degradation of target proteins: it mainly mediates the formation of 'lys-11'-linked polyubiquitin chains and, to a lower extent, the formation of 'ly…	cytoplasm {eco:0000269|pubmed:11573242}. nucleus {eco:0000269|pubmed:11573242}.	Q9NYG5
7	cg01756060	-2.97553	1021	36	7	92463390	NM_001259.5	CDK6	Hs.119882	cyclin-dependent kinase 6	||2.7.11.22||CDK6||MCPH12||Cyclin-dependent kinase 6||serine/threonine-protein kinase PLSTIRE||PLSTIRE CDK6/MLL FUSION GENE||cell division protein kinase 6||	NP_001250	7	7q21-q22	molecular function|ATP binding|IDA|GO:0005524|GOA|9751050//molecular function|cyclin binding|IPI|GO:0030332|GOA|8114739//molecular function|cyclin-dependent protein serine/threonine kinase activity|IDA|GO:0004693|GOA|8114739//molecular function|protein binding|IPI|GO:0005515|GOA|15232106//biological process|G1/S transition of mitotic cell cycle|TAS|GO:0000082|GOA|16294322//biological process|astr…	serine/threonine-protein kinase involved in the control of the cell cycle and differentiation; promotes g1/s transition. phosphorylates prb/rb1 and npm1. interacts with d-type g1 cyclins during interphase at g1 to form a prb/rb1 kinase and controls the entrance into the cell cycle. involved in initiation and maintenance of cell cycle exit during cell differentiation; prevents cell proliferation a…	cytoplasm. nucleus. cell projection, ruffle. note=localized to the ruffling edge of spreading fibroblasts. kinase activity only in nucleus.	Q00534
8	cg01899253	-0.877084	2321	36	13	27968056	NM_002019.2	FLT1	Hs.594454	fms-related tyrosine kinase 1	||FLT1||VEGFR-1||VEGFR1||FLT-1||2.7.10.1||ONCOGENE FLT||tyrosine-protein kinase FRT||fms-like tyrosine kinase 1||tyrosine-protein kinase receptor FLT||Fms-related tyrosine kinase 1||vascular endothelial growth factor receptor 1 isoform 3 precursor||vascular endothelial growth factor receptor 1 isoform 2 precursor||vascular endothelial growth factor receptor 1 isoform 1 precursor||vascular endothe…	NP_002010	13	13q12	molecular function|ATP binding|IEA|GO:0005524|GOA|na//molecular function|VEGF-A-activated receptor activity|IDA|GO:0036326|GOA|8605350//molecular function|VEGF-B-activated receptor activity|IDA|GO:0036327|GOA|15952180//molecular function|growth factor binding|IPI|GO:0019838|GOA|10471394//molecular function|identical protein binding|IEA|GO:0042802|GOA|na//molecular function|placental growth factor…	tyrosine-protein kinase that acts as a cell-surface receptor for vegfa, vegfb and pgf, and plays an essential role in the development of embryonic vasculature, the regulation of angiogenesis, cell survival, cell migration, macrophage function, chemotaxis, and cancer cell invasion. may play an essential role as a negative regulator of embryonic angiogenesis by inhibiting excessive proliferation of…	isoform 7: cytoplasm {eco:0000305}.	L7RSL3|P17948
9	cg02385474	-1.10146	80003	36	1	231461420	NM_024938.2	null	null	null	null	null	null	null	null	null	null	null
10	cg02489552	0.534293	126402	36	19	14982531	NM_173482.1	CCDC105	Hs.375985	coiled-coil domain containing 105	||CCDC105||coiled-coil domain-containing protein 105||Coiled-coil domain containing 105||	NP_775753	19	19p13.12	cellular component|extracellular vesicular exosome|IDA|GO:0070062|GOA|19056867			Q8IYK2
11	cg02626929	0.128916	144321	36	12	2951662	NM_152436.1	GLIPR1L2	Hs.406728	GLI pathogenesis-related 1 like 2	||GLIPR1L2||GLIPR1-like protein 2 isoform 2||GLI pathogenesis-related 1 like 2||GLIPR1-like protein 2 isoform 1||	NP_689649	12	12q21.2	cellular component|integral component of membrane|IEA|GO:0016021|GOA|na		membrane {eco:0000305}; single-pass membrane protein {eco:0000305}.	Q4G1C9
12	cg02789485	0.35316	140700	36	20	74069695	NM_080621.3	SAMD10	Hs.27189	sterile alpha motif domain containing 10	||dJ591C20.7||SAMD10||C20orf136||D930033N23Rik||SAM domain-containing protein 10||Sterile alpha motif domain containing 10||sterile alpha motif domain-containing protein 10||	NP_542188	20	20q13.33	null	null	null	Q9BYL1
13	cg03224418	-0.165349	10767	36	6	62082302	NM_006620.2	HBS1L	Hs.378532	HBS1-like translational GTPase	||eRF3c||HBS1L||HSPC276||ERFS||KIAA1038||EF-1a||ERF3-similar protein||HBS1-like (S. cerevisiae)||eRF3 family member||HBS1-like translational GTPase||HBS1-like protein isoform 1||HBS1-like protein isoform 2||HBS1-like protein isoform 3||HBS1, S. CEREVISIAE, HOMOLOG OF||Hsp70 subfamily B suppressor 1-like protein||	NP_006611	6	6q23.3	molecular function|GTP binding|IEA|GO:0005525|GOA|na//molecular function|GTPase activity|IEA|GO:0003924|GOA|na//molecular function|translation elongation factor activity|IEA|GO:0003746|GOA|na//biological process|GTP catabolic process|IEA|GO:0006184|GOA|na//biological process|signal transduction|TAS|GO:0007165|GOA|9872408//biological process|translation|TAS|GO:0006412|GOA|9872408//biological proce…			Q9Y450|D9YZV0
14	cg03340261	-6.68971	4589	36	4	135417593	NM_152291.1	MUC7	Hs.631946	mucin 7, secreted	||MUC7||MUC-7||apo-MG2||salivary mucin-7||mucin-7 precursor||mucin 7, salivary||Mucin 7, secreted||MUCIN, SALIVARY, LOW MOLECULAR WEIGHT||	NP_689504	4	4q13.3	molecular function|protein binding|IPI|GO:0005515|GOA|16203048//biological process|O-glycan processing|TAS|GO:0016266|GOA|na//biological process|cellular protein metabolic process|TAS|GO:0044267|GOA|na//biological process|post-translational protein modification|TAS|GO:0043687|GOA|na//cellular component|Golgi lumen|TAS|GO:0005796|GOA|na//cellular component|extracellular vesicular exosome|IDA|GO:00…	may function in a protective capacity by promoting the clearance of bacteria in the oral cavity and aiding in mastication, speech, and swallowing. binds p.aeruginosa pili. {eco:0000269|pubmed:11378823, eco:0000269|pubmed:8104046}.	secreted {eco:0000269|pubmed:7690757}.	Q8TAX7
15	cg03970609	0.563336	26998	36	3	71372253	NM_014375.2	Fetuin B	Hs.81073	Fetuin B	||16G2||FETUB||Gugu||fetuin B||fetuin-B precursor||fetuin-like protein IRL685||	NP_055190		3q27	molecular function|cysteine-type endopeptidase inhibitor activity|IEA|GO:0004869|GOA|na//molecular function|metalloendopeptidase inhibitor activity|ISS|GO:0008191|GOA|na//molecular function|molecular_function|ND|GO:0003674|GOA|na//biological process|binding of sperm to zona pellucida|ISS|GO:0007339|GOA|na//biological process|biological_process|ND|GO:0008150|GOA|na//biological process|negative reg…	protease inhibitor required for egg fertilization. required to prevent premature zona pellucida hardening before fertilization, probably by inhibiting the protease activity of astl, a protease that mediates the cleavage of zp2 and triggers zona pellucida hardening (by similarity). {eco:0000250}.	secreted {eco:0000250}.	Q9UGM5|B7Z8T3|Q5J875|E9PG08
16	cg04458548	-0.283434	30815	36	9	187839394	NM_013443.3	ST6GALNAC6	Hs.109672	ST6 (alpha-N-acetyl-neuraminyl-2,3-beta-galactosyl-1,3)-N-acetylgalactosaminide alpha-2,6-sialyltransferase 6	||SIAT7-F||SIAT7F||ST6GALNACVI||ST6GALNAC6||sialyltransferase 7F||ST6GalNAc VI||galNAc alpha-2,6-sialyltransferase VI||ST6 (alpha-N-acetyl-neuraminyl-2,3-beta-galactosyl-1,3)-N-acetylgalactosaminide alpha-2,6-sialyltransferase 6||CMP-NeuAC:(beta)-N-acetylgalactosaminide (alpha)2,6-sialyltransferase member VI||ST6 ALPHA-N-ACETYL-NEURAMINYL-2,3-BETA-GALACTOSYL-1,3-N-ACETYLGALACTOSAMINIDE ALPHA-2,6-…	NP_038471	9	9q34.11	molecular function|alpha-N-acetylgalactosaminide alpha-2,6-sialyltransferase activity|ISS|GO:0001665|GOA|na//molecular function|sialyltransferase activity|IDA|GO:0008373|GOA|17123352//molecular function|sialyltransferase activity|ISS|GO:0008373|GOA|12668675//biological process|cell-cell recognition|IC|GO:0009988|GOA|12668675//biological process|ganglioside biosynthetic process|ISS|GO:0001574|GOA|…	alpha-2,6-sialyltransferase involved in the synthesis of alpha-series gangliosides. has activity toward gd1a, gt1b and gm1b. has no activity toward glycoproteins. responsible for the biosynthesis of dsgg (disialylgalactosylgloboside) from msgg (monosialylgalactosylgloboside) in normal and malignant kidney. participates in the synthesis of disialyl lewis a (le(a)). {eco:0000269|pubmed:12668675, ec…	golgi apparatus membrane {eco:0000250}; single-pass type ii membrane protein {eco:0000250}.	B4DU80|F6SGE3|Q969X2
17	cg04460372	-0.967941	25864	36	3	129700996	NM_015407.3	ABHD14A	Hs.534400	abhydrolase domain containing 14A	||ABHD14A||DORZ1||abhydrolase domain containing 14A||abhydrolase domain-containing protein 14A||alpha/beta hydrolase domain-containing protein 14A||	NP_056222	3	3p21.1	molecular function|hydrolase activity|IEA|GO:0016787|GOA|na//biological process|metabolic process|IEA|GO:0008152|GOA|na//cellular component|cytoplasm|IEA|GO:0005737|GOA|na//cellular component|extracellular vesicular exosome|IDA|GO:0070062|GOA|23376485//cellular component|integral component of membrane|IEA|GO:0016021|GOA|na	possible role in granule neuron development. {eco:0000250}.	cytoplasm {eco:0000250}. membrane {eco:0000305}; single-pass type ii membrane protein {eco:0000305}.	Q9BUJ0
18	cg04474832	-1.20367	79810	36	5	51983527	NM_024754.2	PTCD2	Hs.126906	pentatricopeptide repeat domain 2	||PTCD2||Pentatricopeptide repeat domain 2||PENTATRICOPEPTIDE REPEAT DOMAIN-CONTAINING PROTEIN 2||pentatricopeptide repeat-containing protein 2, mitochondrial isoform 4||pentatricopeptide repeat-containing protein 2, mitochondrial isoform 2||pentatricopeptide repeat-containing protein 2, mitochondrial isoform 3||pentatricopeptide repeat-containing protein 2, mitochondrial isoform 1||	NP_079030	5	5q13.2	molecular function|poly(A) RNA binding|IDA|GO:0044822|GOA|22658674//biological process|kidney development|IEA|GO:0001822|GOA|na//biological process|liver development|IEA|GO:0001889|GOA|na//biological process|mRNA processing|IEA|GO:0006397|GOA|na//biological process|mitochondrion organization|IEA|GO:0007005|GOA|na//biological process|muscle fiber development|IEA|GO:0048747|GOA|na//biological proce…	involved in mitochondrial rna maturation and mitochondrial respiratory chain function. {eco:0000250}.	mitochondrion {eco:0000269|pubmed:18729827}.	Q8WV60|B7Z8R2|F6S289|B3KPU6
19	cg04527989	0.67761	145581	36	14	71650508	NM_152447.2	LRFN5	Hs.136893	leucine rich repeat and fibronectin type III domain containing 5	||SALM5||LRFN5||C14orf146||FIGLER8||SYNAPTIC ADHESION-LIKE MOLECULE 5||LEUCINE-RICH REPEAT AND FIBRONECTIN TYPE III DOMAIN-CONTAINING PROTEIN 5||leucine-rich repeat and fibronectin type-III domain-containing protein 5 precursor||fibronectin type III, immunoglobulin and leucine rich repeat domains 8||leucine rich repeat and fibronectin type III domain containing 5||	NP_689660	14	14q21.1	cellular component|integral component of membrane|IEA|GO:0016021|GOA|na	cell adhesion molecule that mediates homophilic cell- cell adhesion in a ca(2+)-independent manner. promotes neurite outgrowth in hippocampal neurons. {eco:0000269|pubmed:18227064, eco:0000269|pubmed:18585462}.	membrane {eco:0000250}; single-pass type i membrane protein {eco:0000305}.	Q96NI6|G3V364
20	cg04784672	1.78624	7545	36	3	41147424	NM_003412.3	ZIC1	Hs.598590	Zic family member 1	||ZNF201||ZIC1||zinc finger protein 201||Zic family member 1||zinc finger protein ZIC 1||ZINC FINGER PROTEIN OF CEREBELLUM 1||Zinc finger protein of the cerebellum 1||Zic family member 1 (odd-paired homolog, Drosophila)||	NP_003403	3	3q24	molecular function|DNA binding|IEA|GO:0003677|GOA|na//molecular function|metal ion binding|IEA|GO:0046872|GOA|na//molecular function|sequence-specific DNA binding transcription factor activity|ISS|GO:0003700|GOA|na//molecular function|sequence-specific DNA binding transcription factor activity|TAS|GO:0003700|GOA|8542595//biological process|adult walking behavior|IEA|GO:0007628|GOA|na//biological …	acts as a transcriptional activator. involved in neurogenesis. plays important roles in the early stage of organogenesis of the cns, as well as during dorsal spinal cord development and maturation of the cerebellum. involved in the spatial distribution of mossy fiber (mf) neurons within the pontine gray nucleus (pgn). plays a role in the regulation of mf axon pathway choice. promotes mf migration…	nucleus. cytoplasm {eco:0000250}. note=localizes in the cytoplasm in presence of mdfic overexpression. {eco:0000250}.	Q15915
21	cg05073035	1.21604	1185	36	1	148609883	NM_021735.1	CLCN6	Hs.193043	chloride channel, voltage-sensitive 6	||CLC-6||CLC6||CLCN6||CHLORIDE CHANNEL 6||Chloride channel, voltage-sensitive 6||chloride transport protein 6 isoform 2||chloride transport protein 6 isoform 1||	NP_001277	1	1p36	molecular function|ATP binding|IEA|GO:0005524|GOA|na//molecular function|antiporter activity|IEA|GO:0015297|GOA|na//molecular function|voltage-gated chloride channel activity|NAS|GO:0005247|GOA|8543009//biological process|cell volume homeostasis|NAS|GO:0006884|GOA|8543009//biological process|chloride transport|NAS|GO:0006821|GOA|8543009//biological process|ion transmembrane transport|TAS|GO:00342…	chloride transport protein, initially identified as voltage-gated chloride channel. the presence of the conserved gating glutamate residues suggests that is functions as antiporter.	endosome membrane {eco:0000269|pubmed:17534424}; multi-pass membrane protein {eco:0000269|pubmed:17534424}. note=detected in detergent- resistant lipid rafts.	P51797
22	cg05228408	-0.609086	4635	36	17	11787939	NM_002476.2	MYL4	Hs.463300	myosin, light chain 4, alkali; atrial, embryonic	||ALC1||GT1||MYL4||AMLC||PRO1957||myosin light chain 4||EMBRYONIC/ATRIAL MYOSIN ALKALI LIGHT CHAIN||myosin, atrial/fetal muscle, light chain||myosin light chain alkali GT-1 isoform||Myosin, light chain 4, alkali; atrial, embryonic||MYOSIN, LIGHT CHAIN 4, ALKALI, ATRIAL, EMBRYONIC||myosin, light polypeptide 4, alkali; atrial, embryonic||myosin light chain 1, embryonic muscle/atrial isoform||	NP_002467	17	17q21.32	molecular function|actin filament binding|IMP|GO:0051015|GOA|9738905//molecular function|actin monomer binding|IDA|GO:0003785|GOA|9180271//molecular function|calcium ion binding|IEA|GO:0005509|GOA|na//molecular function|myosin II heavy chain binding|NAS|GO:0032038|GOA|16675844//biological process|cardiac muscle contraction|IMP|GO:0060048|GOA|14985854//biological process|muscle filament sliding|TA…	regulatory light chain of myosin. does not bind calcium.		P12829
23	cg05294455	0.910369	148345	36	1	42641608	NM_173507.1	C1orf127	Hs.127026	chromosome 1 open reading frame 127	||C1orf127||uncharacterized protein C1orf127 precursor||Chromosome 1 open reading frame 127||	NP_001164225	1	1p36.22	null	null	null	G8JLG8|B7ZLG7
24	cg05352668	-1.57137	973	36	19	10946343	NM_001783.2	CD79A	Hs.631567	CD79a molecule, immunoglobulin-associated alpha	||IGA||ig-alpha||CD79A||MEMBRANE-BOUND IMMUNOGLOBULIN IgM-ALPHA||surface IgM-associated protein||MB-1 membrane glycoprotein||membrane-bound immunoglobulin-associated protein||CD79a antigen (immunoglobulin-associated alpha)||CD79a molecule, immunoglobulin-associated alpha||B LYMPHOCYTE-SPECIFIC MB1 PROTEIN||B-cell antigen receptor complex-associated protein alpha chain isoform 2 precursor||B-cell …	NP_067612	19	19q13.2	molecular function|transmembrane signaling receptor activity|IEA|GO:0004888|GOA|na//biological process|B cell activation|ISS|GO:0042113|GOA|na//biological process|B cell differentiation|ISS|GO:0030183|GOA|na//biological process|B cell proliferation|ISS|GO:0042100|GOA|na//biological process|B cell receptor signaling pathway|ISS|GO:0050853|GOA|na//cellular component|B cell receptor complex|ISS|GO:0…	required in cooperation with cd79b for initiation of the signal transduction cascade activated by binding of antigen to the b-cell antigen receptor complex (bcr) which leads to internalization of the complex, trafficking to late endosomes and antigen presentation. also required for bcr surface expression and for efficient differentiation of pro- and pre-b-cells. stimulates syk autophosphorylation…	cell membrane; single-pass type i membrane protein. note=following antigen binding, the bcr has been shown to translocate from detergent-soluble regions of the cell membrane to lipid rafts although signal transduction through the complex can also occur outside lipid rafts. {eco:0000250}.	P11912
25	cg05921699	1.80024	112476	36	16	47072565	NM_145239.1	PRRT2	Hs.655071	proline-rich transmembrane protein 2	||BFIC2||FICCA||DSPB3||DYT10||PRRT2||PKC||IFITMD1||EKD1||BFIS2||Proline-rich transmembrane protein 2||infantile convulsions and paroxysmal choreoathetosis||dispanin subfamily B member 3||proline-rich transmembrane protein 2 isoform 1||proline-rich transmembrane protein 2 isoform 3||proline-rich transmembrane protein 2 isoform 2||interferon induced transmembrane protein domain containing 1||	NP_660282	16	16p11.2	biological process|neuromuscular process controlling posture|IMP|GO:0050884|GOA|22101681//biological process|response to biotic stimulus|IEA|GO:0009607|GOA|na//cellular component|cell junction|IEA|GO:0030054|GOA|na//cellular component|integral component of membrane|IEA|GO:0016021|GOA|na//cellular component|plasma membrane|IEA|GO:0005886|GOA|na//cellular component|synapse|IEA|GO:0045202|GOA|na		cell membrane {eco:0000269|pubmed:22101681}; multi-pass membrane protein {eco:0000269|pubmed:22101681}. cell junction, synapse {eco:0000250}.	Q7Z6L0
26	cg05995267	0.600433	2011	36	11	29730030	NM_017490.1	MARK2	Hs.567261	MAP/microtubule affinity-regulating kinase 2	||EMK-1||MARK2||2.7.11.1||2.7.11.26||Par1b||EMK1||PAR1 homolog b||MAP/microtubule affinity-regulating kinase 2||Ser/Thr protein kinase PAR-1B||ELKL motif kinase 1||serine/threonine protein kinase EMK||serine/threonine-protein kinase MARK2 isoform f||serine/threonine-protein kinase MARK2 isoform e||serine/threonine-protein kinase MARK2 isoform a||serine/threonine-protein kinase MARK2 isoform d||se…	NP_059672	11	11q13.1	molecular function|ATP binding|IDA|GO:0005524|GOA|14976552//molecular function|lipid binding|IEA|GO:0008289|GOA|na//molecular function|magnesium ion binding|IDA|GO:0000287|GOA|14976552//molecular function|poly(A) RNA binding|IDA|GO:0044822|GOA|22658674//molecular function|protein binding|IPI|GO:0005515|GOA|14676191//molecular function|protein kinase activator activity|TAS|GO:0030295|GOA|24522549/…	serine/threonine-protein kinase involved in cell polarity and microtubule dynamics regulation. phosphorylates crtc2/torc2, dcx, hdac7, kif13b, map2, map4, mapt/tau, and rab11fip2. plays a key role in cell polarity by phosphorylating the microtubule-associated proteins map2, map4 and mapt/tau at kxgs motifs, causing detachment from microtubules, and their disassembly. regulates epithelial cell pol…	cell membrane; peripheral membrane protein. cytoplasm. lateral cell membrane. cytoplasm, cytoskeleton. note=phosphorylation at thr-596 by prkcz/apkc and subsequent interaction with 14-3-3 protein ywhaz promotes relocation from the cell membrane to the cytoplasm.	Q7KZI7|A8K2S4|E9PC69
27	cg06204948	0.639127	939	36	12	63412666	NM_001242.3	CD27	Hs.355307	CD27 molecule	||CD27||Tp55||TNFRSF7||T14||S152. LPFS2||CD27L receptor||CD27 molecule||CD27 antigen precursor||T-CELL ACTIVATION ANTIGEN S152||T-cell activation antigen CD27||T cell activation antigen S152||tumor necrosis factor receptor superfamily, member 7||	NP_001233	12	12p13	molecular function|cysteine-type endopeptidase inhibitor activity involved in apoptotic process|IDA|GO:0043027|GOA|12324477//molecular function|protein binding|IPI|GO:0005515|GOA|12324477//molecular function|transmembrane signaling receptor activity|NAS|GO:0004888|GOA|14556986//biological process|cell surface receptor signaling pathway|NAS|GO:0007166|GOA|14556986//biological process|extrinsic apo…	receptor for cd70/cd27l. may play a role in survival of activated t-cells. may play a role in apoptosis through association with siva1.	membrane; single-pass type i membrane protein.	P26842
28	cg06495803	0.396327	114770	36	19	6553489	NM_052890.2	PGLYRP2	Hs.282244	peptidoglycan recognition protein 2	||PGLYRPL||tagL-alpha||3.5.1.28||PGLYRP2||PGRPL||HMFT0141||PGRP-L||TAGL-like||tagl-beta||N-acetylmuramoyl-L-alanine amidase precursor||PEPTIDOGLYCAN RECOGNITION PROTEIN, LONG||peptidoglycan recognition protein long||Peptidoglycan recognition protein 2||	NP_443122	19	19p13.12	molecular function|N-acetylmuramoyl-L-alanine amidase activity|TAS|GO:0008745|GOA|7663175//molecular function|peptidoglycan binding|IDA|GO:0042834|GOA|11461926//molecular function|peptidoglycan receptor activity|IDA|GO:0016019|GOA|11461926//molecular function|zinc ion binding|IEA|GO:0008270|GOA|na//biological process|defense response to Gram-positive bacterium|IDA|GO:0050830|GOA|11461926//biologi…	may play a scavenger role by digesting biologically active peptidoglycan (pgn) into biologically inactive fragments. has no direct bacteriolytic activity. {eco:0000269|pubmed:14506276}.	secreted. membrane.	Q96PD5
29	cg07408456	-2.02544	127343	36	1	15451532	NM_147192.2	DMBX1	Hs.375623	diencephalon/mesencephalon homeobox 1	||PAXB||OTX3||DMBX1||homeoprotein MBX||Diencephalon/mesencephalon homeobox 1||orthodenticle homolog 3||paired-like homeobox protein DMBX1||ORTHODENTICLE, DROSOPHILA, HOMOLOG OF, 3||diencephalon/mesencephalon homeobox protein 1 isoform a||diencephalon/mesencephalon homeobox protein 1 isoform b||	NP_757379	1	1p33	molecular function|DNA binding|ISS|GO:0003677|GOA|na//molecular function|protein heterodimerization activity|IEA|GO:0046982|GOA|na//molecular function|protein homodimerization activity|IEA|GO:0042803|GOA|na//molecular function|sequence-specific DNA binding|ISS|GO:0043565|GOA|na//molecular function|sequence-specific DNA binding transcription factor activity|ISS|GO:0003700|GOA|na//biological proces…	functions as a transcriptional repressor. may repress otx2-mediated transactivation by forming a heterodimer with otx2 on the p3c (5'-taatccgatta-3') sequence. required for brain development (by similarity). {eco:0000250}.	nucleus {eco:0000250|uniprotkb:o35137, eco:0000255|prosite-prorule:pru00108, eco:0000255|prosite- prorule:pru00138}.	Q8NFW5
30	cg08032971	0.688587	10200	36	16	46745323	NM_005792.1	MPHOSPH6	Hs.344400	M-phase phosphoprotein 6	||MPHOSPH6||MPP6||MPP-6||M-phase phosphoprotein 6||	NP_005783	16	16q23.3	molecular function|RNA binding|IEA|GO:0003723|GOA|na//molecular function|protein binding|IPI|GO:0005515|GOA|11719186//biological process|maturation of 5.8S rRNA|IMP|GO:0000460|GOA|17412707//cellular component|cytoplasm|IDA|GO:0005737|GOA|na//cellular component|exosome (RNase complex)|IDA|GO:0000178|GOA|20531389//cellular component|exosome (RNase complex)|IDA|GO:0000178|GOA|11719186//cellular comp…	rna-binding protein that associates with the rna exosome complex. involved in the 3'-processing of the 7s pre-rna to the mature 5.8s rrna and may play a role in recruiting the rna exosome complex to pre-rrna; this function may include c1d. {eco:0000269|pubmed:17412707}.	nucleus, nucleolus. cytoplasm. note=cytoplasmic in m phase.	Q99547
31	cg08355340	7.89603	6363	36	9	80761086	NM_006274.2	CCL19	Hs.50002	chemokine (C-C motif) ligand 19	||CKb11||SCYA19||MIP3B||CCL19||MIP-3b||ELC||MIP-3-beta||beta-chemokine exodus-3||CK beta-11||EXODUS 3||EBI1-ligand chemokine||EBI1 ligand chemokine||beta chemokine exodus-3||small-inducible cytokine A19||CC chemokine ligand 19||macrophage inflammatory protein 3-beta||CHEMOKINE, CC MOTIF, LIGAND 19||chemokine (C-C motif) ligand 19||macrophage inflammatory protein 3 beta||C-C motif chemokine 19 pre…	NP_006265	9	9p13	molecular function|CCR chemokine receptor binding|IPI|GO:0048020|GOA|20002784//molecular function|CCR10 chemokine receptor binding|IDA|GO:0031735|GOA|10706668//molecular function|CCR7 chemokine receptor binding|ISS|GO:0031732|GOA|na//molecular function|chemokine activity|IDA|GO:0008009|GOA|15778365//molecular function|chemokine receptor binding|IDA|GO:0042379|GOA|23341447//biological process|T ce…	may play a role not only in inflammatory and immunological responses but also in normal lymphocyte recirculation and homing. may play an important role in trafficking of t-cells in thymus, and t-cell and b-cell migration to secondary lymphoid organs. binds to chemokine receptor ccr7. recombinant ccl19 shows potent chemotactic activity for t-cells and b-cells but not for granulocytes and monocytes…	secreted.	Q99731|Q6IBD6
32	cg08418332	1.17367	145497	36	14	34681001	NM_194287.1	C14orf166B	Hs.147276	Chromosome 14 open reading frame 166B	||LRRC74A||C14orf166B||leucine-rich repeat-containing protein 74A||leucine rich repeat containing 74A||Chromosome 14 open reading frame 166B||	NP_919263	14	14q24.3	null	null	null	Q0VAA2|Q9Y628|B4DX10
33	cg08675585	-1.51924	84335	36	19	76362486	NM_032375.2	AKT1S1	Hs.515542	AKT1 substrate 1 (proline-rich)	||Lobe||PRAS40||AKT1S1||MGC2865||PROLINE-RICH AKT SUBSTRATE, 40-KD||AKT1 SUBSTRATE 1, PROLINE-RICH||AKT1 substrate 1 (proline-rich)||40 kDa proline-rich AKT substrate||proline-rich AKT1 substrate 1 isoform b||proline-rich AKT1 substrate 1 isoform a||	NP_115751	19	19q13.33	molecular function|protein binding|IPI|GO:0005515|GOA|12524439//biological process|Fc-epsilon receptor signaling pathway|TAS|GO:0038095|GOA|na//biological process|epidermal growth factor receptor signaling pathway|TAS|GO:0007173|GOA|na//biological process|fibroblast growth factor receptor signaling pathway|TAS|GO:0008543|GOA|na//biological process|innate immune response|TAS|GO:0045087|GOA|na//bio…	subunit of mtorc1, which regulates cell growth and survival in response to nutrient and hormonal signals. mtorc1 is activated in response to growth factors or amino acids. growth factor-stimulated mtorc1 activation involves a akt1-mediated phosphorylation of tsc1-tsc2, which leads to the activation of the rheb gtpase that potently activates the protein kinase activity of mtorc1. amino acid-signal…	cytoplasm, cytosol {eco:0000250}. note=found in the cytosolic fraction of the brain. {eco:0000250}.	Q96B36
34	cg08711674	1.11911	5898	36	7	50381878	NM_005402.2	RALA	Hs.6906	v-ral simian leukemia viral oncogene homolog A (ras related)	||RALA||RAS-like protein A||ras-related protein Ral-A precursor||ras related GTP binding protein A||Ras family small GTP binding protein RALA||v-ral simian leukemia viral oncogene homolog A (ras related)||	NP_005393	7	7p15-p13	molecular function|Edg-2 lysophosphatidic acid receptor binding|IDA|GO:0031755|GOA|19306925//molecular function|GTP binding|IEA|GO:0005525|GOA|na//molecular function|GTPase activity|IEA|GO:0003924|GOA|na//molecular function|protein binding|IPI|GO:0005515|GOA|10051605//biological process|GTP catabolic process|IEA|GO:0006184|GOA|na//biological process|Ras protein signal transduction|TAS|GO:0007265|…	multifunctional gtpase involved in a variety of cellular processes including gene expression, cell migration, cell proliferation, oncogenic transformation and membrane trafficking. accomplishes its multiple functions by interacting with distinct downstream effectors. acts as a gtp sensor for gtp-dependent exocytosis of dense core vesicles. plays a role in the early stages of cytokinesis and is re…	cell surface. cell membrane; lipid-anchor; cytoplasmic side. cleavage furrow. midbody. note=prior to lpa treatment found predominantly at the cell surface and in the presence of lpa colocalizes with lpar1 and lpar2 in the endocytic vesicles. during early cytokinesis localizes at the cleavage furrow membrane. colocalizes with exoc2 at the early midbody ring and persists there till maturation of th…	P11233
35	cg08724636	-6.99653	90427	36	15	39630281	NM_001003940.1	BMF	Hs.591104	Bcl2 modifying factor	||BMF||BCL2-MODIFYING FACTOR||Bcl2 modifying factor||bcl-2-modifying factor isoform bmf-3||bcl-2-modifying factor isoform bmf-2||bcl-2-modifying factor isoform bmf-1||	NP_277038	15	15q14	molecular function|protein binding|IPI|GO:0005515|GOA|11546872//biological process|anoikis|IDA|GO:0043276|GOA|11546872//biological process|apoptotic process|TAS|GO:0006915|GOA|na//biological process|intrinsic apoptotic signaling pathway|TAS|GO:0097193|GOA|na//biological process|negative regulation of apoptotic signaling pathway|IEA|GO:2001234|GOA|na//biological process|positive regulation of intr…	may play a role in apoptosis. isoform 1 seems to be the main initiator.		Q96LC9
36	cg08733315	-6.46854	1003	36	16	38188355	NM_001795.2	CDH5	Hs.76206	cadherin 5, type 2 (vascular endothelium)	||CDH5||cd144 antigen||endothelial-specific cadherin||cadherin-5 preproprotein||7B4 antigen||vascular endothelial cadherin||CADHERIN, VASCULAR ENDOTHELIAL, 1||Cadherin 5, type 2 (vascular endothelium)||cadherin 5, type 2, VE-cadherin (vascular epithelium)||	NP_001786	16	16q22.1	molecular function|beta-catenin binding|IPI|GO:0008013|GOA|18287330//molecular function|calcium ion binding|IEA|GO:0005509|GOA|na//molecular function|ion channel binding|IPI|GO:0044325|GOA|19996314//molecular function|protein binding|IPI|GO:0005515|GOA|17057644//molecular function|protein phosphatase binding|IEA|GO:0019903|GOA|na//molecular function|receptor binding|IPI|GO:0005102|GOA|12088286//b…	cadherins are calcium-dependent cell adhesion proteins. they preferentially interact with themselves in a homophilic manner in connecting cells; cadherins may thus contribute to the sorting of heterogeneous cell types. this cadherin may play a important role in endothelial cell biology through control of the cohesion and organization of the intercellular junctions. it associates with alpha-cateni…	cell junction {eco:0000269|pubmed:20332120}. cell membrane {eco:0000305|pubmed:20332120}; single-pass type i membrane protein {eco:0000305|pubmed:20332120}. note=found at cell-cell boundaries and probably at cell-matrix boundaries. krit1 and cdh5 reciprocally regulate their localization to endothelial cell-cell junctions.	P33151
37	cg08872742	0.940541	23429	36	3	64957821	NM_012234.3	RYBP	Hs.7910	RING1 and YY1 binding protein	||YEAF1||DEDAF||APAP-1||RYBP||AAP1||DED-associated factor||ring1 interactor RYBP||apoptin-associating protein 1||RING1- AND YY1-BINDING PROTEIN||RING1 and YY1-binding protein||death effector domain-associated factor||YY1- AND E4TF1/GABP-ASSOCIATED FACTOR 1||YY1 and E4TF1-associated factor 1||RING1 and YY1 binding protein||YY1 and E4TF1 associated factor 1||	NP_036366	3	3p13	molecular function|DNA binding|IEA|GO:0003677|GOA|na//molecular function|protein binding|IPI|GO:0005515|GOA|16189514//molecular function|transcription corepressor activity|IEA|GO:0003714|GOA|na//molecular function|zinc ion binding|IEA|GO:0008270|GOA|na//biological process|apoptotic process|IEA|GO:0006915|GOA|na//biological process|histone H2A monoubiquitination|IDA|GO:0035518|GOA|16943429//biolog…	inhibits ubiquitination and subsequent degradation of tp53, and thereby plays a role in regulating transcription of tp53 target genes. may be implicated in the regulation of the transcription as a repressor of the transcriptional activity of e4tf1. may bind to dna. promotes apoptosis. {eco:0000269|pubmed:11395500, eco:0000269|pubmed:11953439, eco:0000269|pubmed:14765135, eco:0000269|pubmed:190987…	nucleus. cytoplasm. nucleus, nucleoplasm {eco:0000250}. note=primarily found in the nucleus. detected in a punctate pattern likely to represent polycomb group (pcg) bodies (by similarity). {eco:0000250}.	Q8N488
38	cg09013626	0.613838	158293	36	9	72578362	NM_198841.1	FAM120AOS	Hs.350364	family with sequence similarity 120A opposite strand	||FAM120AOS||C9orf10OS||putative FAM120A opposite strand protein||family with sequence similarity 120A opposite strand||	NP_942138	9	9q22.31	null	null	null	Q5T036
39	cg09600829	-0.732377	128178	36	1	95255873	NM_080738.2	EDARADD	Hs.352224	EDAR-associated death domain	||EDA3||ECTD11B||EDARADD||ED3||ECTD11A||crinkled homolog||EDAR-associated death domain||EDAR-associated death domain protein||ectodysplasin-A receptor-associated adapter protein isoform A||ectodysplasin-A receptor-associated adapter protein isoform B||ectodysplasia A receptor associated death domain||ectodysplasin A receptor associated adapter protein||	NP_665860	1	1q42.3	biological process|cell differentiation|IEA|GO:0030154|GOA|na//biological process|hair follicle development|IEA|GO:0001942|GOA|na//biological process|odontogenesis of dentin-containing tooth|IEA|GO:0042475|GOA|na//biological process|signal transduction|IEA|GO:0007165|GOA|na//biological process|trachea gland development|IEA|GO:0061153|GOA|na//cellular component|cytoplasm|IEA|GO:0005737|GOA|na	adapter protein that interacts with edar death domain and couples the receptor to eda signaling pathway during morphogenesis of ectodermal organs. mediates the activation of nf- kappa-b. {eco:0000269|pubmed:11882293}.	cytoplasm {eco:0000305}.	Q8WWZ3
40	cg09809672	-0.614857	8303	36	16	234624305	NM_003498.3	SNN	Hs.618526	stannin	||SNN||AG8_1||Stannin||	NP_003489	16	16p13	biological process|response to abiotic stimulus|TAS|GO:0009628|GOA|9657854//biological process|response to stress|TAS|GO:0006950|GOA|9657854//cellular component|integral component of membrane|IEA|GO:0016021|GOA|na//cellular component|mitochondrial outer membrane|IEA|GO:0005741|GOA|na	plays a role in the toxic effects of organotins.	mitochondrion outer membrane {eco:0000269|pubmed:16246365}; single-pass membrane protein {eco:0000269|pubmed:16246365}.	O75324
41	cg09816471	1.51644	10501	36	19	11669361	NM_020241.2	SEMA6B	Hs.465642	sema domain, transmembrane domain (TM), and cytoplasmic domain, (semaphorin) 6B	||SEMA6B||SEMA-VIB||SEMAN||semaphorin-6Ba||semaZ||SEM-SEMA-Y||semaphorin VIB||semaphorin-6B precursor||SEMAPHORIN 6B||semaphorin Z||sema domain, transmembrane domain (TM), and cytoplasmic domain, (semaphorin) 6B||	NP_115484	19	19p13.3	molecular function|receptor activity|IEA|GO:0004872|GOA|na//molecular function|semaphorin receptor binding|IEA|GO:0030215|GOA|na//biological process|cell differentiation|IEA|GO:0030154|GOA|na//biological process|nervous system development|IEA|GO:0007399|GOA|na//cellular component|integral component of membrane|IEA|GO:0016021|GOA|na//cellular component|plasma membrane|IEA|GO:0005886|GOA|na	may play a role in both peripheral and central nervous system development. {eco:0000250}.	cell membrane; single-pass type i membrane protein.	Q9H3T3
42	cg10052840	-0.923537	284467	36	1	4509119	NM_182759.2	FAM19A3	Hs.439116	family with sequence similarity 19 (chemokine (C-C motif)-like), member A3	||TAFA3||FAM19A3||chemokine-like protein TAFA-3||protein FAM19A3 isoform 2 precursor||protein FAM19A3 isoform 1 precursor||family with sequence similarity 19 (chemokine (C-C motif)-like), member A3||	NP_877436	1	1p13.2	cellular component|extracellular region|IEA|GO:0005576|GOA|na		secreted {eco:0000269|pubmed:15028294}.	Q7Z5A8
43	cg10834677	0.797599	8557	36	17	113064812	NM_003673.2	TCAP	Hs.77628	titin-cap	||CMD1N||LGMD2G||T-cap||TCAP||telethonin||Titin-cap||titin cap protein||19 kDa sarcomeric protein||limb girdle muscular dystrophy 2G (autosomal recessive)||	NP_003664	17	17q12	molecular function|BMP binding|IPI|GO:0036122|GOA|17921333//molecular function|FATZ binding|IPI|GO:0051373|GOA|15582318//molecular function|ion channel binding|IPI|GO:0044325|GOA|11697903//molecular function|protein binding|IPI|GO:0005515|GOA|10984498//molecular function|protein binding, bridging|IDA|GO:0030674|GOA|15582318//molecular function|structural constituent of muscle|IMP|GO:0008307|GOA|9…	muscle assembly regulating factor. mediates the antiparallel assembly of titin (ttn) molecules at the sarcomeric z-disk.	cytoplasm, myofibril, sarcomere {eco:0000269|pubmed:16713295}.	A2TDC0|O15273
44	cg10986043	-2.37944	1572	36	19	35074021	NM_000774.3	CYP2F1	Hs.558318	cytochrome P450, family 2, subfamily F, polypeptide 1	||CYP2F1||CYPIIF1||1.14.14.1||C2F1||microsomal monooxygenase||flavoprotein-linked monooxygenase||xenobiotic monooxygenase||cytochrome P450 2F1 precursor||cytochrome P450, subfamily IIF, polypeptide 1||cytochrome P450, family 2, subfamily F, polypeptide 1||	NP_000765	19	19q13.2	molecular function|arachidonic acid epoxygenase activity|IBA|GO:0008392|GOA|na//molecular function|aromatase activity|IEA|GO:0070330|GOA|na//molecular function|heme binding|IBA|GO:0020037|GOA|na//molecular function|iron ion binding|IEA|GO:0005506|GOA|na//molecular function|monooxygenase activity|TAS|GO:0004497|GOA|1974816//molecular function|oxidoreductase activity, acting on paired donors, with …	may be involved in the metabolism of various pneumotoxicants including naphthalene. is able to dealkylate ethoxycoumarin, propoxycoumarin, and pentoxyresorufin but possesses no activity toward ethoxyresorufin and only trace dearylation activity toward benzyloxyresorufin. bioactivates 3- methylindole (3mi) by dehydrogenation to the putative electrophile 3-methylene-indolenine. {eco:0000269|pubmed:…	endoplasmic reticulum membrane {eco:0000305|pubmed:10383923}; peripheral membrane protein {eco:0000305|pubmed:10383923}. microsome membrane {eco:0000269|pubmed:10383923}; peripheral membrane protein {eco:0000269|pubmed:10383923}.	P24903
45	cg11267879	-0.554874	54941	36	18	46311792	NM_017831.2	RNF125	Hs.633703	ring finger protein 125, E3 ubiquitin protein ligase	||TRAC-1||6.3.2.-||RNF125||TRAC1||E3 ubiquitin-protein ligase RNF125||T-cell RING activation protein 1||T-cell ring protein identified in activation screen||ring finger protein 125, E3 ubiquitin protein ligase||	NP_060301	18	18q12.1	molecular function|ligase activity|IEA|GO:0016874|GOA|na//molecular function|ubiquitin-protein transferase activity|IEA|GO:0004842|GOA|na//molecular function|zinc ion binding|IEA|GO:0008270|GOA|na//biological process|innate immune response|TAS|GO:0045087|GOA|na//biological process|negative regulation of type I interferon production|TAS|GO:0032480|GOA|na//biological process|protein ubiquitination|…	e3 ubiquitin-protein ligase that acts as a positive regulator of t-cell activation. e3 ligase proteins mediate ubiquitination and subsequent proteasomal degradation of target proteins. {eco:0000269|pubmed:15843525}.		Q96EQ8
46	cg11314292	-3.38499	55068	36	13	29598433	NM_017993.1	ENOX1	Hs.128258	ecto-NOX disulfide-thiol exchanger 1	||PIG38||cCNOX||bA64J21.1||ENOX1||constitutive Ecto-NOX||ecto-NOX disulfide-thiol exchanger 1||cell proliferation-inducing gene 38 protein||candidate growth-related and time keeping constitutive hydroquinone (NADH) oxidase||candidate growth-related and time keeping constitutive hydroquinone [NADH] oxidase||	NP_060463	13	13q14.11	molecular function|nucleic acid binding|IEA|GO:0003676|GOA|na//molecular function|nucleotide binding|IEA|GO:0000166|GOA|na//molecular function|oxidoreductase activity|IEA|GO:0016491|GOA|na//biological process|oxidation-reduction process|IEA|GO:0055114|GOA|na//biological process|rhythmic process|IEA|GO:0048511|GOA|na//cellular component|extracellular space|IEA|GO:0005615|GOA|na//cellular component…	probably acts as a terminal oxidase of plasma electron transport from cytosolic nad(p)h via hydroquinones to acceptors at the cell surface. hydroquinone oxidase activity alternates with a protein disulfide-thiol interchange/oxidoreductase activity which may control physical membrane displacements associated with vesicle budding or cell enlargement. the activities oscillate with a period length of…	cell membrane {eco:0000269|pubmed:11360993}. secreted, extracellular space {eco:0000269|pubmed:11360993}. note=extracellular and plasma membrane-associated.	Q8TC92
47	cg11635563	-0.586381	284459	36	19	44241849	NM_181786	HKR1	Hs.729090	HKR1, GLI-Kruppel zinc finger family member	||ZNF875||HKR1||oncogene HKR1||GLI-Kruppel family member HKR1||zinc finger protein 875||Krueppel-related zinc finger protein 1||HKR1, GLI-Kruppel zinc finger family member||	NP_861451	19	19q13.12	molecular function|DNA binding|IEA|GO:0003677|GOA|na//molecular function|metal ion binding|IEA|GO:0046872|GOA|na//biological process|multicellular organismal development|NAS|GO:0007275|GOA|2850480//biological process|regulation of transcription, DNA-templated|NAS|GO:0006355|GOA|2850480//biological process|transcription, DNA-templated|IEA|GO:0006351|GOA|na//cellular component|nucleus|IEA|GO:000563…	may be involved in transcriptional regulation.	nucleus {eco:0000305}.	null
48	cg12024906	1.17758	5287	36	1	37825679	NM_002646.2	PIK3C2B	Hs.497487	phosphatidylinositol-4-phosphate 3-kinase, catalytic subunit type 2 beta	||C2-PI3K||PIK3C2B||PI3K-C2beta||2.7.1.154||PI3K-C2-beta||phosphoinositide 3-kinase-C2-beta||PTDINS-3-kinase C2 beta||ptdIns-3-kinase C2 subunit beta||PHOSPHATIDYLINOSITOL 3-KINASE, CLASS 2, BETA||phosphoinositide-3-kinase, class 2, beta polypeptide||phosphatidylinositol 3-kinase C2 domain-containing beta polypeptide||phosphatidylinositol-4-phosphate 3-kinase C2 domain-containing subunit beta||ph…	NP_002637	1	1q32	molecular function|1-phosphatidylinositol-3-kinase activity|IBA|GO:0016303|GOA|na//molecular function|1-phosphatidylinositol-4-phosphate 3-kinase activity|NAS|GO:0035005|GOA|9830063//molecular function|ATP binding|IEA|GO:0005524|GOA|na//molecular function|lipid kinase activity|IEA|GO:0001727|GOA|na//molecular function|phosphatidylinositol binding|IEA|GO:0035091|GOA|na//molecular function|protein …	phosphorylates ptdins and ptdins4p with a preference for ptdins. does not phosphorylate ptdins(4,5)p2. may be involved in egf and pdgf signaling cascades. {eco:0000269|pubmed:10805725}.	microsome {eco:0000269|pubmed:14563213}. cell membrane {eco:0000269|pubmed:14563213}. cytoplasm, cytosol {eco:0000269|pubmed:14563213}. nucleus {eco:0000269|pubmed:14563213}. endoplasmic reticulum {eco:0000269|pubmed:14563213}. note=found mostly in the microsome, but also in the plasma membrane and cytosol. nuclear in testis.	O00750|A2RUF7
49	cg12467090	1.86097	3835	36	16	202725762	NM_007317.1	KIF22	Hs.612151	kinesin family member 22	||KNSL4||KIF22||KID||OBP-2||A-328A3.2||OBP-1||SEMDJL2||KINESIN-LIKE 4||ORIP-BINDING PROTEIN||oriP binding protein||kinesin-like protein 4||Kinesin family member 22||kinesin-like DNA-binding protein pseudogene||kinesin-like protein KIF22 isoform 1||kinesin-like protein KIF22 isoform 2||origin of plasmid DNA replication-binding protein||	NP_015556	16	16p11.2	molecular function|ATP binding|IEA|GO:0005524|GOA|na//molecular function|ATPase activity|IBA|GO:0016887|GOA|na//molecular function|DNA binding|IEA|GO:0003677|GOA|na//molecular function|microtubule binding|IEA|GO:0008017|GOA|na//molecular function|microtubule motor activity|IBA|GO:0003777|GOA|na//biological process|ATP catabolic process|IBA|GO:0006200|GOA|na//biological process|DNA repair|IEA|GO:0…	kinesin family that is involved in spindle formation and the movements of chromosomes during mitosis and meiosis. binds to microtubules and to dna.	nucleus. cytoplasm, cytoskeleton {eco:0000305}.	Q14807|B7Z9T5
50	cg12688670	0.186533	29121	36	12	29709103	NM_001004419.1	CLEC2D	Hs.268326	C-type lectin domain family 2, member D	||OCIL||CLEC2D||CLAX||LLT-1||LLT1||lectin-like transcript 1||osteoclast inhibitory lectin||C-type lectin related f||lectin-like NK cell receptor||NATURAL KILLER CELL LECTIN-LIKE RECEPTOR||C-type lectin superfamily 2, member D||C-type lectin domain family 2, member D||C-type lectin domain family 2 member D isoform 3||C-type lectin domain family 2 member D isoform 1||C-type lectin domain family 2 m…	NP_037401	12	12p13	molecular function|carbohydrate binding|IEA|GO:0030246|GOA|na//molecular function|transmembrane signaling receptor activity|TAS|GO:0004888|GOA|10541800//biological process|cell surface receptor signaling pathway|TAS|GO:0007166|GOA|10541800//cellular component|cell surface|IDA|GO:0009986|GOA|20843815//cellular component|endoplasmic reticulum|IDA|GO:0005783|GOA|20843815//cellular component|integral…	receptor for klrb1 that protects target cells against natural killer cell-mediated lysis. inhibits osteoclast formation. inhibits bone resorption. modulates the release of interferon- gamma. binds high molecular weight sulfated glycosaminoglycans. {eco:0000269|pubmed:14753741, eco:0000269|pubmed:15104121, eco:0000269|pubmed:16339513}.	isoform 4: endoplasmic reticulum.	Q9UHP7|W8JXM2
51	cg12810837	-1.30594	220296	36	11	9713554	NM_152722.3	HEPACAM	Hs.745294	hepatic and glial cell adhesion molecule	||MLC2B||GlialCAM||HEPACAM||MLC2A||protein hepaCAM||hepatocyte cell adhesion molecule precursor||HEPATOCYTE AND GLIAL CELL ADHESION MOLECULE||Hepatic and glial cell adhesion molecule||	NP_689935	11	11q24.2	biological process|cell adhesion|IEA|GO:0007155|GOA|na//biological process|cell cycle arrest|IEA|GO:0007050|GOA|na//biological process|cellular protein localization|IEA|GO:0034613|GOA|na//biological process|regulation of growth|IEA|GO:0040008|GOA|na//cellular component|axon|IDA|GO:0030424|GOA|21419380//cellular component|cell-cell junction|IDA|GO:0005911|GOA|21419380//cellular component|cytoplasm…	involved in regulating cell motility and cell-matrix interactions. may inhibit cell growth through suppression of cell proliferation. {eco:0000269|pubmed:15885354, eco:0000269|pubmed:15917256}.	cytoplasm {eco:0000269|pubmed:15885354, eco:0000269|pubmed:15917256}. membrane; single-pass type i membrane protein; cytoplasmic side {eco:0000269|pubmed:15885354, eco:0000269|pubmed:15917256}. note=in mcf-7 breast carcinoma and hepatic hep 3b2.1-7 and hep-g2 cell lines, localization of hepacam is cell density-dependent. in well spread cells, localized to punctate structures in the perinuclear me…	Q14CZ8
52	cg13018903	0.152892	55267	36	22	124312111	NM_018280.1	PRR34	Hs.567529	proline rich 34	||PRR34||C22orf26||proline-rich protein 34||proline rich 34||Chromosome 22 open reading frame 26||	NP_060750	22	22q13.31	null	null	null	Q9NV39
53	cg13269407	-0.157006	9698	36	1	44828771	NM_001020658.1	PUM1	Hs.281707	pumilio RNA-binding family member 1	||KIAA0099||HSPUM||PUML1||PUMH1||pumilio-1||PUM1||Pumilio homolog 1 (Drosophila)||pumilio RNA-binding family member 1||pumilio homolog 1 isoform 1||pumilio homolog 1 isoform 2||PUMILIO, DROSOPHILA, HOMOLOG OF, 1||	NP_055491	1	1p35.2	molecular function|poly(A) RNA binding|IDA|GO:0044822|GOA|22658674//biological process|membrane organization|TAS|GO:0061024|GOA|na//biological process|post-Golgi vesicle-mediated transport|TAS|GO:0006892|GOA|na//biological process|regulation of translation|IEA|GO:0006417|GOA|na//cellular component|cytosol|TAS|GO:0005829|GOA|na	sequence-specific rna-binding protein that negatively regulates translation and mrna stability by binding the 3'-utr of mrna targets. binds to an rna consensus sequence, the pumilio response element (pre), 5'-uguanaua-3', that is related to the nanos response element (nre). capable of deadenylation-dependent and -independent modes of repression. may be required to support proliferation and self-r…	cytoplasm {eco:0000305}.	Q14671
54	cg13436343	3.64662	11346	36	5	31538432	NM_007286.3	SYNPO	Hs.435228	synaptopodin	||SYNPO||KIAA1029||Synaptopodin||synaptopodin isoform C||synaptopodin isoform A||synaptopodin isoform B||	NP_009217	5	5q33.1	molecular function|actin binding|ISS|GO:0003779|GOA|na//molecular function|protein binding|IPI|GO:0005515|GOA|15841212//biological process|positive regulation of actin filament bundle assembly|IEA|GO:0032233|GOA|na//biological process|positive regulation of actin filament bundle assembly|ISS|GO:0032233|GOA|na//biological process|regulation of stress fiber assembly|IEA|GO:0051492|GOA|na//biologica…	actin-associated protein that may play a role in modulating actin-based shape and motility of dendritic spines and renal podocyte foot processes. seems to be essential for the formation of spine apparatuses in spines of telencephalic neurons, which is involved in synaptic plasticity (by similarity). {eco:0000250}.	cytoplasm, cytoskeleton {eco:0000250}. cell junction, tight junction {eco:0000250}. perikaryon {eco:0000250}. cell projection, dendritic spine {eco:0000250}. cell junction, synapse, postsynaptic cell membrane, postsynaptic density {eco:0000250}. cell junction, synapse {eco:0000250}. note=localized at the tight junction of cells. in brain, localized to the postsynaptic densities and in the perikar…	Q8N3V7
55	cg13590277	1.59107	256691	36	9	149999689	NM_153267.3	MAMDC2	Hs.547172	MAM domain containing 2	||mamcan||MAMDC2||MAM DOMAIN-CONTAINING 2||MAM domain-containing proteoglycan||MAM domain containing 1||MAM domain containing 2||MAM domain-containing protein 2 precursor||	NP_694999	9	9q21.12	molecular function|glycosaminoglycan binding|IEA|GO:0005539|GOA|na//biological process|peptide cross-linking via chondroitin 4-sulfate glycosaminoglycan|IEA|GO:0019800|GOA|na//cellular component|endoplasmic reticulum|IDA|GO:0005783|GOA|na//cellular component|interstitial matrix|IEA|GO:0005614|GOA|na//cellular component|membrane|IEA|GO:0016020|GOA|na		secreted, extracellular space, extracellular matrix {eco:0000250}.	Q7Z304
56	cg13870494	0.189212	56342	36	19	71848178	NM_020230.4	PPAN	Hs.14468	peter pan homolog (Drosophila)	||P2RY11||P2Y purinoceptor 11||purinergic receptor P2Y11||P2RY11 P2RY11/PPAN SPLICED READ-THROUGH TRANSCRIPT||purinergic receptor P2Y, G-protein coupled, 11||PURINERGIC RECEPTOR P2Y, G PROTEIN-COUPLED, 11||	NP_064615	19	19p13	molecular function|poly(A) RNA binding|IDA|GO:0044822|GOA|22658674//biological process|RNA splicing|TAS|GO:0008380|GOA|10944437//cellular component|nucleolus|IEA|GO:0005730|GOA|na//cellular component|nucleus|IDA|GO:0005634|GOA|15302935	may have a role in cell growth.	nucleus, nucleolus {eco:0000269|pubmed:12429849}.	Q9NQ55
57	cg13946500	-3.8508	8482	36	15	10078312	NM_003612.1	SEMA7A	Hs.24640	semaphorin 7A, GPI membrane anchor (John Milton Hagen blood group)	||H-Sema-L||H-SEMA-K1||SEMAL||CDw108||SEMAK1||semaphorin-K1||semaphorin-L||CD108||SEMA7A||semaphorin L||semaphorin K1||sema L||semaphorin-7A isoform 3||semaphorin-7A isoform 1 preproprotein||JMH blood group antigen||semaphorin-7A isoform 2 preproprotein||john-Milton-Hargen human blood group Ag||John Milton Hagen blood group H-Sema K1||semaphorin 7A, GPI membrane anchor (John Milton Hagen blood gr…	NP_003603	15	15q22.3-q23	molecular function|integrin binding|IEA|GO:0005178|GOA|na//molecular function|protein binding|IPI|GO:0005515|GOA|17474147//molecular function|receptor activity|IEA|GO:0004872|GOA|na//biological process|axon extension|IEA|GO:0048675|GOA|na//biological process|axon guidance|TAS|GO:0007411|GOA|na//biological process|immune response|TAS|GO:0006955|GOA|9721204//biological process|inflammatory response…	plays an important role in integrin-mediated signaling and functions both in regulating cell migration and immune responses. promotes formation of focal adhesion complexes, activation of the protein kinase ptk2/fak1 and subsequent phosphorylation of mapk1 and mapk3. promotes production of proinflammatory cytokines by monocytes and macrophages. plays an important role in modulating inflammation an…	cell membrane {eco:0000269|pubmed:10201933, eco:0000269|pubmed:17671519, eco:0000269|pubmed:9712866}; lipid- anchor, gpi-anchor {eco:0000269|pubmed:10201933, eco:0000269|pubmed:17671519, eco:0000269|pubmed:9712866}; extracellular side {eco:0000269|pubmed:10201933, eco:0000269|pubmed:17671519, eco:0000269|pubmed:9712866}. note=detected in a punctate pattern on the cell membrane of basal and supra-…	F5GYX3|O75326
58	cg14093936	-0.902373	2048	36	1	72513667	NM_004442.5	EPHB2	Hs.523329	EPH receptor B2	||CAPB||EPHB2||ERK||DRT||2.7.10.1||PCBC||EPHT3||EPHRIN RECEPTOR EphB2||elk-related tyrosine kinase||EPH receptor B2||EPH-like kinase 5||tyrosine-protein kinase TYRO5||protein-tyrosine kinase HEK5||eph tyrosine kinase 3||renal carcinoma antigen NY-REN-47||developmentally-regulated Eph-related tyrosine kinase||tyrosine-protein kinase receptor EPH-3||DEVELOPMENTALLY REGULATED EPH-RELATED TYROSINE KI…	NP_059145	1	1p36.1-p35	molecular function|ATP binding|IEA|GO:0005524|GOA|na//molecular function|axon guidance receptor activity|IEA|GO:0008046|GOA|na//molecular function|protein binding|IPI|GO:0005515|GOA|17255949//molecular function|protein tyrosine kinase activity|ISS|GO:0004713|GOA|na//molecular function|receptor binding|IEA|GO:0005102|GOA|na//molecular function|transmembrane-ephrin receptor activity|ISS|GO:0005005|…	receptor tyrosine kinase which binds promiscuously transmembrane ephrin-b family ligands residing on adjacent cells, leading to contact-dependent bidirectional signaling into neighboring cells. the signaling pathway downstream of the receptor is referred to as forward signaling while the signaling pathway downstream of the ephrin ligand is referred to as reverse signaling. functions in axon guida…	cell membrane; single-pass type i membrane protein. cell projection, axon {eco:0000250}. cell projection, dendrite {eco:0000250}.	P29323
59	cg14271400	5.71069	7545	36	3	22909567	NM_003412.3	ZIC1	Hs.598590	Zic family member 1	||ZNF201||ZIC1||zinc finger protein 201||Zic family member 1||zinc finger protein ZIC 1||ZINC FINGER PROTEIN OF CEREBELLUM 1||Zinc finger protein of the cerebellum 1||Zic family member 1 (odd-paired homolog, Drosophila)||	NP_003403	3	3q24	molecular function|DNA binding|IEA|GO:0003677|GOA|na//molecular function|metal ion binding|IEA|GO:0046872|GOA|na//molecular function|sequence-specific DNA binding transcription factor activity|ISS|GO:0003700|GOA|na//molecular function|sequence-specific DNA binding transcription factor activity|TAS|GO:0003700|GOA|8542595//biological process|adult walking behavior|IEA|GO:0007628|GOA|na//biological …	acts as a transcriptional activator. involved in neurogenesis. plays important roles in the early stage of organogenesis of the cns, as well as during dorsal spinal cord development and maturation of the cerebellum. involved in the spatial distribution of mossy fiber (mf) neurons within the pontine gray nucleus (pgn). plays a role in the regulation of mf axon pathway choice. promotes mf migration…	nucleus. cytoplasm {eco:0000250}. note=localizes in the cytoplasm in presence of mdfic overexpression. {eco:0000250}.	Q15915
60	cg14456683	2.07157	51246	36	3	147127010	NM_016479.3	SHISA5	Hs.414579	shisa family member 5	||SCOTIN||SHISA5||putative NF-kappa-B-activating protein 120||protein shisa-5 isoform c||protein shisa-5 isoform e||protein shisa-5 isoform d||shisa family member 5||protein shisa-5 isoform b precursor||Shisa homolog 5 (Xenopus laevis)||SHISA, XENOPUS, HOMOLOG OF, 5||protein shisa-5 isoform a precursor||	NP_057563	3	3p21.31	molecular function|WW domain binding|IPI|GO:0050699|GOA|15064722//molecular function|protein binding|IPI|GO:0005515|GOA|15064722//molecular function|signal transducer activity|IMP|GO:0004871|GOA|12761501//biological process|intrinsic apoptotic signaling pathway in response to DNA damage by p53 class mediator|IEA|GO:0042771|GOA|na//biological process|positive regulation of I-kappaB kinase/NF-kappa…	can induce apoptosis in a caspase-dependent manner and plays a role in p53/tp53-dependent apoptosis. {eco:0000269|pubmed:12135983}.	endoplasmic reticulum membrane {eco:0000269|pubmed:12135983}; single-pass type i membrane protein {eco:0000269|pubmed:12135983}. nucleus membrane {eco:0000269|pubmed:12135983}.	Q8N114
61	cg14494596	1.37177	6392	36	11	48517044	NM_003002.1	SDHD	Hs.356270	succinate dehydrogenase complex, subunit D, integral membrane protein		NP_002993	11	11q23	molecular function|electron carrier activity|TAS|GO:0009055|GOA|9533030//molecular function|heme binding|ISS|GO:0020037|GOA|na//molecular function|metal ion binding|IEA|GO:0046872|GOA|na//molecular function|succinate dehydrogenase activity|IDA|GO:0000104|GOA|9533030//molecular function|ubiquinone binding|ISS|GO:0048039|GOA|na//biological process|cellular metabolic process|TAS|GO:0044237|GOA|na//b…	membrane-anchoring subunit of succinate dehydrogenase (sdh) that is involved in complex ii of the mitochondrial electron transport chain and is responsible for transferring electrons from succinate to ubiquinone (coenzyme q). {eco:0000250}.	mitochondrion inner membrane; multi-pass membrane protein.	O14521
62	cg14839898	1.81535	5088	36	3	111461572	null	null	null	null	null	null	null	null	null	null	null	null
63	cg15051063	1.36666	201292	36	17	142893947	NM_173547.2	TRIM65	Hs.189823	tripartite motif containing 65	||4732463G12Rik||TRIM65||Tripartite motif containing 65||tripartite motif-containing protein 65 isoform 1||tripartite motif-containing protein 65 isoform 2||	NP_775818	17	17q25.1	molecular function|zinc ion binding|IEA|GO:0008270|GOA|na//cellular component|intracellular|IEA|GO:0005622|GOA|na			Q6PJ69
64	cg15238200	2.00466	81615	36	2	71405229	NM_030923.2	TMEM163	Hs.369471	transmembrane protein 163	||TMEM163||SV31||DC29||Transmembrane protein 163||	NP_112185	2	2q21.3	molecular function|zinc ion binding|ISS|GO:0008270|GOA|na//cellular component|cell junction|IEA|GO:0030054|GOA|na//cellular component|early endosome membrane|ISS|GO:0031901|GOA|na//cellular component|integral component of synaptic vesicle membrane|ISS|GO:0030285|GOA|na//cellular component|synaptic vesicle membrane|IEA|GO:0030672|GOA|na	may bind zinc and other divalent cations and recruit them to vesicular organelles. {eco:0000250}.	cytoplasmic vesicle, secretory vesicle, synaptic vesicle membrane {eco:0000250}; multi-pass membrane protein {eco:0000250}. early endosome membrane {eco:0000250}. note=glutamatergic synaptic vesicles. {eco:0000250}.	Q8TC26
65	cg15297650	-1.58985	5076	36	10	135193526	NM_003987.2	PAX2	Hs.155644	paired box 2	||PAX2||PAPRS||FSGS7||Paired box 2||PAIRED BOX GENE 2||paired box homeotic gene 2||paired box protein Pax-2 isoform d||paired box protein Pax-2 isoform b||paired box protein Pax-2 isoform c||paired box protein Pax-2 isoform e||paired box protein Pax-2 isoform a||	NP_003981	10	10q24	molecular function|C2H2 zinc finger domain binding|IEA|GO:0070742|GOA|na//molecular function|DNA binding|IDA|GO:0003677|GOA|24676634//molecular function|DNA binding|ISS|GO:0003677|GOA|na//molecular function|RNA polymerase II core promoter proximal region sequence-specific DNA binding|IEA|GO:0000978|GOA|na//molecular function|RNA polymerase II core promoter proximal region sequence-specific DNA bi…	probable transcription factor that may have a role in kidney cell differentiation. has a critical role in the development of the urogenital tract, the eyes, and the cns.	nucleus.	Q02962
66	cg15416233	-2.47457	55800	36	11	102495256	NM_018400.2	SCN3B	Hs.4865	sodium channel, voltage-gated, type III, beta subunit	||HSA243396||ATFB16||SCNB3||BRGDA7||SCN3B||SODIUM CHANNEL, BETA-3 SUBUNIT||sodium channel subunit beta-3 precursor||voltage-gated sodium channel beta-3 subunit||sodium channel, voltage-gated, type III, beta subunit||	NP_060870	11	11q23.3	molecular function|ion channel binding|IPI|GO:0044325|GOA|20042427//molecular function|sodium channel regulator activity|IDA|GO:0017080|GOA|20226894//molecular function|sodium channel regulator activity|IMP|GO:0017080|GOA|20042427//molecular function|voltage-gated sodium channel activity|NAS|GO:0005248|GOA|10688874//molecular function|voltage-gated sodium channel activity involved in cardiac musc…	modulates channel gating kinetics. causes unique persistent sodium currents. inactivates the sodium channel opening more slowly than the subunit beta-1. its association with neurofascin may target the sodium channels to the nodes of ranvier of developing axons and retain these channels at the nodes in mature myelinated axons (by similarity). {eco:0000250}.	membrane; single-pass type i membrane protein.	Q9NY72
67	cg15457899	0.461285	26476	36	1	123030875	NM_012351.1	OR10J1	Hs.532661	olfactory receptor, family 10, subfamily J, member 1	||OR10J1||HSHGMP07J||olfactory receptor 10J1||olfactory receptor OR1-26||olfactory receptor-like protein HGMP07J||olfactory receptor, family 10, subfamily J, member 1||	NP_036483	1	1q23.2	molecular function|G-protein coupled receptor activity|IEA|GO:0004930|GOA|na//molecular function|olfactory receptor activity|IEA|GO:0004984|GOA|na//biological process|G-protein coupled receptor signaling pathway|IEA|GO:0007186|GOA|na//biological process|detection of chemical stimulus involved in sensory perception of smell|IEA|GO:0050911|GOA|na//biological process|sensory perception of chemical s…	odorant receptor. {eco:0000305}.	cell membrane; multi-pass membrane protein.	P30954
68	cg15700197	-0.378835	4314	36	11	157675831	NM_002422.3	MMP3	Hs.375129	matrix metallopeptidase 3 (stromelysin 1, progelatinase)	||SL-1||transin-1||MMP-3||STR1||proteoglycanase||SL1||MMP3||STMY1||CHDS6||3.4.24.17||STROMELYSIN I||matrix metalloproteinase-3||stromelysin-1 preproprotein||Matrix metallopeptidase 3 (stromelysin 1, progelatinase)||matrix metalloproteinase 3 (stromelysin 1, progelatinase)||	NP_002413	11	11q22.3	molecular function|calcium ion binding|IEA|GO:0005509|GOA|na//molecular function|endopeptidase activity|IDA|GO:0004175|GOA|15863497//molecular function|metalloendopeptidase activity|IEA|GO:0004222|GOA|na//molecular function|zinc ion binding|IEA|GO:0008270|GOA|na//biological process|cellular response to amino acid stimulus|IEA|GO:0071230|GOA|na//biological process|cellular response to nitric oxide…	can degrade fibronectin, laminin, gelatins of type i, iii, iv, and v; collagens iii, iv, x, and ix, and cartilage proteoglycans. activates procollagenase.	secreted, extracellular space, extracellular matrix {eco:0000305}.	P08254
69	cg16466334	-0.519673	49860	36	1	102219568	NM_016190.1	CRNN	Hs.242057	cornulin	||Cornulin||C1orf10||PDRC1||CRNN||SEP53||tumor-related protein||58 kDa heat shock protein||53 kDa putative calcium-binding protein||squamous epithelial heat shock protein 53||53 kDa squamous epithelial-induced stress protein||CHROMOSOME 1 OPEN READING FRAME 10||	NP_057274	1	1q21	molecular function|calcium ion binding|NAS|GO:0005509|GOA|11056050//biological process|response to heat|IDA|GO:0009408|GOA|11606197//biological process|single organismal cell-cell adhesion|IDA|GO:0016337|GOA|2631556//cellular component|cytoplasm|TAS|GO:0005737|GOA|14967811//cellular component|extracellular vesicular exosome|IDA|GO:0070062|GOA|19056867//cellular component|membrane|IDA|GO:0016020|G…	survival factor that participates in the clonogenicity of squamous esophageal epithelium cell lines, attenuates deoxycholic acid (dca)-induced apoptotic cell death and release of calcium. when overexpressed in oral squamous carcinom cell lines, regulates negatively cell proliferation by the induction of g1 arrest. {eco:0000269|pubmed:15896671, eco:0000269|pubmed:16640557}.	cytoplasm {eco:0000269|pubmed:15854041, eco:0000269|pubmed:16640557}. note=does not colocalize with tgm1.	Q9UBG3
70	cg16713808	2.14912	5593	36	4	150654664	NM_006259.1	PRKG2	Hs.232044	protein kinase, cGMP-dependent, type II		NP_006250	4	4q13.1-q21.1	molecular function|ATP binding|IEA|GO:0005524|GOA|na//molecular function|cGMP binding|IEA|GO:0030553|GOA|na//molecular function|cGMP-dependent protein kinase activity|IEA|GO:0004692|GOA|na//molecular function|protein homodimerization activity|IEA|GO:0042803|GOA|na//molecular function|protein kinase activity|TAS|GO:0004672|GOA|8607838//biological process|blood coagulation|TAS|GO:0007596|GOA|na//bi…		apical cell membrane {eco:0000269|pubmed:8636133}; lipid-anchor {eco:0000269|pubmed:8636133}.	Q13237|B7ZA25|B4DLF9
71	cg16744741	-0.62823	5618	36	5	82345049	NM_000949.2	PRLR	Hs.368587	prolactin receptor	||hPRLrI||MFAB||PRLR||hPRL receptor||Prolactin receptor||secreted prolactin binding protein||prolactin receptor isoform 5 precursor||prolactin receptor isoform 3 precursor||prolactin receptor isoform 2 precursor||prolactin receptor isoform 4 precursor||prolactin receptor isoform 1 precursor||prolactin receptor isoform 6 precursor||	NP_001191247	5	5p13.2	molecular function|metal ion binding|IEA|GO:0046872|GOA|na//molecular function|ornithine decarboxylase activator activity|NAS|GO:0042978|GOA|10585417//molecular function|peptide hormone binding|IPI|GO:0017046|GOA|7984244//molecular function|prolactin receptor activity|NAS|GO:0004925|GOA|10585417//molecular function|protein binding|IPI|GO:0005515|GOA|23048206//molecular function|protein homodimeri…	this is a receptor for the anterior pituitary hormone prolactin (prl). acts as a prosurvival factor for spermatozoa by inhibiting sperm capacitation through suppression of src kinase activation and stimulation of akt. isoform 4 is unable to transduce prolactin signaling. isoform 6 is unable to transduce prolactin signaling. {eco:0000269|pubmed:12580759, eco:0000269|pubmed:20032052}.	isoform 7: secreted.	P16471
72	cg17397493	0.501381	56983	36	3	35267029	NM_152305.1	POGLUT1	Hs.231750	protein O-glucosyltransferase 1	||KTELC1||MDSRP||hRumi||C3orf9||2.4.2.26||9630046K23Rik||MDS010||POGLUT1||hCLP46||KDELCL1||protein O-xylosyltransferase||x 010 protein||CAP10-LIKE PROTEIN, 46-KD||O-glucosyltransferase Rumi homolog||protein O-glucosyltransferase 1||RUMI, DROSOPHILA, HOMOLOG OF||KDELC family like 1||KTEL motif-containing protein 1||myelodysplastic syndromes relative protein||CAP10-like 46 kDa protein||KTEL (Lys-Ty…	NP_689518	3	3q13.33	molecular function|UDP-glucosyltransferase activity|IDA|GO:0035251|GOA|21081508//molecular function|glucosyltransferase activity|IDA|GO:0046527|GOA|21949356//molecular function|protein xylosyltransferase activity|IEA|GO:0030158|GOA|na//biological process|Notch signaling pathway|TAS|GO:0007219|GOA|na//biological process|cardiovascular system development|IEA|GO:0072358|GOA|na//biological process|pr…	dual specificity glycosyltransferase. catalyzes the transfer of glucose and xylose from udp-glucose and udp-xylose, respectively, to egf repeats, such as those found in f7, f9 and notch2, on the consensus sequence c-x-s-x-p-c. positively regulates notch signaling without affecting notch ligand binding. {eco:0000269|pubmed:21081508, eco:0000269|pubmed:21490058, eco:0000269|pubmed:21949356}.	endoplasmic reticulum lumen {eco:0000269|pubmed:16524674, eco:0000269|pubmed:24387993}.	Q8NBL1|B4DJ97
73	cg17421623	0.555595	9858	36	9	120670260	NM_014811.3	PPP1R26	Hs.533260	protein phosphatase 1, regulatory subunit 26	||PPP1R26||DRIM-INTERACTING PROTEIN||KIAA0649 GENE||DRIM/UTP20 interacting protein||1A6/DRIM (down-regulated in metastasis) interacting protein||protein phosphatase 1 regulatory subunit 26||Protein phosphatase 1, regulatory subunit 26||	NP_055626	9	9q34.3	molecular function|phosphatase binding|IDA|GO:0019902|GOA|19389623//molecular function|protein binding|IPI|GO:0005515|GOA|15231748//molecular function|protein phosphatase inhibitor activity|IEA|GO:0004864|GOA|na//biological process|negative regulation of phosphatase activity|IDA|GO:0010923|GOA|19389623//cellular component|nucleolus|IEA|GO:0005730|GOA|na//cellular component|nucleoplasm|IDA|GO:0005…	inhibits phosphatase activity of protein phosphatase 1 (pp1) complexes. may positively regulate cell proliferation. {eco:0000269|pubmed:16053918, eco:0000269|pubmed:19389623}.	nucleus, nucleolus {eco:0000269|pubmed:16053918}.	Q5T8A7
74	cg17536532	1.43785	57817	36	19	137510560	NM_021175.2	HAMP	Hs.8821	hepcidin antimicrobial peptide	||HAMP||LEAP1||PLTR||HFE2B||hepcidin preproprotein||Hepcidin antimicrobial peptide||putative liver tumor regressor||liver-expressed antimicrobial peptide 1||	NP_066998	19	19q13.1	molecular function|hormone activity|IEA|GO:0005179|GOA|na//biological process|cellular iron ion homeostasis|IEA|GO:0006879|GOA|na//biological process|defense response to bacterium|IEA|GO:0042742|GOA|na//biological process|defense response to fungus|IEA|GO:0050832|GOA|na//biological process|immune response|TAS|GO:0006955|GOA|11113131//biological process|killing of cells of other organism|IEA|GO:00…	has strong antimicrobial activity against e.coli ml35p n.cinerea and weaker against s.epidermidis, s.aureus and group b streptococcus bacteria. active against the fungus c.albicans. no activity against p.aeruginosa (pubmed:11113131, pubmed:11034317). {eco:0000269|pubmed:11034317, eco:0000269|pubmed:11113131}.	secreted.	P81172
75	cg17907567	0.722905	284486	36	1	40465314	NM_182578.1	THEM5	Hs.132648	thioesterase superfamily member 5	||ACOT15||THEM5||3.1.2.2||ACYL-CoA THIOESTERASE 15||acyl-CoA thioesterase THEM5||Thioesterase superfamily member 5||acyl-coenzyme A thioesterase 15||acyl-coenzyme A thioesterase THEM5||	NP_872384	1	1q21.3	molecular function|palmitoyl-CoA hydrolase activity|IDA|GO:0016290|GOA|22586271//biological process|cardiolipin acyl-chain remodeling|ISS|GO:0035965|GOA|na//biological process|fatty acid metabolic process|IEA|GO:0006631|GOA|na//biological process|long-chain fatty-acyl-CoA metabolic process|IDA|GO:0035336|GOA|22586271//cellular component|mitochondrial matrix|IDA|GO:0005759|GOA|22586271	has acyl-coa thioesterase activity towards long-chain (c16 and c18) fatty acyl-coa substrates, with a preference for linoleyl-coa and other unsaturated long-chain fatty acid-coa esters. plays an important role in mitochondrial fatty acid metabolism, and in remodeling of the mitochondrial lipid cardiolipin. required for normal mitochondrial function. {eco:0000269|pubmed:22586271}.	mitochondrion matrix {eco:0000269|pubmed:22586271}.	Q8N1Q8
76	cg18081104	0.414503	23526	36	19	150092747	NM_012292.2	HMHA1	Hs.465521	histocompatibility (minor) HA-1	||KIAA0223||HLA-HA1||ARHGAP45||HMHA1||histocompatibility (minor) HA-1||minor histocompatibility antigen HA-1||minor histocompatibility protein HA-1 isoform 4||minor histocompatibility protein HA-1 isoform 3||minor histocompatibility protein HA-1 isoform 1 precursor||minor histocompatibility protein HA-1 isoform 2 precursor||	NP_036424	19	19p13.3	molecular function|GTPase activator activity|IEA|GO:0005096|GOA|na//molecular function|metal ion binding|IEA|GO:0046872|GOA|na//biological process|positive regulation of GTPase activity|IEA|GO:0043547|GOA|na//biological process|regulation of small GTPase mediated signal transduction|TAS|GO:0051056|GOA|na//biological process|small GTPase mediated signal transduction|TAS|GO:0007264|GOA|na//cellular…	precursor of the histocompatibility antigen ha-1. more generally, minor histocompatibility antigens (mhags) refer to immunogenic peptide which, when complexed with mhc, can generate an immune response after recognition by specific t-cells. the peptides are derived from polymorphic intracellular proteins, which are cleaved by normal pathways of antigen processing. the binding of these peptides to …		Q92619|K7ES92|B3KXW7|B3KVA9|F5H1R4
77	cg18644543	0.931063	2314	36	17	1018356	NM_002018.2	FLII	Hs.513984	flightless I homolog (Drosophila)	||FLII||Fli1||FLIL||flightless I homolog (Drosophila)||protein flightless-1 homolog isoform 1||protein flightless-1 homolog isoform 2||protein flightless-1 homolog isoform 3||FLIGHTLESS I, DROSOPHILA, HOMOLOG OF||	NP_002009	17	17p11.2	molecular function|actin binding|IEA|GO:0003779|GOA|na//molecular function|protein binding|IPI|GO:0005515|GOA|10366446//biological process|multicellular organismal development|IEA|GO:0007275|GOA|na//biological process|muscle contraction|TAS|GO:0006936|GOA|9177775//biological process|regulation of transcription, DNA-templated|IEA|GO:0006355|GOA|na//biological process|transcription, DNA-templated|I…	may play a role as coactivator in transcriptional activation by hormone-activated nuclear receptors (nr) and acts in cooperation with ncoa2 and carm1. involved in estrogen hormone signaling. involved in early embryonic development (by similarity). may play a role in regulation of cytoskeletal rearrangements involved in cytokinesis and cell migration, by inhibiting rac1-dependent paxillin phosphor…	nucleus {eco:0000250}. cytoplasm, cytoskeleton {eco:0000250}. cytoplasm, cytoskeleton, microtubule organizing center, centrosome {eco:0000250}. cell junction, focal adhesion {eco:0000250}. note=colocalizes to actin-rich structures in blastocysts and, together with hras, rhoa and cdc42, in migrating fibroblasts. localizes to centrosomes (by similarity). {eco:0000250}.	Q13045
78	cg18804206	1.56121	3084	36	8	18103040	NM_004495.1	NRG1	Hs.453951	neuregulin 1	||MSTP131||NRG1||HRG1||HRGA||pro-NRG1||MST131||NRG1-IT2||HGL||Neuregulin 1||neu differentiation factor||pro-neuregulin-1, membrane-bound isoform isoform ndf43c||pro-neuregulin-1, membrane-bound isoform isoform HRG-beta1c||pro-neuregulin-1, membrane-bound isoform isoform HRG-gamma2||pro-neuregulin-1, membrane-bound isoform isoform ndf43b||pro-neuregulin-1, membrane-bound isoform isoform HRG-beta1d…	NP_039258	8	8p12	molecular function|ErbB-2 class receptor binding|IEA|GO:0005176|GOA|na//molecular function|ErbB-3 class receptor binding|IDA|GO:0043125|GOA|7556068//molecular function|ErbB-3 class receptor binding|IPI|GO:0043125|GOA|11389077//molecular function|cytokine activity|TAS|GO:0005125|GOA|10372964//molecular function|growth factor activity|IDA|GO:0008083|GOA|11389077//molecular function|growth factor ac…	direct ligand for erbb3 and erbb4 tyrosine kinase receptors. concomitantly recruits erbb1 and erbb2 coreceptors, resulting in ligand-stimulated tyrosine phosphorylation and activation of the erbb receptors. the multiple isoforms perform diverse functions such as inducing growth and differentiation of epithelial, glial, neuronal, and skeletal muscle cells; inducing expression of acetylcholine rece…	isoform 10: membrane; single-pass type i membrane protein. note=may possess an internal uncleaved signal sequence.	Q02297|Q7RTW5|Q7RTW3|A6MW56|B7Z1D7|A6MW55|B0FYA9|B0FWZ3|B0FYA8|Q6PK61|B0FYA7
79	cg19162158	3.2048	65061	36	2	32405427	NM_139158.1	CDK15	Hs.348711	cyclin-dependent kinase 15	||CDK15||PFTAIRE2||2.7.11.22||PFTK2||serine/threonine-protein kinase PFTAIRE-2||serine/threonine protein kinase||Cyclin-dependent kinase 15||serine/threonine-protein kinase ALS2CR7||PFTAIRE protein kinase 2||cyclin-dependent kinase 15 isoform 2||cell division protein kinase 15||cyclin-dependent kinase 15 isoform 1||cyclin-dependent kinase 15 isoform 3||amyotrophic lateral sclerosis 2 (juvenile) c…	NP_631897	2	2q33.2	molecular function|ATP binding|IEA|GO:0005524|GOA|na//molecular function|cyclin-dependent protein serine/threonine kinase activity|IEA|GO:0004693|GOA|na//molecular function|metal ion binding|IEA|GO:0046872|GOA|na//molecular function|protein binding|IPI|GO:0005515|GOA|22939624//biological process|protein phosphorylation|IEA|GO:0006468|GOA|na//biological process|regulation of cell cycle|IEA|GO:0051…	serine/threonine-protein kinase involved in the control of the eukaryotic cell cycle, whose activity is controlled by an associated cyclin. {eco:0000250}.		Q96Q40
80	cg19654437	-0.721913	10526	36	12	202379403	NM_006390.2	IPO8	Hs.505136	importin 8	||RANBP8||IPO8||imp8||Importin 8||ran-binding protein 8||importin-8 isoform 2||importin-8 isoform 1||RAN binding protein 8||	NP_006381	12	12p11.21	molecular function|Ran GTPase binding|IEA|GO:0008536|GOA|na//molecular function|protein binding|IPI|GO:0005515|GOA|17932509//biological process|intracellular protein transport|IEA|GO:0006886|GOA|na//biological process|signal transduction|TAS|GO:0007165|GOA|9214382//cellular component|cytoplasm|IEA|GO:0005737|GOA|na//cellular component|nucleus|IEA|GO:0005634|GOA|na	seems to function in nuclear protein import, either by acting as autonomous nuclear transport receptor or as an adapter- like protein in association with the importin-beta subunit kpnb1. acting autonomously, is thought to serve itself as receptor for nuclear localization signals (nls) and to promote translocation of import substrates through the nuclear pore complex (npc) by an energy requiring, …	cytoplasm {eco:0000250}. nucleus {eco:0000250}.	O15397
81	cg19722847	-1.32817	1453	36	17	30740381	NM_001893.3	CSNK1D	Hs.631725	casein kinase 1, delta	||HCKID||FASPS2||CSNK1D||CKIdelta||CKI-delta||2.7.11.26||2.7.11.1||tau-protein kinase CSNK1D||Casein kinase 1, delta||CASEIN KINASE I, DELTA||casein kinase I isoform delta isoform 2||casein kinase I isoform delta isoform 1||	NP_620693	17	17q25	molecular function|ATP binding|IEA|GO:0005524|GOA|na//molecular function|glycoprotein binding|IEA|GO:0001948|GOA|na//molecular function|peptide binding|IEA|GO:0042277|GOA|na//molecular function|phosphoprotein binding|IEA|GO:0051219|GOA|na//molecular function|protein binding|IPI|GO:0005515|GOA|16618118//molecular function|protein kinase activity|IDA|GO:0004672|GOA|16618118//molecular function|prot…	essential serine/threonine-protein kinase that regulates diverse cellular growth and survival processes including wnt signaling, dna repair and circadian rhythms. it can phosphorylate a large number of proteins. casein kinases are operationally defined by their preferential utilization of acidic proteins such as caseins as substrates. phosphorylates connexin-43/gja1, map1a, snapin, mapt/tau, top2…	cytoplasm. nucleus. cytoplasm, cytoskeleton, microtubule organizing center, centrosome. cytoplasm, perinuclear region. cell membrane. cytoplasm, cytoskeleton, spindle. golgi apparatus. note=localized at mitotic spindle microtubules, and at the centrosomes and interphase in interphase cells. recruited to the spindle apparatus and the centrosomes in response to dna- damage. correct subcellular loca…	P48730|H7BYT1
82	cg19761273	-1.79286	58	36	1	77825385	NM_001100.3	ACTA1	Hs.1288	actin, alpha 1, skeletal muscle	||NEM2||NEM3||NEM1||CFTDM||ACTA1||MPFD||ASMA||CFTD1||actin, alpha skeletal muscle||nemaline myopathy type 3||Actin, alpha 1, skeletal muscle||ACTIN, ALPHA, SKELETAL MUSCLE 1||	NP_001091	1	1q42.13	molecular function|ADP binding|TAS|GO:0043531|GOA|10508519//molecular function|ATP binding|TAS|GO:0005524|GOA|10508519//molecular function|myosin binding|TAS|GO:0017022|GOA|10508519//molecular function|protein binding|IPI|GO:0005515|GOA|12849983//molecular function|structural constituent of cytoskeleton|TAS|GO:0005200|GOA|10508519//biological process|cell growth|IEA|GO:0016049|GOA|na//biological …	actins are highly conserved proteins that are involved in various types of cell motility and are ubiquitously expressed in all eukaryotic cells.	cytoplasm, cytoskeleton.	P68133
83	cg20025656	1.88324	57626	36	13	227636853	NM_020866.1	KLHL1	Hs.508201	kelch-like family member 1	||KLHL1||MRP2||KELCH-LIKE 1||Mayven-related protein 2||Kelch-like family member 1||kelch-like protein 1 isoform 2||kelch-like protein 1 isoform 1||	NP_065917	13	13q21	molecular function|actin binding|NAS|GO:0003779|GOA|10888605//biological process|actin cytoskeleton organization|NAS|GO:0030036|GOA|10888605//biological process|adult walking behavior|IEA|GO:0007628|GOA|na//biological process|cerebellar Purkinje cell layer development|IEA|GO:0021680|GOA|na//biological process|dendrite development|IEA|GO:0016358|GOA|na//cellular component|cytoplasm|IDA|GO:0005737|…	may play a role in organizing the actin cytoskeleton of the brain cells.	cytoplasm, cytoskeleton.	Q9NR64|Q8TBJ7|B7Z3I8
84	cg20349377	-1.09914	9404	36	11	69581128	NM_004811.1	LPXN	Hs.125474	leupaxin	||LPXN||LDPL||Leupaxin||leupaxin isoform 2||leupaxin isoform 1||	NP_004802	11	11q12.1	molecular function|protein binding|IPI|GO:0005515|GOA|17640867//molecular function|transcription cofactor activity|IDA|GO:0003712|GOA|18451096//molecular function|zinc ion binding|IEA|GO:0008270|GOA|na//biological process|cell adhesion|IEA|GO:0007155|GOA|na//biological process|negative regulation of B cell receptor signaling pathway|IDA|GO:0050859|GOA|17640867//biological process|negative regulat…	transcriptional coactivator for androgen receptor (ar) and serum response factor (srf). contributes to the regulation of cell adhesion, spreading and cell migration and acts as a negative regulator in integrin-mediated cell adhesion events. suppresses the integrin-induced tyrosine phosphorylation of paxillin (pxn). may play a critical role as an adapter protein in the formation of the adhesion zo…	cytoplasm. cell junction, focal adhesion. nucleus. cytoplasm, perinuclear region {eco:0000250}. cell projection, podosome. cell membrane. note=shuttles between the cytoplasm and nucleus. recruited to the cell membrane following b- cell antigen receptor (bcr) cross-linking in b-cells. enhanced focal adhesion kinase activity (ptk2/fak) attenuates its nuclear accumulation and limits its ability to e…	O60711
85	cg20654468	0.335556	4681	36	1	58099573	NM_005380.3	NBL1	Hs.654502	neuroblastoma 1, DAN family BMP antagonist	||NO3||D1S1733E||NBL1||N03||DAND1||DAN domain family member 1||neuroblastoma 1, DAN family BMP antagonist||differential screening-selected gene aberrant in neuroblastoma||neuroblastoma suppressor of tumorigenicity 1 isoform 1||neuroblastoma candidate region, suppression of tumorigenicity 1||neuroblastoma suppressor of tumorigenicity 1 isoform 3||neuroblastoma suppressor of tumorigenicity 1 isofor…	NP_877421	1	1p36.13	molecular function|BMP binding|ISS|GO:0036122|GOA|na//molecular function|morphogen activity|ISS|GO:0016015|GOA|na//molecular function|protein homodimerization activity|IMP|GO:0042803|GOA|23063586//biological process|determination of dorsal identity|ISS|GO:0048263|GOA|na//biological process|negative regulation of BMP signaling pathway|IDA|GO:0030514|GOA|23063586//biological process|negative regula…	possible candidate as a tumor suppressor gene of neuroblastoma. may play an important role in preventing cells from entering the final stage (g1/s) of the transformation process.	secreted.	P41271
86	cg21057046	-1.74617	79581	36	8	19842791	NM_024531.3	SLC52A2	Hs.6459	solute carrier family 52 (riboflavin transporter), member 2	||RFVT2||BVVLS2||SLC52A2||GPR172A||PAR1||hRFT3||FLJ11856||D15Ertd747e||riboflavin transporter 3||PERV-A receptor 1||G PROTEIN-COUPLED RECEPTOR 41||G protein-coupled receptor 172A||putative G-protein coupled receptor GPCR41||porcine endogenous retrovirus A receptor 1||PORCINE ENDOGENOUS RETROVIRUS, SUBGROUP A, RECEPTOR 1||solute carrier family 52 (riboflavin transporter), member 2||Solute carrier …	NP_078807	8	8q24.3	molecular function|riboflavin transporter activity|IDA|GO:0032217|GOA|20463145//molecular function|virus receptor activity|IEA|GO:0001618|GOA|na//biological process|response to virus|IEA|GO:0009615|GOA|na//biological process|riboflavin transport|IDA|GO:0032218|GOA|20463145//cellular component|integral component of plasma membrane|IDA|GO:0005887|GOA|20463145	riboflavin transporter. riboflavin transport is na(+)- independent but moderately ph-sensitive. activity is strongly inhibited by riboflavin analogs, such as lumiflavin. weakly inhibited by flavin adenine dinucleotide (fad) and flavin mononucleotide (fmn). in case of infection by retroviruses, acts as a cell receptor to retroviral envelopes similar to the porcine endogenous retrovirus (perv-a). {…	cell membrane {eco:0000269|pubmed:20463145}; multi-pass membrane protein {eco:0000269|pubmed:20463145}.	Q9HAB3
87	cg21959619	-0.108227	23037	36	5	145551814	NM_178140.1	PDZD2	Hs.481819	PDZ domain containing 2	||PIN1||PDZD2||KIAA0300||PAPIN||AIPC||PDZK3||PDZ DOMAIN-CONTAINING 2||PDZ domain containing 2||PDZ domain-containing protein 3||PDZ domain-containing protein 2||activated in prostate cancer protein||PLAKOPHILIN-RELATED ARMADILLO REPEAT PROTEIN-INTERACTING PDZ PROTEIN||	NP_835260	5	5p13.3	biological process|cell adhesion|IEA|GO:0007155|GOA|na//cellular component|cell-cell junction|ISS|GO:0005911|GOA|12671685//cellular component|cytoplasm|IDA|GO:0005737|GOA|11289102//cellular component|endoplasmic reticulum|ISS|GO:0005783|GOA|12671685//cellular component|extracellular region|ISS|GO:0005576|GOA|12671685//cellular component|nucleus|ISS|GO:0005634|GOA|12671685		processed pdz domain-containing protein 2: secreted {eco:0000250}.	O15018
88	cg22705225	-1.212	6677	36	7	31675973	NM_003117.3	SPAM1	Hs.121494	sperm adhesion molecule 1 (PH-20 hyaluronidase, zona pellucida binding)	||HYAL3||HEL-S-96n||hyal-PH20||SPAG15||SPAM1||HYA1||HYAL5||HYAL1||3.2.1.35||hyaluronoglucosaminidase PH-20||sperm surface protein PH-20||hyaluronidase PH-20 isoform 1||hyaluronidase PH-20 isoform 2||epididymis secretory sperm binding protein Li 96n||sperm adhesion molecule 1 (PH-20 hyaluronidase, zona pellucida binding)||	NP_694859	7	7q31.3	molecular function|hyalurononglucosaminidase activity|IEA|GO:0004415|GOA|na//biological process|binding of sperm to zona pellucida|TAS|GO:0007339|GOA|8195297//biological process|carbohydrate metabolic process|IEA|GO:0005975|GOA|na//biological process|cell adhesion|IEA|GO:0007155|GOA|na//biological process|fusion of sperm to egg plasma membrane|IEA|GO:0007342|GOA|na//biological process|multicellul…	involved in sperm-egg adhesion. upon fertilization sperm must first penetrate a layer of cumulus cells that surrounds the egg before reaching the zona pellucida. the cumulus cells are embedded in a matrix containing hyaluronic acid which is formed prior to ovulation. this protein aids in penetrating the layer of cumulus cells by digesting hyaluronic acid. {eco:0000269|pubmed:8282124}.	cell membrane; lipid-anchor, gpi-anchor.	P38567|Q5D1J4
89	cg22724153	-0.712185	138151	36	9	123353161	NM_144653.3	NACC2	Hs.112895	NACC family member 2, BEN and BTB (POZ) domain containing	||BTBD31||BEND9||NACC2||RBB||NAC-2||BTBD14A||BTB/POZ domain-containing protein 14A||nucleus accumbens-associated protein 2||BEN domain containing 9||BTB (POZ) domain containing 14A||repressor with BTB domain and BEN domain||NACC FAMILY, MEMBER 2, BEN AND BTB/POZ DOMAINS-CONTAINING||transcription repressor with a BTB domain and a BEN domain||NACC family member 2, BEN and BTB (POZ) domain containin…	NP_653254	9	9q34.3	molecular function|RNA polymerase II core promoter proximal region sequence-specific DNA binding|IDA|GO:0000978|GOA|22926524//molecular function|RNA polymerase II core promoter proximal region sequence-specific DNA binding transcription factor activity involved in negative regulation of transcription|IDA|GO:0001078|GOA|22926524//molecular function|RNA polymerase II transcription factor binding tr…	functions as a transcriptional repressor through its association with the nurd complex. recruits the nurd complex to the promoter of mdm2, leading to the repression of mdm2 transcription and subsequent stability of p53/tp53. {eco:0000269|pubmed:22926524}.	nucleus {eco:0000269|pubmed:22926524}. note=predominantly associated with chromatin.	Q96BF6
90	cg22747092	-0.155438	166012	36	3	138127639	NM_152889.1	CHST13	Hs.292375	carbohydrate (chondroitin 4) sulfotransferase 13	||C4ST3||C4ST-3||CHST13||2.8.2.5||chondroitin 4-O-sulfotransferase 3||chondroitin 4-sulfotransferase 3||carbohydrate sulfotransferase 13 precursor||Carbohydrate (chondroitin 4) sulfotransferase 13||	NP_690849	3	3q21.3	molecular function|N-acetylgalactosamine 4-O-sulfotransferase activity|IDA|GO:0001537|GOA|12080076//molecular function|chondroitin 4-sulfotransferase activity|IDA|GO:0047756|GOA|12080076//biological process|carbohydrate biosynthetic process|IEA|GO:0016051|GOA|na//biological process|carbohydrate metabolic process|TAS|GO:0005975|GOA|na//biological process|chondroitin sulfate biosynthetic process|ID…	catalyzes the transfer of sulfate to position 4 of the n-acetylgalactosamine (galnac) residue of chondroitin. chondroitin sulfate constitutes the predominant proteoglycan present in cartilage and is distributed on the surfaces of many cells and extracellular matrices. transfers sulfate to the c4 hydroxyl of beta1,4-linked galnac that is substituted with a beta-linked glucuronic acid at the c-3 hy…	golgi apparatus membrane {eco:0000250}; single-pass type ii membrane protein {eco:0000250}.	Q8NET6
91	cg22884082	0.628323	51161	36	3	88095742	NM_016210.2	C3orf18	Hs.517860	chromosome 3 open reading frame 18	||C3orf18||G20||uncharacterized protein C3orf18 isoform 1||uncharacterized protein C3orf18 isoform 2||Chromosome 3 open reading frame 18||	NP_057294	3	3p21.3	cellular component|integral component of membrane|IEA|GO:0016021|GOA|na		membrane {eco:0000305}; single-pass membrane protein {eco:0000305}.	Q9UK00
92	cg22919728	-0.2923	9227	36	4	127725180	NM_004744.3	LRAT	Hs.658427	lecithin retinol acyltransferase (phosphatidylcholine--retinol O-acyltransferase)	||2.3.1.135||LCA14||LRAT||lecithin retinol acyltransferase precursor||lecithin retinol acyltransferase (phosphatidylcholine--retinol O-acyltransferase)||	NP_004735	4	4q32.1	molecular function|phosphatidylcholine-retinol O-acyltransferase activity|IEA|GO:0047173|GOA|na//molecular function|retinoic acid binding|IEA|GO:0001972|GOA|na//molecular function|retinol binding|IEA|GO:0019841|GOA|na//molecular function|transferase activity, transferring acyl groups|TAS|GO:0016746|GOA|9920938//biological process|phototransduction, visible light|TAS|GO:0007603|GOA|na//biological …	transfers the acyl group from the sn-1 position of phosphatidylcholine to all-trans retinol, producing all-trans retinyl esters. retinyl esters are storage forms of vitamin a. lrat plays a critical role in vision. it provides the all-trans retinyl ester substrates for the isomerohydrolase which processes the esters into 11-cis-retinol in the retinal pigment epithelium; due to a membrane-associate…	endoplasmic reticulum membrane {eco:0000250}; single-pass membrane protein {eco:0000250}. rough endoplasmic reticulum {eco:0000250}. endosome, multivesicular body {eco:0000250}. cytoplasm, perinuclear region {eco:0000250}. note=present in the rough endoplasmic reticulum and multivesicular body in hepatic stellate cells. present in the rough endoplasmic reticulum and perinuclear region in endothel…	O95237
93	cg23320649	-0.872134	84254	36	17	50579617	NM_032294.2	CAMKK1	null	null	null	null	null	null	null	null	null	null
94	cg23587449	-5.21448	140775	36	17	155883139	NM_144775.1	SMCR8	Hs.592944	Smith-Magenis syndrome chromosome region, candidate 8	||SMCR8||Smith-Magenis syndrome chromosome region, candidate 8||Smith-Magenis syndrome chromosomal region candidate gene 8 protein||	NP_658988	17	17p11.2	cellular component|nucleoplasm|IDA|GO:0005654|GOA|na			Q8TEV9
95	cg23668631	-0.545801	6755	36	16	3743685	NM_001053.1	SSTR5	Hs.449840	somatostatin receptor 5	||SSTR5||SS-5-R||Somatostatin receptor 5||somatostatin receptor subtype 5||somatostatin receptor type 5||	NP_001166031	16	16p13.3	molecular function|neuropeptide binding|IBA|GO:0042923|GOA|na//molecular function|somatostatin receptor activity|IEA|GO:0004994|GOA|na//biological process|G-protein coupled receptor signaling pathway|TAS|GO:0007186|GOA|9892014//biological process|G-protein coupled receptor signaling pathway, coupled to cyclic nucleotide second messenger|TAS|GO:0007187|GOA|7908405//biological process|cellular resp…	receptor for somatostatin 28 and to a lesser extent for somatostatin-14. the activity of this receptor is mediated by g proteins which inhibit adenylyl cyclase. increases cell growth inhibition activity of sstr2 following heterodimerization. {eco:0000269|pubmed:12072395, eco:0000269|pubmed:7908405, eco:0000269|pubmed:8078491, eco:0000269|pubmed:8373420}.	cell membrane; multi-pass membrane protein.	P35346
96	cg24001070	1.27346	966	36	11	18158367	NM_203331.1	CD59	Hs.278573	CD59 molecule, complement regulatory protein	||MIN3||MSK21||MAC-IP||MIRL||protectin||MIN1||MACIF||HRF-20||CD59||MIN2||HRF20||1F5 antigen||Ly-6-like protein||MEM43 antigen||lymphocytic antigen CD59/MEM43||CD59 glycoprotein preproprotein||T cell-activating protein||human leukocyte antigen MIC11||membrane attack complex inhibition factor||20 kDa homologous restriction factor||CD59 molecule, complement regulatory protein||membrane inhibitor of …	NP_976076	11	11p13	molecular function|complement binding|IBA|GO:0001848|GOA|na//molecular function|protein binding|IPI|GO:0005515|GOA|20427317//biological process|blood coagulation|TAS|GO:0007596|GOA|1381503//biological process|cell activation|IBA|GO:0001775|GOA|na//biological process|cell surface receptor signaling pathway|TAS|GO:0007166|GOA|7691713//biological process|innate immune response|TAS|GO:0045087|GOA|na/…	the soluble form from urine retains its specific complement binding activity, but exhibits greatly reduced ability to inhibit mac assembly on cell membranes.	cell membrane; lipid-anchor, gpi-anchor. secreted. note=soluble form found in a number of tissues.	P13987|Q6FHM9
97	cg24433189	0.47503	9933	36	9	1068690	NM_014878.3	KIAA0020	Hs.493309	KIAA0020	||PUF6||hPUF-A||HLA-HA8||KIAA0020||XTP5||KIAA0020 GENE||penguin homolog||minor histocompatibility antigen HA-8||HBV XAg-transactivated protein 5||pumilio domain-containing protein KIAA0020||HBV X-transactivated gene 5 protein||protein 5 transactivated by hepatitis B virus X antigen (HBxAg)||	NP_055693	9	9p24.2	molecular function|mRNA binding|IBA|GO:0003729|GOA|na//molecular function|poly(A) RNA binding|IDA|GO:0044822|GOA|22658674//biological process|regulation of translation|IBA|GO:0006417|GOA|na//cellular component|endoplasmic reticulum|IDA|GO:0005783|GOA|10942595//cellular component|nucleolus|IDA|GO:0005730|GOA|na		nucleus, nucleolus {eco:0000269|pubmed:12429849, eco:0000269|ref.6}.	Q15397
98	cg24453664	1.33558	81550	36	13	33714989	NM_030794.1	TDRD3	Hs.525061	tudor domain containing 3	||TDRD3||Tudor domain containing 3||tudor domain-containing protein 3 isoform 1||tudor domain-containing protein 3 isoform 2||	NP_110421	13	13q21.2	molecular function|chromatin binding|IDA|GO:0003682|GOA|21172665//molecular function|methylated histone binding|IDA|GO:0035064|GOA|21172665//molecular function|poly(A) RNA binding|IDA|GO:0044822|GOA|22658674//molecular function|transcription coactivator activity|IDA|GO:0003713|GOA|21172665//biological process|chromatin modification|IEA|GO:0016568|GOA|na//biological process|regulation of nucleic a…	scaffolding protein that specifically recognizes and binds dimethylarginine-containing proteins. in nucleus, acts as a coactivator: recognizes and binds asymmetric dimethylation on the core histone tails associated with transcriptional activation (h3r17me2a and h4r3me2a) and recruits proteins at these arginine- methylated loci. in cytoplasm, may play a role in the assembly and/or disassembly of m…	cytoplasm. nucleus. note=predominantly cytoplasmic. associated with actively translating polyribosomes and with mrna stress granules.	Q9H7E2
99	cg24471894	-0.51991	8190	36	19	2828508	NM_006533.1	MIA	Hs.646364	melanoma inhibitory activity	||CD-RAP||CDRAP||MIA||Melanoma inhibitory activity||MELANOMA INHIBITORY ACTIVITY PROTEIN||CARTILAGE-DERIVED RETINOIC ACID-SENSITIVE PROTEIN||melanoma-derived growth regulatory protein precursor||	NP_006524	19	19q13.2	molecular function|growth factor activity|IEA|GO:0008083|GOA|na//biological process|cell proliferation|TAS|GO:0008283|GOA|7923218//cellular component|extracellular space|TAS|GO:0005615|GOA|7923218	elicits growth inhibition on melanoma cells in vitro as well as some other neuroectodermal tumors, including gliomas.	secreted.	Q16674
100	cg24949049	0.751917	9252	36	14	59911242	NM_004755.2	RPS6KA5	Hs.510225	ribosomal protein S6 kinase, 90kDa, polypeptide 5	||RLPK||S6K-alpha-5||2.7.11.1||MSPK1||RSKL||MSK1||RPS6KA5||RSK-like protein kinase||RIBOSOMAL PROTEIN S6 KINASE, 90-KD, 5||nuclear mitogen- and stress-activated protein kinase 1||90 kDa ribosomal protein S6 kinase 5||ribosomal protein S6 kinase alpha-5 isoform b||ribosomal protein S6 kinase, 90kDa, polypeptide 5||ribosomal protein S6 kinase alpha-5 isoform a||	NP_872198	14	14q31-q32.1	molecular function|ATP binding|IDA|GO:0005524|GOA|9687510//molecular function|magnesium ion binding|IEA|GO:0000287|GOA|na//molecular function|protein binding|IPI|GO:0005515|GOA|12628924//molecular function|protein kinase activity|IDA|GO:0004672|GOA|9873047//molecular function|protein serine/threonine kinase activity|IDA|GO:0004674|GOA|9687510//molecular function|protein serine/threonine kinase ac…	serine/threonine-protein kinase that is required for the mitogen or stress-induced phosphorylation of the transcription factors creb1 and atf1 and for the regulation of the transcription factors rela, stat3 and etv1/er81, and that contributes to gene activation by histone phosphorylation and functions in the regulation of inflammatory genes. phosphorylates creb1 and atf1 in response to mitogenic …	nucleus. cytoplasm. note=predominantly nuclear. exported into cytoplasm in response to glucocorticoid.	O75582|Q9UG98
101	cg25152942	0.511763	401459	36	8	45972920	NM_207504.1	null	null	null	null	null	null	null	null	null	null	null
102	cg25398949	3.47532	81551	36	8	91527472	NM_030795.2	STMN4	Hs.201058	stathmin-like 4	||STMN4||stathmin-like-protein RB3||Stathmin-like 4||stathmin-4 isoform 1||stathmin-4 isoform 2||stathmin-4 isoform 4||stathmin-like protein B3||stathmin-4 isoform 3||	NP_110422	8	8p21.2	biological process|regulation of microtubule polymerization or depolymerization|IEA|GO:0031110|GOA|na//cellular component|Golgi apparatus|IEA|GO:0005794|GOA|na//cellular component|axon|IEA|GO:0030424|GOA|na//cellular component|growth cone|IEA|GO:0030426|GOA|na	exhibits microtubule-destabilizing activity. {eco:0000250}.	golgi apparatus {eco:0000250}. cell projection, growth cone {eco:0000250}. cell projection, axon {eco:0000250}.	E7EVN3|Q9H169
103	cg25538571	-0.430582	3674	36	17	49502710	NM_000419.2	ITGA2B	Hs.411312	integrin, alpha 2b (platelet glycoprotein IIb of IIb/IIIa complex, antigen CD41)	||GP2B||BDPLT16||BDPLT2||GTA||ITGA2B||HPA3||GPIIb||PPP1R93||GP IIb||GPalpha IIb||INTEGRIN, ALPHA-2B||integrin alpha-IIb preproprotein||platelet membrane glycoprotein IIb||CD41B PLATELET-SPECIFIC ANTIGEN BAK||platelet fibrinogen receptor, alpha subunit||protein phosphatase 1, regulatory subunit 93||integrin, alpha 2b (platelet glycoprotein IIb of IIb/IIIa complex, antigen CD41)||	NP_000410	17	17q21.32	molecular function|extracellular matrix binding|IEA|GO:0050840|GOA|na//molecular function|fibrinogen binding|IEA|GO:0070051|GOA|na//molecular function|identical protein binding|IPI|GO:0042802|GOA|11606749//molecular function|metal ion binding|IEA|GO:0046872|GOA|na//molecular function|protein binding|IPI|GO:0005515|GOA|14681217//biological process|axon guidance|TAS|GO:0007411|GOA|na//biological pr…	integrin alpha-iib/beta-3 is a receptor for fibronectin, fibrinogen, plasminogen, prothrombin, thrombospondin and vitronectin. it recognizes the sequence r-g-d in a wide array of ligands. it recognizes the sequence h-h-l-g-g-g-a-k-q-a-g-d-v in fibrinogen gamma chain. following activation integrin alpha- iib/beta-3 brings about platelet/platelet interaction through binding of soluble fibrinogen. t…	membrane; single-pass type i membrane protein.	P08514
104	cg25762706	1.55582	4914	36	1	27171784	NM_001007792.1	NTRK1	Hs.406293	neurotrophic tyrosine kinase, receptor, type 1	||Trk-A||NTRK1||MTC||2.7.10.1||p140-TrkA||gp140trk||Oncogene TRK||NTRK1/TPM3 FUSION GENE||TRKA TRK ONCOGENE||NTRK1/TFG FUSION GENE||tropomyosin-related kinase A||tyrosine kinase receptor A||TRK1-transforming tyrosine kinase protein||Neurotrophic tyrosine kinase, receptor, type 1||high affinity nerve growth factor receptor isoform 3||high affinity nerve growth factor receptor isoform 1 precursor||…	NP_002520	1	1q21-q22	molecular function|ATP binding|IEA|GO:0005524|GOA|na//molecular function|ephrin receptor binding|IEA|GO:0046875|GOA|na//molecular function|nerve growth factor binding|IDA|GO:0048406|GOA|15488758//molecular function|nerve growth factor binding|IDA|GO:0048406|GOA|15488758//molecular function|nerve growth factor receptor activity|IDA|GO:0010465|GOA|15488758//molecular function|neurotrophin binding|T…	isoform trka-iii is resistant to ngf, constitutively activates akt1 and nf-kappa-b and is unable to activate the ras- mapk signaling cascade. antagonizes the anti-proliferative ngf- ntrk1 signaling that promotes neuronal precursors differentiation. isoform trka-iii promotes angiogenesis and has oncogenic activity when overexpressed.	cell membrane {eco:0000269|pubmed:15488758}; single-pass type i membrane protein {eco:0000269|pubmed:15488758}. early endosome membrane {eco:0000250}; single-pass type i membrane protein {eco:0000250}. late endosome membrane {eco:0000250}; single-pass type i membrane protein {eco:0000250}. note=internalized to endosomes upon binding of ngf or ntf3 and further transported to the cell body via a re…	P04629|X5DR71
105	cg25809905	-1.73118	3458	36	12	39823254	NM_000619.2	IFNG	Hs.856	interferon, gamma	||IFNG||IFN-gamma||IFI||IFG||immune interferon||Interferon, gamma||IFN, IMMUNE||interferon gamma precursor||	NP_000610	12	12q14	molecular function|cytokine activity|IBA|GO:0005125|GOA|na//molecular function|interferon-gamma receptor binding|IEA|GO:0005133|GOA|na//biological process|CD8-positive, alpha-beta T cell differentiation involved in immune response|IEA|GO:0002302|GOA|na//biological process|adaptive immune response|IBA|GO:0002250|GOA|na//biological process|antigen processing and presentation|IEA|GO:0019882|GOA|na//…	produced by lymphocytes activated by specific antigens or mitogens. ifn-gamma, in addition to having antiviral activity, has important immunoregulatory functions. it is a potent activator of macrophages, it has antiproliferative effects on transformed cells and it can potentiate the antiviral and antitumor effects of the type i interferons.	secreted.	P01579
106	cg25827666	-1.92033	4994	36	17	155052182	NM_002550.1	OR3A1	Hs.647410	olfactory receptor, family 3, subfamily A, member 1	||OR17-82||OR40||OLFRA03||OR3A1||OR17-40||olfactory receptor 17-40||olfactory receptor OR17-15||olfactory receptor 3A1||olfactory receptor, family 3, subfamily A, member 1||	NP_002541	17	17p13.3	molecular function|G-protein coupled receptor activity|IEA|GO:0004930|GOA|na//molecular function|olfactory receptor activity|IBA|GO:0004984|GOA|na//biological process|G-protein coupled receptor signaling pathway|IBA|GO:0007186|GOA|na//biological process|detection of chemical stimulus involved in sensory perception of smell|IBA|GO:0050911|GOA|na//biological process|signal transduction|NAS|GO:00071…	odorant receptor. {eco:0000305}.	cell membrane; multi-pass membrane protein.	P47881
107	cg26227465	0.344412	117157	36	1	66839844	NM_053282.4	SH2D1B	Hs.350581	SH2 domain containing 1B	||EAT-2||SH2D1B||EWS/FLI1-activated transcript 2||SH2 DOMAIN-CONTAINING 1B||SH2 domain containing 1B||SH2 domain-containing protein 1B||SH2 domain-containing molecule EAT2||	NP_444512	1	1q23.3	molecular function|protein binding|IPI|GO:0005515|GOA|12928397//molecular function|protein binding, bridging|TAS|GO:0030674|GOA|16425036//biological process|leukocyte activation involved in immune response|ISS|GO:0002366|GOA|na//biological process|negative regulation of natural killer cell mediated cytotoxicity|IEA|GO:0045953|GOA|na//biological process|peptidyl-tyrosine phosphorylation|IEA|GO:001…	plays a role in controlling signal transduction through at least four receptors, cd84, slamf1, ly9 and cd244, expressed on the surface of professional antigen-presenting cells.		O14796
108	cg26232558	0.386261	79712	36	2	3142558	NM_024659.2	GTDC1	Hs.44780	glycosyltransferase-like domain containing 1	||Hmat-Xa||GTDC1||mannosyltransferase-like||glycosyltransferase-like 1||mannosyltransferase candidate||Glycosyltransferase-like domain containing 1||glycosyltransferase-like domain-containing protein 1 isoform e||glycosyltransferase-like domain-containing protein 1 isoform d||glycosyltransferase-like domain-containing protein 1 isoform b||glycosyltransferase-like domain-containing protein 1 isofo…	NP_078935	2	2q22.3	molecular function|transferase activity, transferring glycosyl groups|IEA|GO:0016757|GOA|na//biological process|biosynthetic process|IEA|GO:0009058|GOA|na			Q4AE62|G5EA49|G1UFN1|B8ZZ45|H7BYJ5
109	cg26379475	-0.54711	170850	36	2	160648405	NM_133329.4	KCNG3	Hs.352633	potassium voltage-gated channel, subfamily G, member 3	||KCNG3||voltage-gated potassium channel 6.3||voltage-gated potassium channel Kv10.1||voltage-gated potassium channel subunit Kv6.3||voltage-gated potassium channel subunit Kv6.4||voltage-gated potassium channel subunit Kv10.1||potassium voltage-gated channel, subfamily G, member 3||POTASSIUM CHANNEL, VOLTAGE-GATED, SUBFAMILY G, MEMBER 3||potassium voltage-gated channel subfamily G member 3 isofo…	NP_758847	2	2p21	molecular function|delayed rectifier potassium channel activity|IBA|GO:0005251|GOA|na//molecular function|protein binding|IPI|GO:0005515|GOA|11852086//biological process|potassium ion transmembrane transport|IBA|GO:0071805|GOA|na//biological process|protein homooligomerization|IEA|GO:0051260|GOA|na//biological process|regulation of ion transmembrane transport|IEA|GO:0034765|GOA|na//biological pro…	potassium channel subunit. modulates channel activity.	cell membrane; multi-pass membrane protein. membrane; multi-pass membrane protein. note=has to be associated with kcnb1 or possibly another partner to get inserted in the plasma membrane. remains intracellular in the absence of kcnb1.	Q8TAE7
110	cg27003571	-0.675386	79712	36	2	144768299	NM_001006636	GTDC1	Hs.44780	glycosyltransferase-like domain containing 1	||Hmat-Xa||GTDC1||mannosyltransferase-like||glycosyltransferase-like 1||mannosyltransferase candidate||Glycosyltransferase-like domain containing 1||glycosyltransferase-like domain-containing protein 1 isoform e||glycosyltransferase-like domain-containing protein 1 isoform d||glycosyltransferase-like domain-containing protein 1 isoform b||glycosyltransferase-like domain-containing protein 1 isofo…	NP_078935	2	2q22.3	molecular function|transferase activity, transferring glycosyl groups|IEA|GO:0016757|GOA|na//biological process|biosynthetic process|IEA|GO:0009058|GOA|na			Q4AE62|G5EA49|G1UFN1|B8ZZ45|H7BYJ5
111	cg27553955	1.21564	170850	36	2	42573830	NM_133329	KCNG3	Hs.352633	potassium voltage-gated channel, subfamily G, member 3	||KCNG3||voltage-gated potassium channel 6.3||voltage-gated potassium channel Kv10.1||voltage-gated potassium channel subunit Kv6.3||voltage-gated potassium channel subunit Kv6.4||voltage-gated potassium channel subunit Kv10.1||potassium voltage-gated channel, subfamily G, member 3||POTASSIUM CHANNEL, VOLTAGE-GATED, SUBFAMILY G, MEMBER 3||potassium voltage-gated channel subfamily G member 3 isofo…	NP_758847	2	2p21	molecular function|delayed rectifier potassium channel activity|IBA|GO:0005251|GOA|na//molecular function|protein binding|IPI|GO:0005515|GOA|11852086//biological process|potassium ion transmembrane transport|IBA|GO:0071805|GOA|na//biological process|protein homooligomerization|IEA|GO:0051260|GOA|na//biological process|regulation of ion transmembrane transport|IEA|GO:0034765|GOA|na//biological pro…	potassium channel subunit. modulates channel activity.	cell membrane; multi-pass membrane protein. membrane; multi-pass membrane protein. note=has to be associated with kcnb1 or possibly another partner to get inserted in the plasma membrane. remains intracellular in the absence of kcnb1.	Q8TAE7
