# Supplementary material for: DNA methylation profile is a quantitative measure of biological aging in children
Source: Aging (Albany NY). 2019 Nov 22;11(22):10031–51. doi: 10.18632/aging.102399 (PMC6914436; doi:10.18632/aging.102399)
Supplement: Supplementary Table 3 [file aging-11-102399-s001..xlsx]

## Sheet: Supplement-03
Term_ID	Description	Frequency	plot_X	plot_Y	plot_size	Log10 p-value	Uniqueness	Dispensability	Representative	Eliminated
GO:0002376	immune system process	0.1646	-0.507	0.344	3.455	-2.0259	0.979	0	2376	0
GO:0007623	circadian rhythm	0.0113	1.641	1.583	2.292	-2	0.975	0	7623	0
GO:0070252	actin-mediated cell contraction	0.0063	-3.721	-3.334	2.041	-3.4962	0.902	0	70252	0
GO:0009101	glycoprotein biosynthetic process	0.021	4.552	5.758	2.561	-2.8761	0.957	0.002	9101	0
GO:0043491	protein kinase B signaling	0.0087	1.307	4.579	2.182	-2.5406	0.897	0.011	43491	0
GO:0030098	lymphocyte differentiation	0.0182	3.556	-5.205	2.5	-3.2175	0.495	0.038	30098	0
GO:0042110	T cell activation	0.0264	null	null	2.661	-1.6968	0.64	0.853	30098	1
GO:0042113	B cell activation	0.016	null	null	2.444	-1.7258	0.661	0.762	30098	1
GO:0032943	mononuclear cell proliferation	0.015	null	null	2.415	-1.5817	0.882	0.972	30098	1
GO:0051249	regulation of lymphocyte activation	0.0262	null	null	2.658	-1.9469	0.601	0.812	30098	1
GO:0050863	regulation of T cell activation	0.0178	null	null	2.49	-1.4271	0.614	0.924	30098	1
GO:0046651	lymphocyte proliferation	0.0148	null	null	2.412	-1.5952	0.602	0.756	30098	1
GO:0002521	leukocyte differentiation	0.0269	null	null	2.669	-2.1319	0.541	0.803	30098	1
GO:0045619	regulation of lymphocyte differentiation	0.0083	null	null	2.158	-2.71	0.466	0.799	30098	1
GO:0070085	glycosylation	0.0174	0.482	6.466	2.48	-2.0991	0.931	0.038	70085	0
GO:0008361	regulation of cell size	0.0089	3.775	3.848	2.19	-2.6162	0.91	0.04	8361	0
GO:0040012	regulation of locomotion	0.0448	-6.298	-2.99	2.891	-2.3747	0.895	0.042	40012	0
GO:0008285	negative regulation of cell proliferation	0.0372	-4.973	-0.047	2.81	-1.8013	0.842	0.052	8285	0
GO:0010035	response to inorganic substance	0.0282	-5.565	2.062	2.689	-2.2	0.917	0.086	10035	0
GO:0046777	protein autophosphorylation	0.0133	-0.471	3.501	2.365	-1.8153	0.944	0.09	46777	0
GO:0006954	inflammatory response	0.0379	-1.087	-3.862	2.818	-1.3788	0.88	0.105	6954	0
GO:0045087	innate immune response	0.0512	null	null	2.949	-1.383	0.671	0.706	6954	1
GO:0009605	response to external stimulus	0.1204	-5.169	-5.227	3.32	-2.327	0.925	0.133	9605	0
GO:0007568	aging	0.0163	6.751	0.861	2.453	-1.5952	0.831	0.179	7568	0
GO:0001817	regulation of cytokine production	0.0339	3.419	-2.017	2.769	-2.6596	0.814	0.184	1817	0
GO:0048589	developmental growth	0.0327	7.304	0.302	2.754	-1.4634	0.818	0.196	48589	0
GO:0048011	neurotrophin TRK receptor signaling pathway	0.0015	-4.525	3.696	1.431	-1.3536	0.889	0.215	48011	0
GO:0019216	regulation of lipid metabolic process	0.0169	-0.364	6.015	2.467	-1.475	0.89	0.261	19216	0
GO:0048863	stem cell differentiation	0.0095	5.479	-2.448	2.217	-1.9547	0.787	0.271	48863	0
GO:0051146	striated muscle cell differentiation	0.0144	6.413	-4.58	2.4	-1.451	0.775	0.285	51146	0
GO:0042471	ear morphogenesis	0.0068	6.31	-3.838	2.072	-3.0259	0.744	0.302	42471	0
GO:0048562	embryonic organ morphogenesis	0.0165	null	null	2.456	-1.4271	0.748	0.796	42471	1
GO:0043583	ear development	0.0119	null	null	2.316	-1.9788	0.76	0.724	42471	1
GO:0048839	inner ear development	0.0104	null	null	2.258	-2.1851	0.759	0.916	42471	1
GO:0061564	axon development	0.0272	6.443	-1.239	2.675	-2.5544	0.66	0.309	61564	0
GO:0007409	axonogenesis	0.0252	null	null	2.641	-2.2041	0.646	0.789	61564	1
GO:0048667	cell morphogenesis involved in neuron differentiation	0.0308	null	null	2.728	-1.8894	0.641	0.877	61564	1
GO:0050770	regulation of axonogenesis	0.0088	null	null	2.185	-2.3862	0.631	0.833	61564	1
GO:0006629	lipid metabolic process	0.0796	0.965	6.32	3.14	-1.3439	0.922	0.322	6629	0
GO:0048732	gland development	0.0242	6.405	-2.538	2.623	-1.399	0.763	0.352	48732	0
GO:0045597	positive regulation of cell differentiation	0.0489	4.986	-3.05	2.929	-1.6459	0.649	0.355	45597	0
GO:0045596	negative regulation of cell differentiation	0.0356	null	null	2.791	-1.3757	0.681	0.702	45597	1
GO:0007399	nervous system development	0.1277	7.156	-2.324	3.345	-1.8013	0.735	0.357	7399	0
GO:0002683	negative regulation of immune system process	0.0215	-1.428	-7.386	2.573	-2.1561	0.692	0.384	2683	0
GO:0002250	adaptive immune response	0.0285	-1.014	-7.698	2.694	-1.5346	0.718	0.407	2250	0
GO:0009887	animal organ morphogenesis	0.0567	6.926	-3.028	2.993	-1.3382	0.721	0.432	9887	0
GO:0048468	cell development	0.1106	6.815	-3.502	3.283	-1.6757	0.713	0.451	48468	0
GO:0002682	regulation of immune system process	0.0834	-0.724	-7.816	3.16	-3.1965	0.691	0.499	2682	0
GO:0038179	neurotrophin signaling pathway	0.002	-4.155	3.946	1.544	-1.3401	0.887	0.502	38179	0
GO:0070661	leukocyte proliferation	0.0157	-3.91	0.758	2.436	-1.5058	0.894	0.519	70661	0
GO:0007420	brain development	0.039	7.127	-2.069	2.83	-2.1979	0.694	0.524	7420	0
GO:0021537	telencephalon development	0.0137	null	null	2.378	-1.7852	0.726	0.814	7420	1
GO:0001934	positive regulation of protein phosphorylation	0.0515	-1.882	2.68	2.951	-1.9136	0.857	0.544	1934	0
GO:0031401	positive regulation of protein modification process	0.0664	null	null	3.061	-2.0942	0.859	0.803	1934	1
GO:0050920	regulation of chemotaxis	0.0099	-6.011	-1.687	2.238	-2.2358	0.828	0.554	50920	0
GO:0030595	leukocyte chemotaxis	0.0111	null	null	2.286	-2.2048	0.667	0.731	50920	1
GO:0007417	central nervous system development	0.0518	7.192	-1.416	2.954	-1.3675	0.71	0.579	7417	0
GO:0030048	actin filament-based movement	0.0073	-4.018	-3.629	2.104	-3.1278	0.901	0.624	30048	0
GO:0050900	leukocyte migration	0.0265	-2.623	-6.04	2.663	-1.6421	0.677	0.634	50900	0
GO:0008610	lipid biosynthetic process	0.0387	1.461	6.437	2.827	-1.3507	0.914	0.635	8610	0
GO:0045595	regulation of cell differentiation	0.0871	6.583	-1.618	3.179	-1.4921	0.674	0.652	45595	0
GO:0006955	immune response	0.1186	-1.449	-7.175	3.313	-1.9245	0.684	0.653	6955	0
GO:0050778	positive regulation of immune response	0.045	-1.49	-6.381	2.893	-1.8239	0.618	0.656	50778	0
GO:0050776	regulation of immune response	0.058	null	null	3.003	-2.9788	0.633	0.805	50778	1
GO:0002684	positive regulation of immune system process	0.0605	null	null	3.021	-3.7212	0.641	0.771	50778	1
GO:0050727	regulation of inflammatory response	0.0169	null	null	2.467	-1.475	0.818	0.771	50778	1
GO:0045088	regulation of innate immune response	0.0228	null	null	2.598	-1.8928	0.64	0.801	50778	1
GO:0045089	positive regulation of innate immune response	0.0191	null	null	2.521	-1.7399	0.628	0.76	50778	1
GO:0046649	lymphocyte activation	0.0395	0.064	-7.841	2.836	-2.8601	0.647	0.683	46649	0
GO:0002263	cell activation involved in immune response	0.0391	null	null	2.831	-1.9281	0.624	0.768	46649	1
GO:0002366	leukocyte activation involved in immune response	0.039	null	null	2.83	-1.9469	0.618	0.763	46649	1
GO:0045664	regulation of neuron differentiation	0.0316	6.494	-2.005	2.74	-1.9508	0.604	0.693	45664	0
GO:0010720	positive regulation of cell development	0.0262	null	null	2.658	-1.6696	0.639	0.836	45664	1
GO:0048666	neuron development	0.0571	null	null	2.996	-2.27	0.639	0.774	45664	1
GO:0050767	regulation of neurogenesis	0.0386	null	null	2.825	-1.9393	0.598	0.892	45664	1
GO:0030182	neuron differentiation	0.0718	null	null	3.095	-1.8962	0.637	0.852	45664	1
GO:0008284	positive regulation of cell proliferation	0.0486	-3.821	0.292	2.926	-1.6073	0.813	0.698	8284	0
GO:0042127	regulation of cell proliferation	0.089	null	null	3.188	-1.5129	0.842	0.71	8284	1
GO:0050865	regulation of cell activation	0.0317	2.577	-8.403	2.741	-2.0292	0.764	0.7	50865	0
