# Supplementary material for: DNA methylation profile is a quantitative measure of biological aging in children
Source: Aging (Albany NY). 2019 Nov 22;11(22):10031–51. doi: 10.18632/aging.102399 (PMC6914436; doi:10.18632/aging.102399)
Supplement: Supplementary Table 4 [file aging-11-102399-s002..xlsx]

## Sheet: GSE27044_information
SampleID	age	predict_age	AAD	AMAR	group	sex	race
GSM666345	52	49.7332	-2.26682	0.956407	1-autism-sib	Male	other
GSM666347	165	134.119	-30.881	0.812842	4-aspergers	Male	white
GSM666348	146	164.343	18.3426	1.12563	1-autism	Male	white
GSM666349	97	129.772	32.7723	1.33786	1-autism	Male	white
GSM666350	146	173.684	27.6838	1.18962	1-autism-sib	Male	white
GSM666351	81	75.6779	-5.32214	0.934295	1-autism-sib	Male	more-than-one-race
GSM666352	177	164.203	-12.7972	0.927699	1-autism-sib	Male	white
GSM666353	108	98.9683	-9.0317	0.916373	1-autism-sib	Male	white
GSM666354	49	61.2611	12.2611	1.25023	1-autism-sib	Male	white
GSM666355	127	115.635	-11.365	0.910512	1-autism-sib	Male	white
GSM666359	98	82.6904	-15.3096	0.84378	1-autism	Male	white
GSM666360	71	58.4992	-12.5008	0.823932	1-autism	Male	white
GSM666361	138	127.046	-10.9535	0.920627	1-autism-sib	Male	white
GSM666362	83	65.3833	-17.6167	0.78775	1-autism-sib	Male	white
GSM666364	168	140.187	-27.8131	0.834446	1-autism-sib	Male	white
GSM666365	71	65.3277	-5.67233	0.920108	1-autism-sib	Male	white
GSM666366	184	184.203	0.202547	1.0011	1-autism	Male	white
GSM666371	104	100.012	-3.98779	0.961656	1-autism	Male	white
GSM666372	54	59.5631	5.56306	1.10302	1-autism-sib	Male	white
GSM666373	94	99.2571	5.25715	1.05593	1-autism	Male	white
GSM666374	173	150.991	-22.0093	0.872779	1-autism-sib	Male	white
GSM666375	127	103.563	-23.4369	0.815457	1-autism-sib	Male	white
GSM666376	56	35.3173	-20.6827	0.630666	2-asd	Male	more-than-one-race
GSM666377	110	85.3337	-24.6663	0.775761	1-autism-sib	Male	white
GSM666378	115	114.618	-0.381928	0.996679	1-autism	Male	white
GSM666379	77	136.263	59.2629	1.76965	1-autism	Male	other
GSM666380	163	103.235	-59.7645	0.633347	1-autism	Male	white
GSM666382	79	78.7961	-0.203894	0.997419	1-autism	Male	white
GSM666385	158	141.479	-16.5207	0.895439	1-autism-sib	Male	white
GSM666387	123	117.944	-5.05557	0.958898	1-autism-sib	Male	white
GSM666388	80	37.6919	-42.3081	0.471148	1-autism	Male	white
GSM666389	118	122.378	4.37775	1.0371	1-autism	Male	asian
GSM666390	102	110.123	8.1228	1.07964	1-autism	Male	white
GSM666391	148	142.73	-5.26983	0.964393	1-autism-sib	Male	white
GSM666393	119	116.151	-2.84939	0.976056	1-autism-sib	Male	asian
GSM666394	57	49.0682	-7.93181	0.860845	1-autism-sib	Male	white
GSM666395	118	110.327	-7.67336	0.934971	1-autism	Male	white
GSM666398	69	69.4034	0.4034	1.00585	1-autism	Male	white
GSM666399	73	60.2326	-12.7674	0.825104	1-autism	Male	asian
GSM666400	138	119.466	-18.5345	0.865692	1-autism	Male	white
GSM666401	76	104.907	28.9068	1.38035	1-autism	Male	white
GSM666402	120	87.3259	-32.6741	0.727716	2-asd	Male	other
GSM666403	122	102.598	-19.4019	0.840968	1-autism	Male	white
GSM666404	186	178.805	-7.19523	0.961316	1-autism	Male	other
GSM666405	162	166.296	4.29614	1.02652	2-asd-sib	Male	white
GSM666407	157	138.254	-18.7462	0.880597	1-autism	Male	white
GSM666408	155	116.506	-38.4939	0.751652	1-autism-sib	Male	white
GSM666410	123	96.2048	-26.7952	0.782153	1-autism-sib	Male	white
GSM666411	175	86.7406	-88.2594	0.49566	1-autism-sib	Male	white
GSM666412	175	129.583	-45.4173	0.740472	1-autism	Male	white
GSM666413	72	80.6025	8.6025	1.11948	1-autism-sib	Male	white
GSM666415	97	105.539	8.53879	1.08803	1-autism-sib	Male	white
GSM666416	93	99.2527	6.25274	1.06723	1-autism	Male	more-than-one-race
GSM666417	127	134.763	7.76258	1.06112	1-autism	Male	white
GSM666418	147	129.185	-17.8153	0.878807	1-autism	Male	white
GSM666419	136	133.251	-2.74893	0.979787	1-autism	Male	white
GSM666421	205	180.942	-24.0582	0.882643	1-autism	Male	white
GSM666423	190	187.486	-2.51413	0.986768	2-asd	Male	white
GSM666424	70	56.1704	-13.8296	0.802434	1-autism	Male	white
GSM666425	131	98.486	-32.514	0.751802	1-autism	Male	more-than-one-race
GSM666427	136	117.878	-18.1218	0.866751	1-autism	Male	white
GSM666428	88	59.6183	-28.3817	0.677481	1-autism	Male	white
GSM666430	187	163.049	-23.9514	0.871918	1-autism	Male	white
GSM666431	73	85.2622	12.2622	1.16798	1-autism-sib	Male	white
GSM666432	96	96.6013	0.601345	1.00626	1-autism-sib	Male	asian
GSM666434	51	57.216	6.21604	1.12188	1-autism-sib	Male	more-than-one-race
GSM666436	59	44.8868	-14.1132	0.760792	1-autism-sib	Male	more-than-one-race
GSM666437	81	93.4185	12.4185	1.15332	1-autism	Male	more-than-one-race
GSM666440	109	118.592	9.59231	1.088	1-autism-sib	Male	white
GSM666441	161	146.17	-14.8303	0.907886	1-autism-sib	Male	white
GSM666442	108	103.508	-4.49216	0.958406	1-autism	Male	other
GSM666444	100	102.147	2.14742	1.02147	1-autism	Male	white
GSM666446	70	56.7828	-13.2172	0.811183	1-autism-sib	Male	white
GSM666447	132	120.844	-11.1557	0.915487	1-autism-sib	Male	white
GSM666449	78	87.9066	9.90663	1.12701	1-autism-sib	Male	white
GSM666450	134	130.235	-3.76492	0.971904	1-autism-sib	Male	white
GSM666451	165	162.133	-2.8666	0.982627	1-autism-sib	Male	white
GSM666452	97	94.7296	-2.27041	0.976594	1-autism	Male	white
GSM666454	151	133.735	-17.2649	0.885663	2-asd-sib	Male	other
GSM666455	116	96.6026	-19.3974	0.832781	1-autism	Male	white
GSM666456	163	118.779	-44.2209	0.728706	1-autism	Male	white
GSM666457	168	153.263	-14.7371	0.912279	1-autism-sib	Male	white
GSM666458	129	124.766	-4.23422	0.967177	1-autism-sib	Male	white
GSM666463	58	133.584	75.5836	2.30317	1-autism	Male	more-than-one-race
GSM666466	56	52.6723	-3.3277	0.940577	1-autism-sib	Male	white
GSM666467	112	90.4914	-21.5086	0.807959	1-autism-sib	Male	white
GSM666468	190	152.725	-37.2751	0.803815	1-autism	Male	white
GSM666469	144	117.188	-26.8124	0.813803	4-aspergers-sib	Male	white
GSM666470	91	89.0138	-1.98625	0.978173	1-autism	Male	white
GSM666473	202	181.577	-20.4234	0.898894	1-autism-sib	Male	white
GSM666475	116	101.343	-14.6568	0.873648	1-autism	Male	white
GSM666476	98	96.9533	-1.04668	0.98932	1-autism	Male	white
GSM666478	129	104.679	-24.3209	0.811466	1-autism	Male	white
GSM666479	68	56.609	-11.391	0.832486	1-autism-sib	Male	white
GSM666480	127	148.089	21.0894	1.16606	1-autism	Male	white
GSM666481	175	149.408	-25.5919	0.853761	1-autism	Male	more-than-one-race
GSM666483	93	78.9477	-14.0523	0.8489	1-autism-sib	Male	white
GSM666484	105	59.5602	-45.4398	0.56724	1-autism	Male	white
GSM666486	131	113.625	-17.3749	0.867367	1-autism-sib	Male	white
GSM666489	156	150.434	-5.56612	0.96432	1-autism	Male	african-amer
GSM666492	186	172.464	-13.5363	0.927224	1-autism	Male	white
GSM666493	162	145.489	-16.511	0.89808	2-asd-sib	Male	white
GSM666494	64	47.221	-16.779	0.737828	1-autism	Male	white
GSM666495	151	92.4937	-58.5063	0.612541	1-autism	Male	white
GSM666496	169	158.508	-10.4922	0.937916	1-autism-sib	Male	more-than-one-race
GSM666497	110	139.373	29.373	1.26703	1-autism	Male	white
GSM666498	148	119.89	-28.1099	0.810068	1-autism	Male	white
GSM666500	61	42.542	-18.458	0.69741	1-autism-sib	Male	white
GSM666502	212	192.159	-19.8407	0.906412	1-autism-sib	Male	other
GSM666504	100	76.9751	-23.0249	0.769751	1-autism	Male	white
GSM666506	119	119.574	0.57419	1.00483	1-autism-sib	Male	white
GSM666507	142	133.533	-8.46711	0.940372	1-autism-sib	Male	white
GSM666509	189	173.971	-15.0293	0.92048	1-autism-sib	Male	african-amer
GSM666510	98	123.44	25.4405	1.2596	1-autism	Male	asian
GSM666511	123	110.46	-12.5398	0.89805	1-autism-sib	Male	white
GSM666512	79	85.2939	6.29391	1.07967	1-autism	Male	white
GSM666515	155	137.494	-17.5062	0.887057	1-autism-sib	Male	other
GSM666516	140	140.828	0.827988	1.00591	1-autism-sib	Male	white
GSM666518	67	55.5199	-11.4801	0.828656	1-autism-sib	Male	white
GSM666519	90	83.2779	-6.72211	0.92531	1-autism-sib	Male	white
GSM666520	89	133.388	44.3883	1.49875	1-autism-sib	Male	not-specified
GSM666522	78	72.3178	-5.68216	0.927152	1-autism	Male	white
GSM666523	168	201.837	33.8367	1.20141	1-autism	Male	white
GSM666524	86	58.686	-27.314	0.682395	1-autism	Male	white
GSM666525	133	133.224	0.224018	1.00168	1-autism	Male	more-than-one-race
GSM666526	156	144.062	-11.9377	0.923476	1-autism	Male	white
GSM666528	70	74.8431	4.84309	1.06919	1-autism-sib	Male	white
GSM666529	134	127.433	-6.5674	0.95099	1-autism-sib	Male	white
GSM666533	185	176.356	-8.64376	0.953277	1-autism-sib	Male	white
GSM666534	120	114.136	-5.86433	0.951131	1-autism	Male	white
GSM666535	88	68.0267	-19.9733	0.773031	1-autism	Male	white
GSM666536	128	132.088	4.0883	1.03194	1-autism-sib	Male	white
GSM666537	209	139.487	-69.5133	0.6674	1-autism-sib	Male	white
GSM666539	131	142.089	11.0889	1.08465	1-autism-sib	Male	more-than-one-race
GSM666540	108	82.6452	-25.3548	0.765233	1-autism	Male	white
GSM666541	212	169.536	-42.4637	0.7997	1-autism	Male	white
GSM666542	152	134.182	-17.8182	0.882775	1-autism-sib	Male	white
GSM666545	171	183.857	12.8566	1.07518	1-autism-sib	Male	white
GSM666546	77	58.5459	-18.4541	0.760336	2-asd-sib	Male	more-than-one-race
GSM666547	105	105.218	0.217601	1.00207	1-autism-sib	Male	white
GSM666548	51	41.1253	-9.87473	0.806378	1-autism-sib	Male	white
GSM666549	68	70.0771	2.07711	1.03055	1-autism	Male	white
GSM666550	102	110.345	8.34526	1.08182	1-autism	Male	white
GSM666551	51	38.4612	-12.5388	0.75414	1-autism-sib	Male	white
GSM666552	95	90.6265	-4.37348	0.953963	1-autism-sib	Male	more-than-one-race
GSM666553	165	145.819	-19.1813	0.88375	1-autism-sib	Male	white
GSM666555	127	127.3	0.300465	1.00237	1-autism-sib	Male	white
GSM666556	175	121.614	-53.3855	0.69494	1-autism	Male	white
GSM666557	91	106.535	15.5348	1.17071	1-autism	Male	white
GSM666559	134	126.622	-7.37805	0.94494	1-autism-sib	Male	asian
GSM666560	143	115.83	-27.1704	0.809997	2-asd	Male	white
GSM666561	139	109.72	-29.2799	0.789353	2-asd	Male	white
GSM666563	199	158.392	-40.6083	0.795938	1-autism	Male	white
GSM666564	126	124.29	-1.70976	0.98643	2-asd-sib	Male	white
GSM666566	165	175.087	10.0874	1.06114	1-autism-sib	Male	white
GSM666567	67	80.2359	13.2359	1.19755	1-autism	Male	not-specified
GSM666568	198	169.62	-28.3805	0.856664	1-autism-sib	Male	white
GSM666570	134	128.459	-5.54058	0.958652	1-autism	Male	white
GSM666571	79	79.5666	0.566645	1.00717	1-autism	Male	white
GSM666572	82	77.7662	-4.23383	0.948368	1-autism-sib	Male	white
GSM666573	60	64.5832	4.58323	1.07639	1-autism	Male	white
GSM666574	70	45.1258	-24.8742	0.644654	1-autism	Male	white
GSM666575	91	82.9667	-8.0333	0.911722	1-autism-sib	Male	white
GSM666577	126	83.7484	-42.2516	0.664669	1-autism	Male	white
GSM666578	178	142.731	-35.2693	0.801858	1-autism	Male	white
GSM666579	136	127.162	-8.83847	0.935011	1-autism	Male	white
GSM666580	102	90.1853	-11.8147	0.88417	1-autism-sib	Male	white
GSM666581	193	177.644	-15.356	0.920435	1-autism	Male	white
GSM666582	132	103.583	-28.4172	0.784719	1-autism	Male	white
GSM666584	112	101.528	-10.4716	0.906504	1-autism	Male	white
GSM666585	97	90.6005	-6.39955	0.934025	1-autism-sib	Male	white
GSM666588	113	115.108	2.10796	1.01865	4-aspergers	Male	white
GSM666589	84	79.8951	-4.10487	0.951133	1-autism	Male	asian
GSM666591	123	122.322	-0.67819	0.994486	1-autism-sib	Male	white
GSM666595	161	118.21	-42.7897	0.734225	1-autism-sib	Male	white
GSM666598	127	147.001	20.0014	1.15749	1-autism	Male	white
GSM666600	73	80.0588	7.05877	1.0967	1-autism	Male	more-than-one-race
GSM666601	63	68.6035	5.60354	1.08895	1-autism-sib	Male	white
GSM666602	97	102.99	5.99008	1.06175	1-autism-sib	Male	white
GSM666603	61	72.386	11.386	1.18666	1-autism	Male	white
GSM666604	133	122.9	-10.1003	0.924058	1-autism	Male	white
GSM666605	96	101.204	5.20367	1.0542	1-autism-sib	Male	more-than-one-race
GSM666608	87	99.3378	12.3378	1.14181	4-aspergers-sib	Male	white
GSM666611	178	127.789	-50.2111	0.717915	1-autism	Male	white
GSM666612	115	112.202	-2.7983	0.975667	1-autism	Male	white
GSM666614	62	82.0687	20.0687	1.32369	1-autism-sib	Male	white
GSM666616	138	121.287	-16.7126	0.878894	1-autism	Male	white
GSM666619	121	103.051	-17.9491	0.85166	1-autism	Male	white
GSM666621	159	154.09	-4.9095	0.969123	1-autism-sib	Male	white
GSM666623	103	95.8725	-7.12748	0.930801	1-autism-sib	Male	asian
GSM666629	181	148.677	-32.3225	0.821422	1-autism	Male	white
GSM666630	112	128.853	16.8531	1.15047	1-autism-sib	Male	white
GSM666635	88	143.475	55.4752	1.6304	1-autism	Male	more-than-one-race
GSM666637	197	170.135	-26.8645	0.863632	1-autism	Male	white
GSM666640	155	166.041	11.0406	1.07123	1-autism-sib	Male	white
GSM666643	78	96.2932	18.2932	1.23453	1-autism	Male	asian
GSM666645	189	180.433	-8.5672	0.954671	1-autism-sib	Male	more-than-one-race
GSM666648	84	100.759	16.759	1.19951	1-autism	Male	white
GSM666649	82	71.2585	-10.7415	0.869007	1-autism-sib	Male	more-than-one-race
GSM666652	58	89.5472	31.5472	1.54392	1-autism	Male	more-than-one-race
GSM666653	152	138.333	-13.6674	0.910083	1-autism-sib	Male	more-than-one-race
GSM666654	129	132.378	3.37761	1.02618	2-asd-sib	Male	white
GSM666655	209	157.382	-51.6181	0.753023	1-autism-sib	Male	white
GSM666656	132	124.305	-7.6946	0.941708	1-autism	Male	more-than-one-race
GSM666657	161	139.803	-21.1967	0.868343	1-autism	Male	white
GSM666658	56	47.3443	-8.65572	0.845434	1-autism-sib	Male	asian
GSM666662	161	152.045	-8.95475	0.94438	1-autism-sib	Male	white
GSM666663	186	167.427	-18.5729	0.900146	1-autism	Male	white
GSM666664	173	143.755	-29.2448	0.830955	1-autism	Male	white
GSM666666	214	167.113	-46.887	0.780902	1-autism-sib	Male	white
GSM666670	184	184.176	0.176254	1.00096	1-autism	Male	white
GSM666672	82	94.4528	12.4528	1.15186	1-autism-sib	Male	white
GSM666673	62	86.2568	24.2568	1.39124	2-asd	Male	white
GSM666676	201	206.82	5.81982	1.02895	1-autism	Male	white
GSM666680	89	99.3272	10.3272	1.11604	1-autism-sib	Male	white
GSM666681	119	135.682	16.6824	1.14019	1-autism	Male	more-than-one-race
GSM666685	73	63.7094	-9.29063	0.872731	1-autism-sib	Male	more-than-one-race
GSM666686	142	129.586	-12.414	0.912577	1-autism-sib	Male	more-than-one-race
GSM666687	112	102.447	-9.55257	0.914709	1-autism	Male	white
GSM666692	114	81.6202	-32.3798	0.715967	1-autism	Male	more-than-one-race
GSM666693	71	62.6148	-8.3852	0.881899	1-autism-sib	Male	white
GSM666694	68	119.8	51.8	1.76176	1-autism	Male	white
GSM666695	190	185.37	-4.62955	0.975634	1-autism	Male	white
GSM666696	81	72.9521	-8.04786	0.900644	1-autism-sib	Male	more-than-one-race
GSM666699	130	98.2729	-31.7271	0.755945	1-autism	Male	more-than-one-race
GSM666700	63	64.1378	1.13778	1.01806	1-autism	Male	white
GSM666701	198	179.528	-18.4724	0.906705	1-autism-sib	Male	white
GSM666703	176	146.946	-29.0539	0.834921	1-autism-sib	Male	white
GSM666705	76	100.881	24.8811	1.32738	1-autism	Male	white
GSM666706	140	117.425	-22.5752	0.838749	1-autism	Male	white
GSM666707	93	95.2466	2.2466	1.02416	1-autism-sib	Male	white
GSM666708	179	168.267	-10.7334	0.940037	1-autism-sib	Male	white
GSM666709	49	46.7631	-2.23687	0.95435	1-autism	Male	white
GSM666710	107	109.709	2.70904	1.02532	1-autism	Male	white
GSM666711	70	67.9555	-2.04453	0.970792	2-asd-sib	Male	white
GSM666712	174	146.289	-27.7108	0.840742	1-autism-sib	Male	white
GSM666713	111	125.164	14.164	1.1276	2-asd	Male	white
GSM666714	87	82.1401	-4.85989	0.944139	1-autism-sib	Male	white
GSM666715	111	95.0782	-15.9218	0.856561	1-autism	Male	white
GSM666716	87	109.075	22.0747	1.25373	1-autism-sib	Male	other
GSM666718	183	174.064	-8.93628	0.951168	1-autism-sib	Male	white
GSM666719	89	107.269	18.2691	1.20527	1-autism-sib	Male	white
GSM666720	193	206.674	13.6742	1.07085	1-autism	Male	white
GSM666721	141	142.167	1.16741	1.00828	1-autism-sib	Male	african-amer
GSM666722	132	107.714	-24.2864	0.816012	1-autism	Male	other
GSM666723	128	141.376	13.3759	1.1045	1-autism	Male	african-amer
GSM666724	51	48.2808	-2.71915	0.946683	1-autism	Male	white
GSM666725	189	179.3	-9.70012	0.948677	1-autism	Male	asian
GSM666726	128	154.09	26.0895	1.20382	1-autism-sib	Male	white
GSM666727	204	181.225	-22.7746	0.88836	1-autism-sib	Male	asian
GSM666728	144	135.656	-8.34369	0.942058	1-autism	Male	white
GSM666729	74	68.4657	-5.53426	0.925213	1-autism-sib	Male	white
GSM666731	75	73.7675	-1.23246	0.983567	2-asd-sib	Male	white
GSM666732	113	71.3374	-41.6626	0.631304	1-autism	Male	white
GSM666733	68	104.644	36.6444	1.53889	1-autism	Male	white
GSM666734	188	167.702	-20.2977	0.892033	1-autism	Male	white
GSM666735	204	163.946	-40.0541	0.803657	1-autism-sib	Male	white
GSM666736	56	60.78	4.78002	1.08536	1-autism-sib	Male	white
GSM666737	104	96.4867	-7.51332	0.927757	2-asd	Male	white
GSM666738	144	128.69	-15.3105	0.893677	1-autism-sib	Male	white
GSM666739	74	93.5654	19.5654	1.2644	1-autism	Male	white
GSM666740	104	131.51	27.5101	1.26452	1-autism	Male	white
GSM666741	140	121.035	-18.9654	0.864533	1-autism	Male	not-specified
GSM666742	111	89.4636	-21.5364	0.805978	1-autism-sib	Male	white
GSM666744	135	124.869	-10.1311	0.924955	1-autism-sib	Male	white
GSM666745	105	132.936	27.9361	1.26606	1-autism	Male	white
GSM666747	140	158.934	18.9336	1.13524	1-autism	Male	white
GSM666748	48	45.2332	-2.76683	0.942358	1-autism-sib	Male	white
GSM666749	69	79.1361	10.1361	1.1469	1-autism-sib	Male	white
GSM666750	98	75.3819	-22.6181	0.769203	1-autism	Male	white
GSM666751	190	169.84	-20.1601	0.893894	1-autism-sib	Male	not-specified
GSM666752	88	119.766	31.7656	1.36097	1-autism	Male	white
GSM666754	83	81.7512	-1.24877	0.984955	1-autism-sib	Male	white
GSM666755	122	129.343	7.34324	1.06019	1-autism	Male	white
GSM666757	177	149.473	-27.5273	0.844479	1-autism	Male	white
GSM666758	139	153.943	14.9428	1.1075	1-autism	Male	more-than-one-race
GSM666759	125	125.234	0.234465	1.00188	1-autism	Male	white
GSM666760	208	205.103	-2.89749	0.98607	1-autism-sib	Male	more-than-one-race
GSM666761	119	128.764	9.76402	1.08205	1-autism-sib	Male	white
GSM666762	106	113.45	7.44984	1.07028	1-autism-sib	Male	white
GSM666763	94	132.412	38.4125	1.40864	1-autism	Male	white
GSM666764	150	164.046	14.0465	1.09364	1-autism	Male	white
GSM666765	173	176.84	3.8399	1.0222	1-autism-sib	Male	white
GSM666767	54	66.0764	12.0764	1.22364	1-autism	Male	white
GSM666768	105	119.361	14.3615	1.13678	1-autism-sib	Male	white
GSM666770	100	115.122	15.122	1.15122	1-autism-sib	Male	not-specified
GSM666771	119	108.952	-10.0479	0.915564	1-autism-sib	Male	other
GSM666772	65	67.4396	2.4396	1.03753	1-autism-sib	Male	white
GSM666773	127	151.944	24.9444	1.19641	1-autism	Male	not-specified
GSM666775	68	64.3842	-3.61577	0.946827	1-autism	Male	other
GSM666776	91	104.809	13.8087	1.15174	1-autism	Male	white
GSM666777	95	100.095	5.09515	1.05363	4-aspergers-sib	Male	white
GSM666778	176	146.598	-29.4019	0.832944	1-autism	Male	white
GSM666779	77	66.0325	-10.9675	0.857565	1-autism	Male	white
GSM666780	93	93.3346	0.334561	1.0036	2-asd-sib	Male	white
GSM666781	157	142.132	-14.868	0.905299	1-autism-sib	Male	white
GSM666783	63	62.2901	-0.709897	0.988732	2-asd	Male	white
GSM666784	119	94.8761	-24.1239	0.797278	1-autism	Male	white
GSM666785	75	67.9642	-7.03581	0.906189	4-aspergers	Male	white
GSM666786	111	113.905	2.90528	1.02617	1-autism-sib	Male	white
GSM666787	49	50.3201	1.32014	1.02694	1-autism-sib	Male	white
GSM666788	195	191.606	-3.39405	0.982595	1-autism-sib	Male	white
GSM666789	52	44.098	-7.90202	0.848038	1-autism-sib	Male	white
GSM666790	143	136.352	-6.64835	0.953508	1-autism-sib	Male	white
GSM666791	57	37.1649	-19.8351	0.652016	2-asd	Male	white
GSM666792	83	81.2151	-1.78488	0.978495	2-asd-sib	Male	white
GSM666793	63	44.7555	-18.2445	0.710405	1-autism	Male	white
GSM666794	194	182.126	-11.8745	0.938791	1-autism	Male	white
GSM666796	85	73.0777	-11.9223	0.859738	1-autism-sib	Male	white
GSM666797	77	88.3312	11.3312	1.14716	1-autism	Male	white
GSM666798	119	140.903	21.9032	1.18406	1-autism-sib	Male	white
GSM666799	141	138.52	-2.4797	0.982413	1-autism	Male	white
GSM666800	170	149.932	-20.068	0.881953	1-autism-sib	Male	white
GSM666801	103	107.28	4.27978	1.04155	1-autism-sib	Male	white
GSM666802	140	124.196	-15.804	0.887114	1-autism	Male	white
GSM666803	126	134.942	8.94175	1.07097	1-autism	Male	white
GSM666804	159	143.825	-15.1746	0.904562	1-autism	Male	white
GSM666805	106	88.7237	-17.2763	0.837016	1-autism	Male	white
GSM666806	111	116.649	5.64902	1.05089	1-autism-sib	Male	white
GSM666807	138	142.571	4.57113	1.03312	1-autism-sib	Male	white
GSM666809	134	126.416	-7.58352	0.943407	1-autism-sib	Male	white
GSM666810	157	171.456	14.4563	1.09208	1-autism	Male	white
GSM666811	107	81.0935	-25.9065	0.757884	1-autism	Male	white
GSM666812	100	100.41	0.410099	1.0041	1-autism-sib	Male	white
GSM666813	43	34.1716	-8.82841	0.794688	2-asd-sib	Male	more-than-one-race
GSM666814	72	99.6384	27.6384	1.38387	1-autism	Male	white
GSM666815	82	64.8301	-17.1699	0.790611	1-autism	Male	white
GSM666816	129	140.133	11.1328	1.0863	1-autism	Male	white
GSM666817	65	80.0213	15.0213	1.2311	2-asd	Male	more-than-one-race
GSM666818	165	121.895	-43.105	0.738758	1-autism-sib	Male	white
GSM666819	115	126.353	11.3526	1.09872	2-asd-sib	Male	white
GSM666820	48	81.8002	33.8002	1.70417	2-asd	Male	white
GSM666822	101	92.2798	-8.72015	0.913662	1-autism-sib	Male	white
GSM666823	169	190.67	21.6698	1.12822	1-autism-sib	Male	white
GSM666824	95	109.079	14.079	1.1482	1-autism	Male	white
GSM666825	108	116.531	8.53108	1.07899	1-autism	Male	white
GSM666827	130	116.864	-13.1365	0.89895	4-aspergers	Male	more-than-one-race
GSM666828	97	115.912	18.9122	1.19497	1-autism-sib	Male	white
GSM666829	48	64.1684	16.1684	1.33684	1-autism-sib	Male	white
GSM666830	68	66.4665	-1.53345	0.977449	1-autism-sib	Male	white
GSM666831	162	144.326	-17.6735	0.890904	1-autism-sib	Male	white
GSM666832	68	73.6173	5.61732	1.08261	1-autism	Male	white
GSM666833	133	128.009	-4.99086	0.962475	1-autism	Male	white
GSM666835	71	87.6947	16.6947	1.23514	1-autism	Male	white
GSM666836	155	130.953	-24.0475	0.844855	1-autism-sib	Male	white
GSM666837	63	78.8202	15.8202	1.25111	1-autism	Male	white
GSM666838	75	74.4127	-0.587295	0.992169	1-autism-sib	Male	white
GSM666839	149	160.226	11.2261	1.07534	1-autism-sib	Male	more-than-one-race
GSM666840	175	170.373	-4.6273	0.973558	1-autism-sib	Male	white
GSM666841	174	184.657	10.657	1.06125	1-autism-sib	Male	white
GSM666842	132	127.036	-4.96425	0.962392	1-autism	Male	white
GSM666843	85	105.761	20.7606	1.24424	1-autism-sib	Male	white
GSM666844	157	174.116	17.1156	1.10902	1-autism	Male	white
GSM666845	124	93.7058	-30.2942	0.755692	1-autism	Male	white
GSM666846	86	119.476	33.4759	1.38925	1-autism	Male	more-than-one-race
GSM666849	182	176.639	-5.36128	0.970542	1-autism-sib	Male	white
GSM666850	94	95.8771	1.87705	1.01997	1-autism	Male	white
GSM666851	137	104.524	-32.4756	0.762952	1-autism	Male	asian
GSM666852	188	175.127	-12.8733	0.931525	1-autism	Male	asian
GSM666853	171	162.649	-8.35073	0.951165	1-autism	Male	white
GSM666854	153	164.777	11.7773	1.07698	1-autism-sib	Male	asian
GSM666855	111	139.239	28.2391	1.25441	1-autism	Male	white
GSM666856	162	148.341	-13.6586	0.915688	1-autism-sib	Male	asian
GSM666857	211	176.823	-34.177	0.838024	1-autism-sib	Male	white
GSM666858	158	186.895	28.8952	1.18288	1-autism	Male	white
GSM666859	195	176.332	-18.6675	0.904269	1-autism-sib	Male	white
GSM666862	184	134.424	-49.576	0.730565	1-autism	Male	white
GSM666865	56	38.1397	-17.8603	0.681066	2-asd-sib	Male	white
GSM666866	55	61.9884	6.9884	1.12706	1-autism-sib	Male	white
GSM666867	71	71.0159	0.0158669	1.00022	1-autism-sib	Male	white
GSM666868	108	123.473	15.473	1.14327	2-asd	Male	white
GSM666869	95	78.965	-16.035	0.83121	1-autism	Male	white
GSM666870	203	144.211	-58.7888	0.7104	1-autism-sib	Male	white
GSM666871	62	116.848	54.8475	1.88464	1-autism	Male	white
GSM666872	208	153.899	-54.1012	0.739898	1-autism	Male	white
GSM666873	202	181.684	-20.3162	0.899425	1-autism-sib	Male	white
GSM666875	103	104.062	1.06227	1.01031	1-autism	Male	white
GSM666876	123	148.315	25.3147	1.20581	1-autism	Male	white
GSM666877	130	132.644	2.6439	1.02034	1-autism	Male	asian
GSM666878	80	78.3249	-1.67515	0.979061	1-autism	Male	african-amer
GSM666879	146	150.644	4.64406	1.03181	1-autism-sib	Male	asian
GSM666880	67	52.2014	-14.7986	0.779125	1-autism	Male	white
GSM666881	166	159.506	-6.49407	0.960879	1-autism-sib	Male	white
GSM666882	53	46.8794	-6.12055	0.884518	1-autism-sib	Male	african-amer
GSM666883	151	103.14	-47.8596	0.683049	1-autism-sib	Male	white
GSM666884	140	129.367	-10.6329	0.92405	1-autism	Male	white
GSM666885	91	92.6181	1.61806	1.01778	1-autism-sib	Male	white
GSM666886	116	110.248	-5.75181	0.950415	1-autism-sib	Male	white
GSM666888	90	99.9397	9.93972	1.11044	1-autism-sib	Male	white
GSM666889	107	121.611	14.6107	1.13655	1-autism-sib	Male	white
GSM666890	173	161.484	-11.5163	0.933432	2-asd	Male	white
GSM666891	71	124.339	53.3386	1.75125	1-autism	Male	white
GSM666892	121	128.625	7.62453	1.06301	2-asd-sib	Male	white
GSM666893	170	182.949	12.9491	1.07617	1-autism-sib	Male	white
GSM666894	132	124.878	-7.12196	0.946046	1-autism	Male	white
GSM666895	151	152.079	1.07868	1.00714	1-autism	Male	white
GSM666896	61	87.6715	26.6715	1.43724	1-autism	Male	white
GSM666897	158	168.591	10.5905	1.06703	1-autism-sib	Male	white
GSM666898	145	143.827	-1.17276	0.991912	1-autism	Male	not-specified
GSM666899	49	41.5168	-7.48318	0.847282	1-autism	Male	white
GSM666901	96	139.087	43.0865	1.44882	1-autism	Male	white
GSM666902	78	146.598	68.5977	1.87946	1-autism-sib	Male	white
GSM666903	81	87.3131	6.31312	1.07794	1-autism-sib	Male	white
GSM666904	61	9.21591	-51.7841	0.15108	1-autism-sib	Male	white
GSM666905	103	114.347	11.3475	1.11017	1-autism	Male	white
GSM666906	104	39.345	-64.655	0.378318	1-autism-sib	Male	not-specified
GSM666907	176	167.532	-8.46832	0.951885	1-autism	Male	white
GSM666908	136	117.579	-18.4214	0.864549	1-autism	Male	more-than-one-race
GSM666909	96	112.408	16.4079	1.17092	1-autism-sib	Male	more-than-one-race
GSM666910	205	167.057	-37.9433	0.814911	4-aspergers	Male	white
GSM666911	86	83.2805	-2.71946	0.968378	1-autism	Male	white
GSM666912	160	155.275	-4.72469	0.970471	1-autism	Male	other
GSM666915	49	43.3678	-5.63222	0.885057	1-autism-sib	Male	white
GSM666916	153	123.4	-29.6001	0.806535	1-autism-sib	Male	white
GSM666917	145	128.881	-16.1188	0.888836	1-autism-sib	Male	other
GSM666918	157	161.093	4.09286	1.02607	4-aspergers-sib	Male	white
GSM666919	195	177.155	-17.845	0.908487	1-autism	Male	white
GSM666920	72	101.745	29.7448	1.41312	1-autism-sib	Male	white
GSM666921	80	92.3112	12.3112	1.15389	1-autism-sib	Male	white
GSM666922	51	69.4354	18.4354	1.36148	1-autism	Male	white
GSM666923	208	150.674	-57.3255	0.724396	1-autism	Male	white
GSM666924	123	132.242	9.24158	1.07513	1-autism-sib	Male	white
GSM666925	116	155.385	39.3847	1.33952	1-autism	Male	white
GSM666927	149	134.186	-14.8142	0.900576	1-autism	Male	white
GSM666928	105	92.2959	-12.7041	0.879008	1-autism	Male	white
GSM666929	146	128.063	-17.9373	0.877142	1-autism-sib	Male	white
GSM666930	183	163.724	-19.2761	0.894666	1-autism	Male	white
GSM666931	197	196.576	-0.423866	0.997848	1-autism-sib	Male	white
GSM666932	89	77.4448	-11.5552	0.870167	1-autism-sib	Male	white
GSM666933	49	59.7958	10.7958	1.22032	1-autism	Male	white
GSM666934	175	153.34	-21.6596	0.876231	1-autism-sib	Male	white
GSM666935	162	149.054	-12.9464	0.920084	1-autism-sib	Male	white
GSM666936	87	118.627	31.6267	1.36353	1-autism	Male	other
GSM666937	55	52.2731	-2.72685	0.950421	2-asd-sib	Male	white
GSM666938	50	52.1479	2.14788	1.04296	1-autism-sib	Male	other
GSM666941	144	150.521	6.52063	1.04528	1-autism	Male	white
GSM666942	196	165.171	-30.829	0.842709	1-autism	Male	african-amer
GSM666943	72	106.654	34.6542	1.48131	2-asd	Male	white
GSM666944	102	88.9911	-13.0089	0.872461	1-autism-sib	Male	white
GSM666945	187	163.912	-23.0882	0.876534	1-autism	Male	white
GSM666946	146	121.507	-24.4934	0.832237	2-asd	Male	white
GSM666947	126	115.927	-10.0726	0.920059	1-autism	Male	white
GSM666948	184	175.409	-8.5913	0.953308	1-autism	Male	white
GSM666949	180	169.202	-10.7983	0.940009	1-autism	Male	white
GSM666951	53	54.0619	1.06194	1.02004	1-autism	Male	white
GSM666953	197	196.106	-0.894193	0.995461	2-asd-sib	Male	white
GSM666954	167	152.575	-14.4248	0.913624	1-autism-sib	Male	white
GSM666955	109	68.5656	-40.4344	0.629042	1-autism-sib	Male	white
GSM666956	143	143.466	0.465979	1.00326	1-autism-sib	Male	white
GSM666957	175	161.857	-13.1429	0.924898	1-autism	Male	white
GSM666958	74	80.522	6.522	1.08814	2-asd	Male	white
GSM666959	96	98.456	2.45602	1.02558	2-asd-sib	Male	more-than-one-race
GSM666960	203	174.238	-28.7617	0.858317	1-autism-sib	Male	white
GSM666961	161	138.521	-22.4785	0.860382	2-asd-sib	Male	more-than-one-race
GSM666962	150	142.358	-7.64165	0.949056	2-asd	Male	more-than-one-race
GSM666963	97	108.458	11.4577	1.11812	1-autism	Male	white
GSM666964	76	67.4982	-8.50178	0.888134	1-autism-sib	Male	white
GSM666966	98	80.761	-17.239	0.824092	2-asd-sib	Male	white
GSM666967	139	155.472	16.4717	1.1185	2-asd	Male	more-than-one-race
GSM666969	121	113.221	-7.779	0.935711	1-autism	Male	white
GSM666970	180	167.724	-12.2757	0.931801	1-autism-sib	Male	white
GSM666971	155	150.309	-4.69144	0.969733	1-autism-sib	Male	white
GSM666972	108	114.386	6.38578	1.05913	1-autism	Male	white
GSM666973	78	54.1233	-23.8767	0.693888	1-autism	Male	white
GSM666974	172	154.024	-17.9764	0.895486	1-autism	Male	white
GSM666976	161	163.886	2.8861	1.01793	1-autism	Male	white
GSM666977	58	41.5182	-16.4818	0.715832	2-asd	Male	white
GSM666978	87	86.5642	-0.435785	0.994991	2-asd-sib	Male	white
GSM666979	149	148.702	-0.298095	0.997999	1-autism-sib	Male	white
GSM666980	140	137.335	-2.66476	0.980966	1-autism-sib	Male	white
GSM666982	107	92.5588	-14.4412	0.865035	1-autism	Male	white
GSM666983	170	132.197	-37.8029	0.77763	1-autism-sib	Male	white
GSM666984	87	120.472	33.4716	1.38473	1-autism-sib	Male	white
GSM666985	161	137.672	-23.3276	0.855108	1-autism	Male	white
GSM666986	173	171.296	-1.70403	0.99015	1-autism-sib	Male	asian
GSM666987	121	108.965	-12.0353	0.900535	1-autism	Male	white
GSM666988	51	41.6385	-9.3615	0.816441	1-autism-sib	Male	white
GSM666989	173	177.015	4.01503	1.02321	1-autism	Male	asian
GSM666990	129	124.016	-4.98353	0.961368	1-autism-sib	Male	white
GSM666992	77	80.7338	3.73384	1.04849	1-autism-sib	Male	white
GSM666993	68	91.1094	23.1094	1.33984	1-autism-sib	Male	white
GSM666995	79	99.9239	20.9239	1.26486	1-autism-sib	Male	white
GSM666996	114	133.676	19.6756	1.17259	2-asd	Male	white
GSM666997	82	85.1661	3.16609	1.03861	1-autism	Male	white
GSM666998	58	93.0124	35.0124	1.60366	1-autism	Male	african-amer
GSM666999	49	51.1538	2.15377	1.04395	1-autism	Male	white
GSM667000	147	140.392	-6.60847	0.955044	2-asd-sib	Male	white
GSM667001	64	42.317	-21.683	0.661203	1-autism-sib	Male	white
GSM667002	115	143.849	28.849	1.25086	1-autism	Male	white
GSM667003	131	138.386	7.38623	1.05638	1-autism	Male	white
GSM667004	108	109.607	1.60689	1.01488	1-autism-sib	Male	native-american
GSM667005	67	103.087	36.0872	1.53861	1-autism	Male	native-american
GSM667006	153	149.853	-3.14735	0.979429	1-autism-sib	Male	white
GSM667008	185	160.447	-24.5534	0.867279	1-autism	Male	white
GSM667009	186	195.762	9.76168	1.05248	1-autism	Male	white
GSM667010	83	89.364	6.36403	1.07668	1-autism	Male	white
GSM667011	98	87.2628	-10.7372	0.890436	1-autism-sib	Male	white
GSM667012	114	127.217	13.2171	1.11594	1-autism-sib	Male	white
GSM667013	174	152.305	-21.6948	0.875317	1-autism-sib	Male	african-amer
GSM667014	67	74.0772	7.07719	1.10563	1-autism	Male	white
GSM667015	157	159.939	2.93911	1.01872	1-autism-sib	Male	white
GSM667016	161	142.534	-18.4659	0.885305	1-autism	Male	more-than-one-race
GSM667017	100	116.489	16.4886	1.16489	1-autism-sib	Male	white
GSM667018	104	106.636	2.63595	1.02535	1-autism	Male	white
GSM667019	204	187.586	-16.4137	0.91954	1-autism	Male	white
GSM667021	78	72.8956	-5.10439	0.934559	1-autism	Male	white
GSM667022	50	77.989	27.989	1.55978	1-autism-sib	Male	white
GSM667023	91	91.2161	0.216137	1.00238	1-autism	Male	white
GSM667024	140	118.121	-21.8786	0.843724	1-autism-sib	Male	more-than-one-race
GSM667025	49	48.3139	-0.686052	0.985999	1-autism-sib	Male	more-than-one-race
GSM667026	87	99.3691	12.3691	1.14217	1-autism	Male	more-than-one-race
GSM667027	131	129.436	-1.56399	0.988061	1-autism-sib	Male	white
GSM667030	140	124.338	-15.6623	0.888127	1-autism	Male	white
GSM667031	48	70.3237	22.3237	1.46508	1-autism	Male	more-than-one-race
GSM667032	113	128.986	15.9857	1.14147	1-autism	Male	white
GSM667034	125	130.908	5.90831	1.04727	1-autism-sib	Male	more-than-one-race
GSM667036	140	135.476	-4.52383	0.967687	1-autism-sib	Male	white
GSM667037	92	134.016	42.0161	1.4567	1-autism-sib	Male	white
GSM667038	53	86.3146	33.3146	1.62858	1-autism	Male	white
GSM667039	65	70.3995	5.39945	1.08307	1-autism-sib	Male	white
GSM667040	81	83.5856	2.58559	1.03192	2-asd-sib	Male	white
GSM667041	206	181.359	-24.6409	0.880384	1-autism	Male	white
GSM667042	133	108.784	-24.2156	0.817928	1-autism	Male	white
GSM667045	66	79.0471	13.0471	1.19768	2-asd	Male	white
GSM667046	80	142.548	62.548	1.78185	1-autism	Male	white
GSM667047	72	71.3043	-0.695698	0.990338	1-autism	Male	white
GSM667048	105	82.9189	-22.0811	0.789704	1-autism-sib	Male	white
GSM667049	56	52.6394	-3.36061	0.939989	1-autism-sib	Male	white
GSM667050	84	100.794	16.7936	1.19992	1-autism	Male	white
GSM667051	105	105.471	0.470534	1.00448	1-autism-sib	Male	white
GSM667052	195	180.115	-14.8853	0.923665	1-autism-sib	Male	white
GSM667053	82	46.3121	-35.6879	0.564782	1-autism	Male	white
GSM667055	198	170.293	-27.7069	0.860066	1-autism-sib	Male	white
GSM667056	109	116.819	7.81884	1.07173	1-autism-sib	Male	white
GSM667058	131	142.123	11.1226	1.08491	1-autism	Male	white
GSM667059	213	226.078	13.0777	1.0614	1-autism	Male	white
GSM667060	112	119.744	7.74448	1.06915	1-autism-sib	Male	white
GSM667063	107	89.8683	-17.1317	0.839891	1-autism	Male	other
GSM667064	149	138.33	-10.6704	0.928387	1-autism-sib	Male	white
GSM667065	97	87.7006	-9.2994	0.90413	1-autism-sib	Male	white
GSM667066	107	107.895	0.894784	1.00836	1-autism	Male	white
GSM667067	116	128.525	12.5247	1.10797	1-autism	Male	white
GSM667068	93	100.412	7.41239	1.0797	1-autism-sib	Male	white
GSM667069	158	171.813	13.8126	1.08742	1-autism-sib	Male	white
GSM667071	195	143.075	-51.9246	0.73372	1-autism	Male	white
GSM667072	139	140.671	1.6714	1.01202	1-autism-sib	Male	white
GSM667073	116	94.754	-21.246	0.816845	1-autism	Male	white
GSM667074	160	150.361	-9.63897	0.939756	1-autism	Male	white
GSM667075	130	117.269	-12.7309	0.90207	1-autism	Male	white
GSM667076	105	129.82	24.8195	1.23638	1-autism-sib	Male	white
GSM667077	169	156.288	-12.7119	0.924782	1-autism-sib	Male	native-hawaiian
GSM667078	127	129.514	2.51362	1.01979	1-autism-sib	Male	white
GSM667079	86	65.2562	-20.7438	0.758793	1-autism	Male	white
GSM667080	125	140.536	15.5362	1.12429	1-autism-sib	Male	more-than-one-race
GSM667081	80	86.358	6.35795	1.07947	1-autism-sib	Male	white
GSM667082	139	156.379	17.3789	1.12503	1-autism	Male	white
GSM667084	87	90.1938	3.19375	1.03671	1-autism-sib	Male	white
GSM667085	80	102.034	22.0345	1.27543	1-autism	Male	more-than-one-race
GSM667086	101	120.228	19.2284	1.19038	1-autism	Male	white
GSM667087	148	138.071	-9.92872	0.932914	1-autism	Male	native-hawaiian
GSM667088	52	36.0631	-15.9369	0.693522	1-autism	Male	white
GSM667089	139	143.884	4.88372	1.03513	1-autism	Male	white
GSM667090	78	94.5188	16.5188	1.21178	1-autism-sib	Male	white
GSM667091	156	146.232	-9.76822	0.937383	1-autism-sib	Male	white
GSM667092	85	90.9709	5.97087	1.07025	2-asd-sib	Male	white
GSM667093	174	190.629	16.6288	1.09557	1-autism	Male	white
GSM667094	71	68.2578	-2.74225	0.961377	1-autism-sib	Male	white
GSM667095	115	98.3709	-16.6291	0.855399	1-autism	Male	white
GSM667097	82	73.6106	-8.38939	0.89769	1-autism-sib	Male	white
GSM667098	49	50.6816	1.68164	1.03432	2-asd	Male	white
GSM667099	95	99.2622	4.2622	1.04487	1-autism	Male	white
GSM667100	101	103.464	2.46449	1.0244	1-autism-sib	Male	white
GSM667101	71	83.1124	12.1124	1.1706	2-asd	Male	more-than-one-race
GSM667102	95	100.175	5.1755	1.05448	2-asd-sib	Male	more-than-one-race
GSM667103	94	79.4463	-14.5537	0.845174	1-autism	Male	white
GSM667104	71	44.2102	-26.7898	0.62268	1-autism-sib	Male	asian
GSM667105	184	159.308	-24.6921	0.865804	1-autism-sib	Male	white
GSM667106	69	67.1106	-1.88937	0.972618	1-autism-sib	Male	white
GSM667107	71	71.9314	0.931407	1.01312	1-autism-sib	Male	white
GSM667108	142	137.133	-4.86731	0.965723	1-autism	Male	white
GSM667110	155	130.812	-24.1877	0.84395	1-autism	Male	asian
GSM667111	53	81.5189	28.5189	1.53809	1-autism	Male	white
GSM667112	56	39.5583	-16.4417	0.706398	1-autism	Male	white
GSM667113	80	82.5145	2.51451	1.03143	1-autism-sib	Male	white
GSM667114	95	106.847	11.8475	1.12471	1-autism	Male	more-than-one-race
GSM667115	58	55.7187	-2.28133	0.960667	1-autism	Male	white
GSM667116	95	69.7281	-25.2719	0.73398	2-asd	Male	white
GSM667117	109	117.984	8.98373	1.08242	1-autism	Male	white
GSM667118	141	137.686	-3.31432	0.976494	1-autism-sib	Male	white
GSM667119	68	58.4794	-9.5206	0.859991	1-autism-sib	Male	white
GSM667120	70	64.8853	-5.11469	0.926933	1-autism-sib	Male	more-than-one-race
GSM667121	92	117.698	25.6983	1.27933	1-autism	Male	white
GSM667123	60	50.9937	-9.00631	0.849895	2-asd-sib	Male	white
GSM667124	48	49.2641	1.26411	1.02634	1-autism-sib	Male	white
GSM667126	72	95.6148	23.6148	1.32798	1-autism	Male	white
GSM667127	110	111.127	1.1269	1.01024	1-autism	Male	white
GSM667128	115	102.86	-12.1398	0.894437	1-autism	Male	white
GSM667129	80	61.9317	-18.0683	0.774146	1-autism-sib	Male	white
GSM667130	95	98.9271	3.92707	1.04134	1-autism-sib	Male	white
GSM667131	82	77.4188	-4.58118	0.944132	1-autism-sib	Male	white
GSM667133	82	95.8823	13.8823	1.1693	1-autism	Male	white
GSM667138	208	209.866	1.86587	1.00897	1-autism-sib	Male	more-than-one-race
GSM667139	94	89.2567	-4.74333	0.949539	1-autism	Male	white
GSM667141	87	106.207	19.2068	1.22077	1-autism-sib	Male	other
GSM667143	56	35.5259	-20.4741	0.63439	1-autism-sib	Male	asian
GSM667144	186	179.55	-6.44996	0.965323	1-autism	Male	white
GSM667145	161	149.067	-11.9325	0.925885	1-autism-sib	Male	white
GSM667147	71	76.2716	5.27157	1.07425	1-autism-sib	Male	white
GSM667148	56	84.4171	28.4171	1.50745	2-asd-sib	Male	white
GSM667150	55	55.1199	0.119904	1.00218	1-autism-sib	Male	white
GSM667152	203	151.554	-51.446	0.746572	1-autism-sib	Male	white
GSM667153	62	60.5602	-1.43978	0.976778	1-autism	Male	white
GSM667154	108	120.263	12.2633	1.11355	2-asd	Male	white
GSM667155	62	81.2851	19.2851	1.31105	1-autism	Male	white
GSM667156	61	70.7524	9.75239	1.15988	1-autism-sib	Male	white
GSM667157	151	136.675	-14.3246	0.905135	1-autism-sib	Male	white
GSM667158	203	144.23	-58.7702	0.710492	1-autism-sib	Male	white
GSM667159	56	72.4176	16.4176	1.29317	2-asd-sib	Male	white
GSM667160	176	126.218	-49.7822	0.717147	1-autism	Male	white
GSM667161	60	59.9599	-0.0401126	0.999331	2-asd-sib	Male	white
GSM667163	109	125.622	16.6221	1.1525	1-autism-sib	Male	white
GSM667164	78	92.7242	14.7242	1.18877	1-autism-sib	Male	white
GSM667165	140	138.579	-1.42134	0.989848	1-autism	Male	white
GSM667166	195	176.237	-18.7633	0.903778	1-autism	Male	white
GSM667167	50	35.3574	-14.6426	0.707149	1-autism-sib	Male	white
GSM667168	104	106.228	2.2282	1.02143	1-autism-sib	Male	not-specified
GSM667169	114	135.004	21.0036	1.18424	4-aspergers	Male	white
GSM667170	95	99.3684	4.36837	1.04598	1-autism	Male	white
GSM667171	78	101.733	23.7326	1.30426	1-autism-sib	Male	white
GSM667177	90	110.377	20.3766	1.22641	4-aspergers-sib	Male	white
GSM667185	131	141.179	10.1789	1.0777	1-autism-sib	Male	white
GSM667186	83	106.39	23.3905	1.28181	1-autism	Male	white
GSM667187	147	146.011	-0.988693	0.993274	2-asd	Male	white
GSM667188	112	132.237	20.2366	1.18068	1-autism-sib	Male	white
GSM667189	171	154.051	-16.9487	0.900885	2-asd-sib	Male	white
GSM667190	192	92.6884	-99.3116	0.482752	1-autism	Male	white
GSM667191	127	129.202	2.20182	1.01734	1-autism-sib	Male	not-specified
GSM667192	134	146.662	12.662	1.09449	1-autism	Male	white
GSM667193	168	127.579	-40.4205	0.759402	1-autism-sib	Male	white
GSM667194	86	70.015	-15.985	0.814128	1-autism	Male	not-specified
GSM667196	75	78.9997	3.99969	1.05333	1-autism-sib	Male	white
GSM667198	118	117.669	-0.331423	0.997191	1-autism	Male	white
GSM667199	159	155.972	-3.02848	0.980953	1-autism-sib	Male	white
GSM667200	97	110.226	13.2264	1.13635	1-autism-sib	Male	other
GSM667201	103	100.959	-2.04138	0.980181	1-autism-sib	Male	white
GSM667203	70	86.3951	16.3951	1.23422	1-autism	Male	white
GSM667204	167	141.281	-25.7194	0.845992	1-autism	Male	white
GSM667205	97	116.351	19.3508	1.19949	1-autism	Male	other
GSM667206	89	92.4534	3.45343	1.0388	1-autism-sib	Male	white
GSM667207	86	96.6549	10.6549	1.12389	1-autism	Male	white
GSM667208	101	116.102	15.1022	1.14953	1-autism	Male	white
GSM667210	83	96.4247	13.4247	1.16174	1-autism-sib	Male	white
GSM667211	87	121.771	34.771	1.39967	1-autism-sib	Male	white
GSM667212	171	153.543	-17.4571	0.897912	1-autism-sib	Male	white
GSM667213	113	140.47	27.4703	1.2431	1-autism	Male	white
GSM667214	122	127.512	5.51154	1.04518	1-autism	Male	white
GSM667215	114	107.62	-6.37998	0.944035	1-autism	Male	white
GSM667216	187	152.04	-34.9601	0.813048	1-autism-sib	Male	white
GSM667217	109	124.237	15.237	1.13979	1-autism	Male	white
GSM667218	50	61.1809	11.1809	1.22362	1-autism-sib	Male	white
GSM667219	83	121.842	38.842	1.46798	1-autism	Male	white
GSM667220	203	208.63	5.62957	1.02773	1-autism	Male	white
GSM667221	128	130.575	2.57499	1.02012	4-aspergers	Male	white
GSM667222	157	153.499	-3.50081	0.977702	1-autism	Male	white
GSM667223	128	144.779	16.7791	1.13109	1-autism	Male	white
GSM667225	167	180.32	13.3198	1.07976	1-autism-sib	Male	white
GSM667226	88	102.124	14.124	1.1605	1-autism-sib	Male	white
GSM667228	85	81.2777	-3.72232	0.956208	1-autism-sib	Male	white
GSM667229	100	118.004	18.0036	1.18004	1-autism	Male	white
GSM667230	170	172.296	2.29588	1.01351	1-autism-sib	Male	white
GSM667231	145	155.861	10.8613	1.07491	1-autism	Male	white
GSM667232	196	161.498	-34.5019	0.82397	1-autism	Male	white
GSM667233	151	132.664	-18.3356	0.878572	1-autism-sib	Male	white
GSM667234	204	205.427	1.42659	1.00699	1-autism	Male	white
GSM667235	98	105.504	7.50387	1.07657	1-autism	Male	white
GSM667237	159	145.709	-13.2912	0.916407	1-autism-sib	Male	white
GSM667238	140	158.049	18.0488	1.12892	1-autism-sib	Male	white
GSM667239	76	106.661	30.6614	1.40344	1-autism	Male	other
GSM667240	181	180.204	-0.795917	0.995603	1-autism	Male	white
GSM667241	110	107.905	-2.09484	0.980956	1-autism-sib	Male	other
GSM667242	151	149.106	-1.89355	0.98746	1-autism	Male	white
GSM667243	180	193.663	13.6634	1.07591	1-autism-sib	Male	white
GSM667244	51	73.1105	22.1105	1.43354	1-autism	Male	white
GSM667245	129	121.465	-7.53512	0.941588	1-autism	Male	white
GSM667246	60	52.8387	-7.16128	0.880645	2-asd-sib	Male	white
GSM667247	128	129.719	1.71865	1.01343	1-autism	Male	white
GSM667248	137	154.48	17.4803	1.12759	1-autism	Male	white
GSM667249	95	120.563	25.5632	1.26909	1-autism-sib	Male	white
GSM667250	98	87.7855	-10.2145	0.895771	1-autism-sib	Male	white
GSM667251	191	164.274	-26.7263	0.860072	1-autism-sib	Male	white
GSM667252	137	137.197	0.196934	1.00144	1-autism-sib	Male	white
GSM667253	87	79.8134	-7.18661	0.917395	2-asd	Male	white
GSM667256	74	73.0785	-0.921538	0.987547	1-autism	Male	white
GSM667257	141	157.797	16.7974	1.11913	1-autism-sib	Male	white
GSM667258	73	58.4336	-14.5664	0.80046	1-autism	Male	white
GSM667259	128	112.235	-15.7647	0.876838	2-asd	Male	white
GSM667260	126	123.897	-2.10264	0.983312	1-autism	Male	white
GSM667262	49	15.2563	-33.7437	0.311354	1-autism-sib	Male	white
GSM667263	82	88.5405	6.54054	1.07976	2-asd	Male	white
GSM667265	110	105.007	-4.99344	0.954605	2-asd-sib	Male	white
GSM667266	110	117.735	7.73471	1.07032	2-asd-sib	Male	white
GSM667267	138	139.867	1.86712	1.01353	2-asd	Male	white
GSM667268	59	57.3665	-1.63346	0.972314	1-autism-sib	Male	white
GSM667269	77	125.919	48.9195	1.63532	1-autism	Male	white
GSM667270	121	130.466	9.46629	1.07823	1-autism	Male	white
GSM667271	84	98.2579	14.2579	1.16974	1-autism	Male	white
GSM667272	50	61.3368	11.3368	1.22674	2-asd-sib	Male	white
GSM667273	157	147.562	-9.43788	0.939886	1-autism-sib	Male	white
GSM667274	146	128.284	-17.7158	0.878659	1-autism-sib	Male	white
GSM667276	50	41.7128	-8.28719	0.834256	1-autism-sib	Male	white
GSM667277	186	170.959	-15.0407	0.919136	1-autism	Male	white
GSM667278	200	181.402	-18.5977	0.907012	1-autism	Male	white
GSM667281	163	154.645	-8.35534	0.94874	1-autism-sib	Male	white
GSM667282	81	71.8914	-9.10864	0.887548	1-autism-sib	Male	white
GSM667283	48	67.9682	19.9682	1.416	1-autism	Male	white
GSM667284	113	119.871	6.87091	1.0608	1-autism	Male	white
GSM667285	79	86.4358	7.43576	1.09412	1-autism-sib	Male	white
GSM667286	103	102.851	-0.149415	0.998549	1-autism	Male	white
GSM667287	99	111.946	12.9458	1.13077	1-autism	Male	white
GSM667288	138	146.677	8.67684	1.06288	1-autism	Male	white
GSM667289	76	85.2534	9.25335	1.12175	1-autism-sib	Male	white
GSM667290	108	122.667	14.6672	1.13581	1-autism-sib	Male	white
GSM667291	118	155.164	37.1644	1.31495	1-autism	Male	white
GSM667292	50	53.2418	3.24178	1.06484	1-autism-sib	Male	more-than-one-race
GSM667293	120	127.27	7.26967	1.06058	1-autism	Male	white
GSM667294	96	94.2101	-1.78994	0.981355	1-autism-sib	Male	white
GSM667295	61	79.8739	18.8739	1.30941	1-autism	Male	white
GSM667296	172	149.738	-22.2616	0.870572	1-autism-sib	Male	white
GSM667297	71	74.6242	3.62423	1.05105	1-autism-sib	Male	more-than-one-race
GSM667299	56	38.9003	-17.0997	0.694648	1-autism	Male	more-than-one-race
GSM667300	75	73.8747	-1.12534	0.984996	1-autism	Male	african-amer
GSM667301	75	73.2891	-1.71088	0.977188	1-autism-sib	Male	white
GSM667302	81	97.1637	16.1637	1.19955	1-autism	Male	more-than-one-race
GSM667304	134	144.63	10.6301	1.07933	1-autism-sib	Male	more-than-one-race
GSM667306	100	108.722	8.72187	1.08722	1-autism	Male	white
GSM667307	144	141.428	-2.57184	0.98214	2-asd	Male	white
GSM667308	52	40.4111	-11.5889	0.777136	1-autism	Male	white
GSM667309	108	123.055	15.0546	1.13939	1-autism	Male	more-than-one-race
GSM667310	118	131.938	13.9382	1.11812	1-autism	Male	white
GSM667311	70	65.8817	-4.11835	0.941166	1-autism-sib	Male	white
GSM667312	97	113.148	16.1477	1.16647	1-autism-sib	Male	white
GSM667313	66	83.9698	17.9698	1.27227	1-autism	Male	more-than-one-race
GSM667314	79	83.3629	4.36292	1.05523	1-autism-sib	Male	white
GSM667315	109	149.767	40.7667	1.37401	2-asd-sib	Male	white
GSM667316	50	51.887	1.88697	1.03774	1-autism-sib	Male	more-than-one-race
GSM667317	172	160.224	-11.7758	0.931536	1-autism	Male	white
GSM667318	172	166.743	-5.2571	0.969435	1-autism-sib	Male	white
GSM667319	81	79.1407	-1.85928	0.977046	1-autism	Male	white
GSM667320	100	108.485	8.48545	1.08485	1-autism-sib	Male	white
GSM667321	91	82.3073	-8.69271	0.904476	1-autism	Male	white
GSM667322	148	142.545	-5.45539	0.963139	1-autism-sib	Male	white
GSM667324	87	101.276	14.2758	1.16409	1-autism	Male	white
GSM667325	162	168.766	6.76552	1.04176	1-autism-sib	Male	white
GSM667326	53	66.2178	13.2178	1.24939	1-autism	Male	white
GSM667327	70	65.303	-4.69704	0.932899	1-autism-sib	Male	white
GSM667329	183	147.898	-35.102	0.808186	1-autism	Male	more-than-one-race
GSM667331	208	184.186	-23.8137	0.885511	1-autism	Male	other
GSM667332	146	201.145	55.1453	1.37771	1-autism	Male	white
GSM667333	162	177.005	15.0054	1.09263	1-autism	Male	white
GSM667334	132	131.854	-0.146251	0.998892	1-autism-sib	Male	white
GSM667335	178	172.492	-5.50771	0.969058	1-autism-sib	Male	white
GSM667336	55	63.7092	8.70917	1.15835	1-autism-sib	Male	white
GSM667337	69	76.764	7.76404	1.11252	1-autism	Male	white
GSM667338	100	104.387	4.38696	1.04387	1-autism	Male	white
GSM667339	208	155.289	-52.7108	0.746583	1-autism-sib	Male	more-than-one-race
GSM667340	107	109.896	2.89632	1.02707	1-autism-sib	Male	white
GSM667342	93	120	26.9999	1.29032	1-autism-sib	Male	asian
GSM667343	123	131.067	8.06711	1.06559	1-autism	Male	other
GSM667344	123	126.073	3.07265	1.02498	1-autism-sib	Male	white
GSM667345	52	69.5849	17.5849	1.33817	1-autism	Male	asian
GSM667347	145	139.094	-5.90628	0.959267	1-autism-sib	Male	white
GSM667348	157	121.053	-35.9468	0.77104	1-autism	Male	white
GSM667349	77	112.37	35.3698	1.45935	1-autism	Male	white
GSM667350	114	133.849	19.8486	1.17411	1-autism-sib	Male	white
GSM667351	183	165.763	-17.237	0.905809	1-autism	Male	white
GSM667352	111	115.607	4.60717	1.04151	1-autism	Male	white
GSM667354	70	75.2968	5.29677	1.07567	1-autism-sib	Male	asian
GSM667355	139	108.806	-30.1937	0.782779	4-aspergers-sib	Male	white
GSM667356	73	69.8618	-3.13816	0.957012	1-autism-sib	Male	white
GSM667357	90	106.631	16.6306	1.18478	1-autism	Male	white
GSM667358	87	68.8591	-18.1409	0.791484	4-aspergers	Male	white
GSM667359	102	100.771	-1.22918	0.987949	1-autism-sib	Male	more-than-one-race
GSM667360	146	137.082	-8.91766	0.93892	1-autism	Male	asian
GSM667361	109	105.289	-3.71065	0.965957	1-autism-sib	Male	white
GSM667362	173	142.473	-30.5272	0.823542	1-autism	Male	white
GSM667364	121	129.121	8.12097	1.06712	1-autism	Male	white
GSM667365	103	112.927	9.92665	1.09638	1-autism-sib	Male	more-than-one-race
GSM667366	59	66.1851	7.18514	1.12178	1-autism	Male	more-than-one-race
GSM667367	75	76.7188	1.71876	1.02292	1-autism	Male	more-than-one-race
GSM667368	197	208.238	11.2383	1.05705	1-autism-sib	Male	white
GSM667369	199	182.377	-16.6229	0.916468	1-autism-sib	Male	more-than-one-race
GSM667370	181	165.733	-15.2671	0.915651	1-autism	Male	more-than-one-race
GSM667372	154	122.6	-31.4005	0.796101	1-autism	Male	white
GSM667373	144	138.178	-5.82221	0.959568	1-autism-sib	Male	white
GSM667374	89	103.765	14.765	1.1659	1-autism-sib	Male	more-than-one-race
GSM667375	96	91.4573	-4.54268	0.95268	1-autism-sib	Male	white
GSM667376	163	160.999	-2.00103	0.987724	1-autism-sib	Male	white
GSM667378	83	100.442	17.4415	1.21014	1-autism-sib	Male	white
GSM667381	75	90.7717	15.7717	1.21029	1-autism	Male	asian
GSM667383	71	82.4115	11.4115	1.16072	1-autism-sib	Male	white
GSM667384	108	130.603	22.603	1.20929	1-autism-sib	Male	white
GSM667386	53	61.8981	8.89812	1.16789	1-autism	Male	white
GSM667387	188	174.549	-13.4506	0.928454	1-autism	Male	white
GSM667389	96	149.531	53.5311	1.55762	1-autism	Male	more-than-one-race
GSM667390	74	90.2194	16.2194	1.21918	1-autism-sib	Male	more-than-one-race
GSM667391	67	94.4349	27.4349	1.40948	1-autism	Male	other
GSM667392	80	109.112	29.1119	1.3639	1-autism	Male	more-than-one-race
GSM667393	169	189.237	20.2367	1.11974	1-autism-sib	Male	white
GSM667394	137	134.791	-2.2086	0.983879	1-autism	Male	white
GSM667395	107	105.123	-1.87686	0.982459	1-autism-sib	Male	white
GSM667397	161	154.543	-6.45723	0.959893	1-autism-sib	Male	more-than-one-race
GSM667400	205	178.748	-26.252	0.871941	1-autism-sib	Male	white
GSM667401	155	154.083	-0.91725	0.994082	1-autism-sib	Male	white
GSM667402	111	109.729	-1.27073	0.988552	1-autism	Male	white
GSM667403	142	141.054	-0.946123	0.993337	1-autism-sib	Male	white
GSM667404	119	189.9	70.8998	1.5958	1-autism	Male	white
GSM667406	58	101.003	43.0029	1.74143	1-autism-sib	Male	white
GSM667407	78	118.085	40.0845	1.5139	1-autism	Male	white
GSM667408	163	162.501	-0.499092	0.996938	1-autism-sib	Male	white
GSM667411	137	101.308	-35.6918	0.739476	1-autism	Male	white
GSM667412	192	200.102	8.10243	1.0422	1-autism-sib	Male	white
GSM667413	153	158.655	5.65451	1.03696	4-aspergers-sib	Male	white
GSM667416	85	107.167	22.1669	1.26079	1-autism	Male	white
GSM667417	67	99.6519	32.6519	1.48734	1-autism-sib	Male	african-amer
GSM667418	70	105.694	35.6935	1.50991	1-autism-sib	Male	white
GSM667420	97	108.212	11.2119	1.11559	1-autism	Male	asian
GSM667421	133	152.726	19.7264	1.14832	1-autism-sib	Male	asian
GSM667422	109	129.014	20.0144	1.18362	1-autism	Male	african-amer
GSM667425	76	86.175	10.175	1.13388	1-autism	Male	white
GSM667427	57	77.3778	20.3778	1.35751	1-autism	Male	white
GSM667428	114	129.839	15.8394	1.13894	1-autism	Male	white
GSM667429	121	127.709	6.70881	1.05544	1-autism-sib	Male	more-than-one-race
GSM667430	145	165.764	20.7636	1.1432	1-autism-sib	Male	white
GSM667431	136	149.576	13.5755	1.09982	1-autism-sib	Male	white
GSM667432	106	133.039	27.0386	1.25508	1-autism	Male	white
GSM667433	73	83.9396	10.9396	1.14986	1-autism-sib	Male	white
GSM667434	99	113.074	14.0739	1.14216	1-autism	Male	more-than-one-race
GSM667436	72	84.8328	12.8328	1.17823	1-autism-sib	Male	white
GSM667437	157	158.467	1.46664	1.00934	1-autism-sib	Male	white
GSM667438	94	111.209	17.2088	1.18307	4-aspergers	Male	white
GSM667439	125	183.16	58.1596	1.46528	1-autism-sib	Male	african-amer
GSM667440	206	224.852	18.8516	1.09151	2-asd-sib	Male	not-specified
GSM667441	105	118.68	13.6796	1.13028	4-aspergers-sib	Male	white
GSM667443	83	115.923	32.9229	1.39666	1-autism	Male	white
GSM667445	72	100.262	28.2624	1.39253	1-autism	Male	african-amer
GSM667446	104	150.83	46.8296	1.45028	2-asd	Male	not-specified
GSM667448	137	150.442	13.4421	1.09812	1-autism-sib	Male	more-than-one-race
GSM667450	59	79.0618	20.0618	1.34003	1-autism	Male	white
GSM667451	163	174.29	11.2904	1.06927	1-autism	Male	white
GSM667452	101	139.516	38.5161	1.38135	1-autism	Male	more-than-one-race
GSM667453	82	94.8435	12.8435	1.15663	1-autism-sib	Male	white
GSM667454	147	154.784	7.78356	1.05295	1-autism-sib	Male	white
GSM667455	59	106.458	47.4584	1.80438	2-asd	Male	white
GSM667456	166	180.805	14.8053	1.08919	1-autism	Male	more-than-one-race
GSM667457	59	61.4817	2.48167	1.04206	1-autism	Male	white
GSM667459	137	148.595	11.5951	1.08464	2-asd-sib	Male	white
GSM667460	195	202.723	7.72276	1.0396	1-autism-sib	Male	white
GSM667461	171	196.462	25.4616	1.1489	1-autism-sib	Male	white
GSM667462	134	139.402	5.40241	1.04032	1-autism	Male	white
GSM667463	144	141.935	-2.06453	0.985663	1-autism	Male	white
GSM667464	161	175.93	14.9304	1.09274	1-autism-sib	Male	white
GSM667465	160	174.121	14.1209	1.08826	1-autism-sib	Male	asian
GSM667466	165	193.266	28.266	1.17131	1-autism-sib	Male	white
GSM667468	131	158.354	27.3542	1.20881	1-autism-sib	Male	white
GSM667469	120	138.386	18.3858	1.15321	1-autism	Male	white
GSM667470	135	171.428	36.4284	1.26984	1-autism	Male	asian
